# Supplementary material
Source: PubMed Central journal article supplement (PMC8641096)
Supplement: bloodBLD2021012037-suppl1.pdf [file bloodBLD2021012037-suppl1.pdf]

## Supplemental Materials

- 1- Supplemental Methods
- 2- Supplemental Table 1
- 3- Supplemental Table 2
- 4- Supplemental Table 3
- 4- Supplemental Figure 1
- 5- Supplemental Figure 2
- 6- Individual variant datasheets

## ***Supplemental Methods***

### ***Guinea pig erythrocyte hemolytic assay***

Overall FH functionality was assessed using a modification of the FH-dependent sheep erythrocyte (ShE) hemolytic assay.<sup>1</sup> In our modified assay, we used guinea pig erythrocytes (TCS biosciences, Buckingham, UK) instead of ShE to increase the dynamic range of the assay, and compared the amounts of the FH variants versus wild-type protein required to recover the regulatory capacity of normal human serum that was 75% depleted of FH (NHS $\Delta$ FH). The negative control was prepared by adding 20 mM ethylenediaminetetraacetic acid (EDTA), and the maximum NHS $\Delta$ FH-induced lysis was defined as 100%. Each FH variant was analyzed twice in separate experiments. For each experiment, we calculated the relative amount of protein as compared to WT protein required to decrease lysis of guinea pig erythrocytes by 50% (HR<sub>50</sub>). An HR<sub>50</sub> value between 0.71 and 1.29 (mean of WT +/- 2SD) was considered normal.

### ***Preparation of C3b-decorated sheep erythrocytes***

To assess FH DAA and CA, C3b-decorated ShEs (C3b-ShE) were prepared in isotonic veronal-buffered saline containing 0.1% gelatin (GVB). Briefly, C3b was deposited on washed ShEs (1 mL,  $1 \times 10^9$ /mL; Colorado Serum Co., Denver, CO) by incubation with 45  $\mu$ L of Factor B (FB)-partially inactivated/FH-depleted human serum at 37°C for 30 minutes in GVB buffer supplemented with 10 mM ethylene glycol-bis(2-aminoethylether)-N N N'N'-tetraacetic acid (EGTA), 5 mM MgCl<sub>2</sub> (GVB-Mg<sup>2+</sup>). Cells were then washed three times and resuspended in 1 mL of GVB-Mg<sup>2+</sup> buffer. The amount of FB (Complement Technology Inc., Tyler, TX) needed to generate approximately one C3 convertase per cell was determined by titration (FB 0.4-2  $\mu$ g) with a constant amount of Factor D (FD) (0.3  $\mu$ g; Complement Technology Inc., Tyler, TX) in 0.2 mL of C3b-ShE at 30°C for 5 minutes; the reaction was stopped by adding 0.3 mL of ice-cooled GVB-EDTA buffer. Hemolysis was induced by adding rat serum (diluted 1:9

in GVB with 10 mM EDTA; rat serum-EDTA) as a source of C3-9, followed by incubation at 37°C for 60 minutes. After centrifugation, the degree of hemolysis was determined by measuring optical density at 415 nm (OD<sub>415</sub>). Background (spontaneous lysis) was corrected using GVB-EDTA buffer. The amount of hemolysis was expressed as a percentage of complete lysis by water (100%). Hemolytic sites on ShEs were calculated as  $Z = -\ln(1-\text{hemolysis\_percentage})$ .

### ***Decay accelerating activity (DAA)***

To assess FH DAA, C3 convertase was assembled with FB (amount previously titrated,  $Z = 1$ ) and FD (0.3 µg) using 0.2 mL of C3b-ShE ( $1 \times 10^9/\text{mL}$ ) in GVB-Mg<sup>2+</sup> buffer at 30°C for 5 minutes. The reaction was stopped by adding 0.3 mL of ice-cooled GVB-EDTA buffer and, immediately thereafter, 50 µL of C3bBb-ShE was transferred into 350 µL of recombinant FH to yield a final concentration of 10 nM. The resulting mixture was allowed to decay for 0, 2.5, 5, 8, and 12 minutes. At each of these time points, a portion of mixture (50 µL) was transferred into rat serum-EDTA (50 µL) to assess residual C3 convertase activity as described earlier. DAA assays for all recombinant FH variants also included WT recombinant FH and were completed on at least three independent runs. The normal threshold for DAA was considered to be hemolysis of <12.5% at 5-minutes (mean of WT from all runs + 2SD).

### ***Factor I cofactor activity (CA)***

To assess FH CA, C3b-ShE (50 µL,  $1 \times 10^9/\text{mL}$ ) were incubated with recombinant FH (final concentration 50 nM) and commercially available FI (final concentration 20 nM; Complement Technology Inc., Tyler, TX) at 37°C for 15 minutes in a total volume of 0.4 mL of GVB-Mg<sup>2+</sup> buffer. After three washes, cells were resuspended in 50 µL of GVB-Mg<sup>2+</sup> buffer and residual C3bs on ShE were titrated out by using an excess of FB (5× of the amount at  $Z = 1$ ) and FD (0.3 µg) in GVB-Mg<sup>2+</sup> buffer. C3 convertase was formed at 30°C for 5 minutes and the reaction was stopped by adding 300 µL of GVB-EDTA

buffer. A portion of the mixture (50  $\mu$ L) was then transferred into rat serum-EDTA (50  $\mu$ L) to assess residual C3 convertase activity, as described earlier. CA assays for all recombinant FH variants also included WT recombinant FH and were completed on at least three independent runs. The normal threshold for CA was considered to be hemolysis < 2.5% after 15-minute incubation (mean of WT from all runs + 2SD).

### ***C3b-binding assay***

Binding of FH proteins to immobilized C3b was measured using an in-house plate assay. Briefly, 96-well plates were coated with 50  $\mu$ L of C3b at 5  $\mu$ g/mL in phosphate-buffered saline (PBS) overnight. After blocking the plates with Tris-Tween (50 mM Tris pH 7.4, 150 mM NaCl, 0.2% Tween20) containing 1% bovine serum albumin (BSA) for 1 hour at room temperature, 100  $\mu$ L of the FH proteins was added at different concentrations and the plates were incubated for 1 hour at room temperature. Bound FH was detected using an in-house mouse monoclonal anti-human factor H (mAb 214) followed by a horseradish peroxidase (HRP)-conjugated goat anti-mouse IgG antibody. After incubation with 3,3',5,5'-tetramethylbenzidine (TMB) substrate, 0.1M sulfuric acid was added to stop the reaction. Absorbance was measured at 450 nm. FH variants were tested in triplicate in at least two different experiments. For each FH variant, we calculated the relative amount of protein as compared to WT protein needed to provide 50% C3b-binding ( $BD_{50}$ ). A  $BD_{50}$  value between 0.33 and 1.67 (mean of WT +/-2SD) was considered normal.

### References

- 1- Sánchez-Corral P, González-Rubio C, Rodríguez de Córdoba S, López-Trascasa M. Functional analysis in serum from atypical Hemolytic Uremic Syndrome patients reveals impaired protection of host cells associated with mutations in factor H. *Mol Immunol*. 2004;41(1):81-84.

**Supplemental Table 1. Clinical and genetic data of patients carrying benign FH variants**

| Carrier Variant      | Gender | Age onset | Outcome | Transplant | Recurrences | Treatment       | Other Genetics factors          | FH levels | Refs. |
|----------------------|--------|-----------|---------|------------|-------------|-----------------|---------------------------------|-----------|-------|
| p.R2T                | M      | 47        | n/a     | n/a        | n/a         | n/a             | No                              | n/a       | 1     |
| p.M11T               | M      | 42        | CKD     | 0          | 0           | No              | No                              | N         | 1     |
| p.L74F               | n/a    | n/a       | n/a     | n/a        | n/a         | n/a             | n/a                             | n/a       | 2     |
| p.K82R               | n/a    | n/a       | n/a     | n/a        | n/a         | n/a             | n/a                             | n/a       | 2     |
| p.T91S               | n/a    | n/a       | n/a     | n/a        | n/a         | n/a             | n/a                             | n/a       | 3     |
| p.V111E              | M      | 44        | ESRD    | 1          | 0           | No              | No                              | n/a       | 1     |
| p.A151T              | n/a    | n/a       | n/a     | n/a        | n/a         | n/a             | MCP (p.A353V)                   | n/a       | 2     |
| p.V158I              | F      | 30        | CKD     | 0          | 0           | No              | MCP (p.D266N)                   | n/a       | 1     |
|                      | F      | 38        | CKD     | 0          | 0           | No              | CFH (p.A1027P)                  | n/a       | 1     |
|                      | F      | 60        | ESRD    | 1          | 2           | Eculizumab      | No                              | n/a       | 1     |
| p.S159N              | F      | 44        | ESRD    | 0          | 1           | PE              | No                              | n/a       | 1     |
| p.A161S              | F      | 31        | ESRD    | 0          | n/a         | PE              | No                              | N         | 4     |
|                      | M      | 20        | CKD     | 0          | n/a         | Eculizumab      | CFB (p.E566A)                   | N         | 5     |
|                      | M      | 1         | CR      | 0          | 0           | No              | No                              | n/a       | 1     |
| p.M162V              | n/a    | n/a       | n/a     | n/a        | n/a         | n/a             | n/a                             | N         | 6     |
| p.D187V              | n/a    | n/a       | n/a     | n/a        | n/a         | n/a             | n/a                             | n/a       | 2     |
| p.I216T              | M      | 16        | ESRD    | 0          | 0           | IS/PE/FFP       | No                              | QD        | 7     |
| p.I221V              | M      | 78        | CR      | 0          | n/a         | No              | No                              | n/a       | 1     |
| p.R303Q              | F      | 24        | ESRD    | 2          | 2           | n/a             | n/a                             | N         | 8     |
| p.R341H              | F      | 23        | ESRD    | 0          | n/a         | None            | C3 (p.R161W)                    | N         | 4     |
| p.S411T              | M      | 17        | CR      | 0          | 1           | Eculizumab      | FHR-1 (p.L290S;A296V)           | N         | 9     |
|                      | F      | 47        | ESRD    | 0          | n/a         | PE              | FHR-1 (p.L290S;A296V)           | N         | 9     |
| p.P503A              | n/a    | n/a       | n/a     | n/a        | n/a         | n/a             | n/a                             | n/a       | 2     |
| p.N516K              | F      | 26        | CR      | 0          | 0           | Eculizumab (6m) | C3 (p.K65Q)                     | n/a       | 10    |
|                      | M      | 51        | n/a     | 0          | n/a         | n/a             | No                              | N         | 5     |
|                      | F      | 3         | CKD     | 0          | 0           | Eculizumab      | No                              | n/a       | 1     |
| p.D522G              | n/a    | n/a       | n/a     | n/a        | n/a         | n/a             | n/a                             | n/a       | 2     |
| p.T531A              | n/a    | n/a       | n/a     | n/a        | n/a         | n/a             | n/a                             | n/a       | 2     |
| p.I551T(*)           | M      | 29        | CKD     | n/a        | n/a         | n/a             | No                              | N         | 5     |
| p.R582H              | n/a    | n/a       | n/a     | n/a        | n/a         | n/a             | n/a                             | N         | 6     |
| p.V609I              | F      | 20        | CKD     | 0          | 2           | No              | C3 (p.T1383N)                   | n/a       | 1     |
|                      | F      | 21        | CKD     | 0          | 1           | PE/Eculizumab   | CFH (p.D1119N)                  | N         | 1     |
|                      | M      | < 1       | CR      | 0          | 0           | No              | No                              | n/a       | 1     |
| p.V641A              | F      | 30        | CKD     | 0          | 0           | No              | No                              | n/a       | 1     |
| p.G650V              | F      | 46        | CKD     | 0          | 0           | PE              | No                              | QD        | 5     |
|                      | M      | 9         | ESRD    | 0          | n/a         | PE              | CFH (p.S979C); MCP (c.287-2A>G) | n/a       | 1     |
| p.V686M <sup>o</sup> | n/a    | n/a       | n/a     | n/a        | n/a         | n/a             | n/a                             | QD        | 11    |
| p.P707L              | F      | 30        | CR      | 0          | 0           | Eculizumab (4m) | n/a                             | n/a       | 12    |
| p.H821Y              | n/a    | n/a       | n/a     | n/a        | n/a         | n/a             | n/a                             | n/a       | 2     |
| p.V835L              | n/a    | n/a       | n/a     | n/a        | n/a         | n/a             | n/a                             | n/a       | 13    |
| p.S884P              | F      | 10        | CKD     | 0          | 0           | Eculizumab      | No                              | N         | 1     |

|             |     |     |      |     |     |               |                                     |     |    |
|-------------|-----|-----|------|-----|-----|---------------|-------------------------------------|-----|----|
| p.Y951H     | n/a | n/a | n/a  | n/a | n/a | n/a           | n/a                                 | n/a | 14 |
| p.T956M     | M   | 1   | n/a  | n/a | n/a | FFP           | No                                  | N   | 15 |
|             | F   | 23  | ESRD | n/a | n/a | n/a           | MCP (p.P165S)                       | N   | 16 |
| p.F960S     | F   | 34  | CKD  | n/a | n/a | n/a           | C3 (p.R161W)                        | n/a | 17 |
| p.T1017I    | M   | 44  | CKD  | n/a | n/a | n/a           | CFHR1 (p.T205M)                     | N   | 5  |
|             | M   | 14  | n/a  | n/a | n/a | n/a           | No                                  | N   | 1  |
| p.Y1021F    | n/a | n/a | n/a  | n/a | n/a | n/a           | CFH (p.R1210C)                      | N   | 18 |
| p.A1027P    | M   | 14  | n/a  | n/a | n/a | n/a           | No                                  | N   | 1  |
| p.V1054I    | M   | 46  | CR   | 0   | 0   | none          | CFH (c.2957-1A>G); MCP (c.286+1G>A) | QD  | 5  |
|             | M   | 60  | ESRD | 0   | 0   | Ecuzumab      | No                                  | N   | 5  |
| p.Y1058H    | M   | 9   | CR   | 0   | 2   | PE/Ecuzumab   | C3 (p.I1157T); CFH (p.V1060A)       | N   | 19 |
|             | F   | 11  | CKD  | 0   | n/a | Ecuzumab      | CFH (p.V1060L)                      | N   | 1  |
|             | M   | 24  | n/a  | n/a | n/a | No            | CFH (p.V1060L)                      | N   | 1  |
| p.I1059T(*) | M   | 57  | n/a  | n/a | n/a | n/a           | MCP (p.R96G); C3 (p.G1224N)         | N   | 5  |
| p.V1060L    | M   | 9   | CR   | 0   | 2   | PE/Ecuzumab   | C3 (p.I1157T); CFH (p.Y1058H)       | N   | 19 |
| p.V1060A    | n/a | n/a | n/a  | n/a | n/a | n/a           | n/a                                 | n/a | 2  |
| p.S1061P    | F   | 8.5 | CKD  | 0   | 1   | OHCbl         | MTHFR (c.677C>T) Hom                | N   | 20 |
| p.Q1076E    | n/a | n/a | n/a  | n/a | n/a | n/a           | CFH (Q1187RfsTer84)                 | n/a | 21 |
|             | M   | 53  | CR   | 0   | 0   | None          | No                                  | N   | 5  |
|             | M   | 17  | n/a  | n/a | n/a | No            | No                                  | N   | 1  |
| p.R1078S    | F   | 25  | ESRD | 0   | 1   | PE            | No                                  | n/a | 1  |
| p.E1088D    | M   | 51  | R    | 0   | 0   | Ecuzumab (4w) | No                                  | n/a | 10 |
| p.P1130L    | n/a | n/a | n/a  | n/a | n/a | n/a           | CFH (p.N516K)                       | n/a | 2  |
| p.E1135D    | n/a | n/a | n/a  | n/a | n/a | n/a           | n/a                                 | n/a | 22 |
| p.Q1143E(*) | M   | 45  | CKD  | 1   | 2   | n/a           | C3 (p.V850I)                        | N   | 5  |
| p.T1184R    | n/a | n/a | n/a  | n/a | n/a | n/a           | n/a                                 | N   | 2  |
| p.V1200L    | n/a | n/a | n/a  | n/a | n/a | n/a           | n/a                                 | n/a | 2  |
| p.R1203W    | M   | 40  | ESRD | 0   | 1   | n/a           | No                                  | QD  | 16 |
|             | M   | 22  | n/a  | na  | n/a | n/a           | No                                  | QD  | 1  |

F (female); M (male); CKD (chronic kidney disease); ESRD (End Stage Renal Disease); CR/PR/R (complete remission/partial remission/remission); N (Normal); QD (Quantitative Deficiency); n/a (data no available); IS (immunosuppression); PE (plasma exchange); FFP (fresh-frozen plasma); OHCbl (hydroxycobalamin); K/L (combined kidney and liver transplant). (\*) Variants I551T, I1059T and Q1143E are in complete linkage disequilibrium.

**Supplemental Table 2. Clinical and genetic data of patients carrying pathogenic FH variants**

| Carrier Variant | Gender | Age onset | Outcome     | Transplant | Recurrences | Treatment     | Other Genetics Factors | FH Levels | Refs. |
|-----------------|--------|-----------|-------------|------------|-------------|---------------|------------------------|-----------|-------|
| p.R53C          | F      | 2         | CKD         | 0          | 0           | Eculizumab    | No                     | N         | 15    |
|                 | F      | 27        | ESRD        | 0          | 0           | n/a           | No                     | N         | 4     |
|                 | M      | 0         | n/a         | 0          | 4           | Eculizumab    | C3 (p.R951H)           | N         | 16    |
| p.R78G          | n/a    | n/a       | n/a         | n/a        | n/a         | n/a           | No                     | n/a       | 14    |
| p.Q81P          | F      | 30        | ESRD        | 0          | n/a         | PE            | No                     | N         | 4     |
| p.W134R         | F      | 2         | CR          | 0          | 2           | PE            | CFH (p.V1197A;V111E)   | QD        | 23    |
| p.R166L         | F      | 20        | CR          | 0          | n/a         | Eculizumab    | No                     | N         | 24    |
| p.R175P         | M      | 30        | CKD         | 0          | 1           | PE            | MCP (p.S274fs)         | n/a       | 1     |
| p.W198R         | M      | 20        | ESRD        | 0          | 2           | n/a           | No                     | N         | 16    |
| p.S199G         | n/a    | n/a       | n/a         | n/a        | n/a         | n/a           | CFH (E1172X)           | n/a       | 2     |
| p.G218E         | F      | 18        | ESRD        | 0          | 1           | PE            | No                     | QD        | 4     |
| p.P258L         | n/a    | n/a       | n/a         | n/a        | n/a         | n/a           | No                     | QD        | 5     |
| p.C325Y         | F      | 17        | n/a         | n/a        | n/a         | n/a           | No                     | n/a       | 1     |
| p.Y355S         | F      | 0         | CR          | 0          | 0           | PE            | n/a                    | QD        | 25    |
| p.G397R         | F      | 25        | CR          | 0          | n/a         | PE            | No                     | QD        | 4     |
| p.Q400K         | F      | 21        | CKD         | 0          | 0           | No            | No                     | QD        | 1     |
| p.C431Y         | F      | 35        | CKD         | 0          | n/a         | PE            | No                     | QD        | 4     |
| p.C448Y         | F      | 27        | ESRD        | 3          | 4           | n/a           | No                     | QD        | 16    |
| p.Y475S         | F      | 25        | ESRD        | 2          | 3           | Eculizumab    | No                     | QD        | 26    |
| p.Y899D         | M      | 0.5       | ESRD        | 1          | 1           | n/a           | CFH (p.G1194D)         | QD        | 27    |
| p.C973Y         | M      | 0.4       | ESRD        | 1          | Several     | FFP           | CFH (p.V1197A)         | QD        | 28    |
| p.C1077W        | F      | 0         | CR          | 0          | 4           | PE            | CFH (p.Q1139X)         | QD        | 29    |
| p.D1119N        | F      | 1         | n/a         | 0          | n/a         | n/a           | THBD (p.P501L)         | N         | 15    |
|                 | F      | 21        | CKD         | 0          | 1           | PE/Eculizumab | CFH (p.V609I)          | N         | 1     |
|                 | F      | 44        | n/a         | n/a        | n/a         | n/a           | CFH (p.V609I)          | n/a       | 1     |
| p.D1119G        | F      | 2         | ESRD        | 0          | 1           | PE            | MCP (p.T383I)          | n/a       | 1     |
| p.D1119E        | F      | <1        | Proteinuria | 0          | 1           | Eculizumab    | No                     | QD        | 1     |
| p.Q1137L        | n/a    | n/a       | n/a         | n/a        | n/a         | n/a           | n/a                    | n/a       | 30    |
| p.Y1142C        | F      | 1         | Death       | 0          | 3           | n/a           | No                     | N         | 31    |
|                 | F      | 22        | PR          | 0          | n/a         | n/a           | No                     | N         | 5     |
| p.C1152S        | F      | 33        | n/a         | n/a        | n/a         | Eculizumab    | No                     | QD        | 1     |
| p.W1157R        | F      | 45        | n/a         | n/a        | n/a         | PE            | No                     | N         | 5     |
|                 | n/a    | n/a       | n/a         | n/a        | n/a         | n/a           | n/a                    | N         | 18    |
| p.P1161T        | M      | 43        | ESRD        | 0          | 1           | n/a           | No                     | N         | 16    |
| p.C1163W        | n/a    | n/a       | n/a         | n/a        | n/a         | n/a           | n/a                    | n/a       | 14    |
| p.H1165Y        | F      | 31        | CR          | 0          | 0           | PE            | MCP (p.A353V)          | n/a       | 32    |
| p.P1166L        | F      | 29        | CKD         | 1          | n/a         | Eculizumab    | No                     | N         | 15    |
|                 | M      | 45        | CKD         | 1          | n/a         | n/a           | No                     | N         | 15    |

|          |     |     |            |         |     |            |                  |     |    |
|----------|-----|-----|------------|---------|-----|------------|------------------|-----|----|
| p.V1168A | n/a | n/a | n/a        | n/a     | n/a | n/a        | No               | n/a | 2  |
| p.I1169L | F   | < 1 | n/a        | n/a     | n/a | n/a        | Homozygote       | n/a | 1  |
| p.Y1177C | n/a | n/a | n/a        | n/a     | n/a | n/a        | No               | n/a | 2  |
| p.W1183R | M   | 1   | ESRD       | 1 (K/L) | n/a | PE         | n/a              | N   | 33 |
| p.W1183C | n/a | n/a | n/a        | n/a     | n/a | n/a        | No               | n/a | 2  |
| p.T1184A | n/a | n/a | n/a        | n/a     | n/a | n/a        | No               | N   | 2  |
| p.T1184P | n/a | n/a | n/a        | n/a     | n/a | n/a        | No               | N   | 2  |
| p.K1186T | F   | 30  | ESRD       | 0       | 1   | Eculizumab | No               | N   | 1  |
| p.L1189P | F   | < 1 | n/a        | 0       | 0   | n/a        | No               | n/a | 1  |
|          | M   | < 1 | ESRD       | 2       | 3   | PE         | CFHR5 (p.K144N)  | N   | 1  |
| p.L1189H | M   | 6   | ESRD       | 2       | 1   | PE/FFP/Ecu | n/a              | N   | 34 |
| p.S1191L | M   | 2   | ESRD/Death | 4       | 4   | n/a        | CFH (p.V1197A)   | N   | 16 |
|          | M   | 19  | CR         | 0       | 0   | Eculizumab | No               | N   | 5  |
| p.S1191W | M   | 0.5 | ESRD       | 1       | 3   | n/a        | No               | N   | 5  |
|          | F   | 6   | ESRD       | 1       | 2   | Eculizumab | No               | n/a | 1  |
| p.G1194D | F   | 31  | ESRD       | 1       | 0   | n/a        | MCP (p.F242C)    | N   | 35 |
|          | M   | 72  | n/a        | n/a     | n/a | n/a        | No               | n/a | 1  |
| p.E1198V | n/a | n/a | n/a        | n/a     | n/a | n/a        | n/a              | n/a | 36 |
| p.F1199L | n/a | n/a | n/a        | n/a     | n/a | n/a        | n/a              | n/a | 2  |
| p.R1206C | F   | 7   | AKF        | CR      | 0   | None       | No               | N   | 1  |
| p.R1210C | F   | 29  | ESRD       | 2       | 2   | n/a        | No               | N   | 4  |
|          | F   | 0.5 | Death      | 0       | 5   | n/a        | CFH (p.T1216del) | N   | 16 |
| p.R1215Q | M   | 24  | ESRD       | 0       | 3   | n/a        | MCP (p.R103Q)    | N   | 35 |
|          | F   | 22  | ESRD       | 3       | 3   | n/a        | No               | N   | 16 |
|          | F   | 15  | ESRD       | 2       | 3   | n/a        | CFB (p.I242L)    | N   | 16 |

F (female); M (male); CKD (chronic kidney disease); ESRD (End Stage Renal Disease); CR/PR/R (complete remission/partial remission/remission); N (Normal); QD (Quantitative Deficiency); n/a (data no available); IS (immunosuppression); PE (plasma exchange); FFP (fresh-frozen plasma); OHCbl (hydroxycobalamine); K/L (combined kidney and liver transplant).



## References for Supplemental Tables 1 and 2

1. Iowa. aHUS Database.
2. Osborne AJ, Breno M, Borsa NG, et al. Statistical Validation of Rare Complement Variants Provides Insights into the Molecular Basis of Atypical Hemolytic Uremic Syndrome and C3 Glomerulopathy. *The Journal of Immunology*. 2018;200(7):2464-2478.
3. Bu F, Maga T, Meyer NC, et al. Comprehensive genetic analysis of complement and coagulation genes in atypical hemolytic uremic syndrome. *J Am Soc Nephrol*. 2014;25(1):55-64.
4. Fakhouri F, Roumenina L, Provot F, et al. Pregnancy-associated hemolytic uremic syndrome revisited in the era of complement gene mutations. *J Am Soc Nephrol*. 2010;21(5):859-867.
5. Madrid. aHUS Database.
6. Fremeaux-Bacchi V, Fakhouri F, Garnier A, et al. Genetics and outcome of atypical hemolytic uremic syndrome: a nationwide French series comparing children and adults. *Clin J Am Soc Nephrol*. 2013;8(4):554-562.
7. Gnappi E, Allinovi M, Vaglio A, et al. Membrano-proliferative glomerulonephritis, atypical hemolytic uremic syndrome, and a new complement factor H mutation: report of a case. *Pediatr Nephrol*. 2012;27(10):1995-1999.
8. Fakhouri F, Jablonski M, Lepercq J, et al. Factor H, membrane cofactor protein, and factor I mutations in patients with hemolysis, elevated liver enzymes, and low platelet count syndrome. *Blood*. 2008;112(12):4542-4545.
9. Goicoechea de Jorge E, Tortajada A, García SP, et al. Factor H Competitor Generated by Gene Conversion Events Associates with Atypical Hemolytic Uremic Syndrome. *J Am Soc Nephrol*. 2018;29(1):240-249.
10. Neave L, Gale DP, Cheesman S, Shah R, Scully M. Atypical haemolytic uraemic syndrome in the eculizumab era: presentation, response to treatment and evaluation of an eculizumab withdrawal strategy. *Br J Haematol*. 2019;186(1):113-124.
11. El Karoui K, Boudhabhay I, Petitprez F, et al. Impact of hypertensive emergency and rare complement variants on the presentation and outcome of atypical hemolytic uremic syndrome. *Haematologica*. 2019;104(12):2501-2511.
12. Wetzels JF, van de Kar NC. Discontinuation of eculizumab maintenance treatment for atypical hemolytic uremic syndrome. *Am J Kidney Dis*. 2015;65(2):342.
13. Saunders RE, Goodship TH, Zipfel PF, Perkins SJ. An interactive web database of factor H-associated hemolytic uremic syndrome mutations: insights into the structural consequences of disease-associated mutations. *Hum Mutat*. 2006;27(1):21-30.
14. Caprioli J, Castelletti F, Bucchioni S, et al. Complement factor H mutations and gene polymorphisms in haemolytic uraemic syndrome: the C-257T, the A2089G and the G2881T polymorphisms are strongly associated with the disease. *Hum Mol Genet*. 2003;12(24):3385-3395.
15. Merinero HM, García SP, García-Fernández J, Arjona E, Tortajada A, Rodríguez de Córdoba S. Complete functional characterization of disease-associated genetic variants in the complement factor H gene. *Kidney Int*. 2018;93(2):470-481.
16. Szarvas N, Szilágyi Á, Csuka D, et al. Genetic analysis and functional characterization of novel mutations in a series of patients with atypical hemolytic uremic syndrome. *Mol Immunol*. 2016;71:10-22.
17. Roumenina LT, Frimat M, Miller EC, et al. A prevalent C3 mutation in aHUS patients causes a direct C3 convertase gain of function. *Blood*. 2012;119(18):4182-4191.
18. Neumann HP, Salzmann M, Bohnert-Iwan B, et al. Haemolytic uraemic syndrome and mutations of the factor H gene: a registry-based study of German speaking countries. *J Med Genet*. 2003;40(9):676-681.

19. Toyoda H, Wada H, Miyata T, et al. Disease Recurrence After Early Discontinuation of Eculizumab in a Patient With Atypical Hemolytic Uremic Syndrome With Complement C3 I1157T Mutation. *J Pediatr Hematol Oncol*. 2016;38(3):e137-139.
20. Guignonis V, Frémeaux-Bacchi V, Giraudier S, et al. Late-onset thrombotic microangiopathy caused by cblC disease: association with a factor H mutation. *Am J Kidney Dis*. 2005;45(3):588-595.
21. Richards A, Buddles MR, Donne RL, et al. Factor H mutations in hemolytic uremic syndrome cluster in exons 18-20, a domain important for host cell recognition. *Am J Hum Genet*. 2001;68(2):485-490.
22. Sullivan M, Erlic Z, Hoffmann MM, et al. Epidemiological approach to identifying genetic predispositions for atypical hemolytic uremic syndrome. *Ann Hum Genet*. 2010;74(1):17-26.
23. Kim JJ, Goodship TH, Tizard J, Inward C. Plasma therapy for atypical haemolytic uraemic syndrome associated with heterozygous factor H mutations. *Pediatr Nephrol*. 2011;26(11):2073-2076.
24. Chaudhary P, Hepgur M, Sarkissian S, Smith RJ, Weitz IC. Atypical haemolytic-uraemic syndrome due to heterozygous mutations of CFH/CFHR1-3 and complement factor H 479. *Blood Transfus*. 2014;12(1):111-113.
25. Jung S, Kang ES, Ki CS, Kim DW, Paik KH, Chang YS. Successful therapeutic plasma exchange in a 3.2-kg body weight neonate with atypical hemolytic uremic syndrome. *J Clin Apher*. 2011;26(3):162-165.
26. Nürnberger J, Philipp T, Witzke O, et al. Eculizumab for atypical hemolytic-uremic syndrome. *N Engl J Med*. 2009;360(5):542-544.
27. Johnson SA, Williams JM, Hakobyan S, et al. Impact of compound heterozygous complement factor H mutations on development of atypical hemolytic uremic syndrome-A pedigree revisited. *Mol Immunol*. 2010;47(7-8):1585-1591.
28. Saland JM, Emre SH, Shneider BL, et al. Favorable long-term outcome after liver-kidney transplant for recurrent hemolytic uremic syndrome associated with a factor H mutation. *Am J Transplant*. 2006;6(8):1948-1952.
29. Cho HY, Lee BS, Moon KC, Ha IS, Cheong HI, Choi Y. Complete factor H deficiency-associated atypical hemolytic uremic syndrome in a neonate. *Pediatr Nephrol*. 2007;22(6):874-880.
30. Noris M, Remuzzi G. Atypical hemolytic-uremic syndrome. *N Engl J Med*. 2009;361(17):1676-1687.
31. Abarrategui-Garrido C, Melgosa M, Peña-Carrión A, et al. Mutations in proteins of the alternative pathway of complement and the pathogenesis of atypical hemolytic uremic syndrome. *Am J Kidney Dis*. 2008;52(1):171-180.
32. Lopes D, Gomes AM, Cunha C, Pinto CS, Fidalgo T, Fernandes JC. New combined CFH/MCP mutations and a rare clinical course in atypical haemolytic uraemic syndrome. *Clin Kidney J*. 2015;8(6):695-697.
33. Remuzzi G, Ruggenenti P, Codazzi D, et al. Combined kidney and liver transplantation for familial haemolytic uraemic syndrome. *Lancet*. 2002;359(9318):1671-1672.
34. Chua S, Wong G, Lim WH. The importance of genetic mutation screening to determine retransplantation following failed kidney allograft from recurrent atypical haemolytic uraemic syndrome. *BMJ Case Rep*. 2014;2014.
35. Bresin E, Rurali E, Caprioli J, et al. Combined complement gene mutations in atypical hemolytic uremic syndrome influence clinical phenotype. *J Am Soc Nephrol*. 2013;24(3):475-486.
36. Lee JM, Park YS, Lee JH, et al. Atypical hemolytic uremic syndrome: Korean pediatric series. *Pediatr Int*. 2015;57(3):431-438.

### Supplementary Table 3. FH variants with expression defects.

| Transcript | Protein | Abnormality found | Variant previously associated with expression problems |
|------------|---------|-------------------|--------------------------------------------------------|
| c.400T>C   | W134R   | W (a)             | No                                                     |
| c.974G>A   | C325Y   | W                 | No                                                     |
| c.1064A>C  | Y355S   | W                 | No                                                     |
| c.1189G>A  | G397R   | W                 | Yes <sup>1</sup>                                       |
| c.1292G>A  | C431Y   | W                 | Yes <sup>2</sup>                                       |
| c.1343G>A  | C448Y   | W                 | Yes <sup>3</sup>                                       |
| c.2695T>G  | Y899D   | W                 | Yes <sup>4</sup>                                       |
| c.2918G>A  | C973Y   | W                 | Yes <sup>5</sup>                                       |
| c.3231T>G  | C1077W  | W                 | Yes <sup>6</sup>                                       |
| c.3454T>A  | C1152S  | F                 | Yes <sup>7</sup>                                       |
| c.3469T>C  | W1157R  | F                 | No                                                     |
| c.3481C>A  | P1161T  | W                 | No                                                     |
| c.3489C>G  | C1163W  | F                 | No                                                     |
| c.3493C>T  | H1165Y  | F                 | No                                                     |
| c.3503T>C  | V1168A  | F                 | No                                                     |
| c.3581G>A  | G1194D  | W                 | No                                                     |
| c.3593A>T  | E1198V  | W                 | No                                                     |
| c.3595T>C  | F1199L  | F                 | No                                                     |

(a) **W**, Weak (decreased) intensity of band corresponding to FH in non-reducing SDS-PAGE; **F**, Failed to express *in vitro*.

#### References

1. Fakhouri F, Roumenina L, Provot F, et al. Pregnancy-Associated Hemolytic Uremic Syndrome Revisited in the Era of Complement Gene Mutations. *Journal of the American Society of Nephrology*. 2010;21(5):859-867.
2. Montes T, Goicoechea de Jorge E, Ramos R, et al. Genetic deficiency of complement factor H in a patient with age-related macular degeneration and membranoproliferative glomerulonephritis. *Molecular Immunology*. 2008;45(10):2897-2904.
3. Szarvas N, Szilágyi Á, Csuka D, et al. Genetic analysis and functional characterization of novel mutations in a series of patients with atypical hemolytic uremic syndrome. *Mol Immunol*. 2016;71:10-22.
4. Johnson SA, Williams JM, Hakobyan S, et al. Impact of compound heterozygous complement factor H mutations on development of atypical hemolytic uremic syndrome—A pedigree revisited. *Molecular Immunology*. 2010;47(7):1585-1591.
5. Saland JM, Emre SH, Shneider BL, et al. Favorable Long-Term Outcome after Liver-Kidney Transplant for Recurrent Hemolytic Uremic Syndrome Associated with a Factor H Mutation. *American Journal of Transplantation*. 2006;6(8):1948-1952.
6. Cho HY, Lee BS, Moon KC, Ha IS, Cheong HI, Choi Y. Complete factor H deficiency-associated atypical hemolytic uremic syndrome in a neonate. *Pediatr Nephrol*. 2007;22(6):874-880.
7. Sevinc M, Basturk T, Sahutoglu T, et al. Plasma resistant atypical hemolytic uremic syndrome associated with a CFH mutation treated with eculizumab: a case report. *Journal of Medical Case Reports*. 2015;9(1):92.

Supplemental Figure 1

## Identification of Factor H Variant

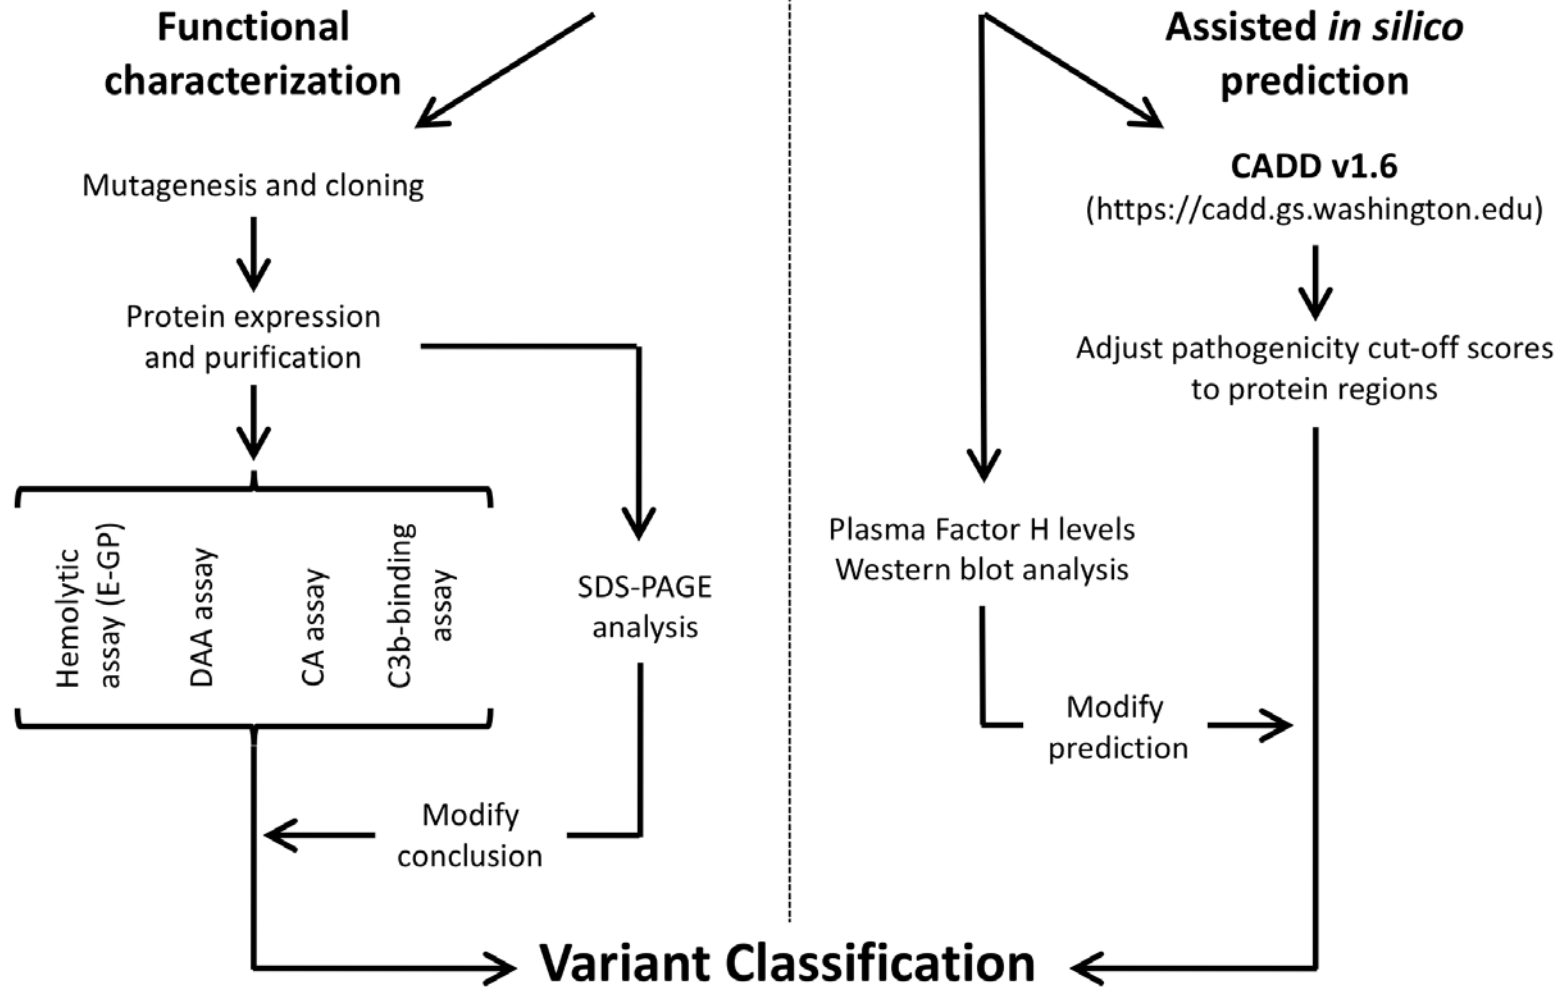

## Supplemental Figure 2

|                   |                                                                            |    |
|-------------------|----------------------------------------------------------------------------|----|
| SCR1 (20-81)      | DCNELPPRRNTEILT-G-SWSDQTYPEGTQAIYKCRPGYRSLGNVI---MVCRK-GEWVALNPLRKCQ       | 60 |
| SCR2 (82-142)     | KRPCGHPGDTPEGTFTLTG----GNVFEYGVKAVYTCNEGYQLLGEIN---YRECDTDGWTNDIPI--CE     | 57 |
| SCR3 (142-206)    | VVKCLPVTAPENGVKIVSSA-MEPDREYHFGQAVRFVCNSGYKIEGDEE---MHCSDDGFWWSKEKPK--CV   | 60 |
| SCR4 (207-263)    | EISCKSPD-VINGSPISQ-----KIIYKENERFOYKCNMGYEYS---ERGDVACTE-SGWRP-LPS--CE     | 53 |
| SCR5 (264-321)    | EKSCDNPY-IPNGDYSPL-----RIKHRTGDEITYQCRNGFYPATRG--NTAKCTS-TGWIP-APR--CT     | 54 |
| SCR6 (322-386)    | LKPCDYPD-IKHGGLYHENMRRPYFPVAVGKYYSYICDEHFETPSGSYWDHIHCTQ-DGWSP-AVP--CL     | 61 |
| SCR7 (387-445)    | RKCYFPY-LENGYNQNY-----GRKFVQGKSIDVACHPGYALPKAQ--TTVTCME-NGWSP-TPR--CIRV    | 54 |
| SCR8 (446-506)    | KTCSKSSIDIENGFISES-----QYTYALKEKAKYQCKLGYVTADGETSGSITCGKD-GWSA-QPT--CI     | 58 |
| SCR9 (507-565)    | KSCDIPVF-MNARTKND----FTWFKLNDTLD-YECHDGYESNTGSTTGSIVCGYN-GWSD-LPI--CY      | 56 |
| SCR10 (566-624)   | ERECELPK-IDVHLVPD----RKKDQYKVGVEVLKFSCKPGFTIV-GPNS--VQCYH-FGLSPDLPI--CK    | 55 |
| SCR11 (625-685)   | EQVQSCGPPPELLNGNVKE----KTKEEYGHSEVVEYYCNPFLMK-GPNKIQ--CVD--GEWTTLPV--CI    | 55 |
| SCR12 (686-745)   | VEESTCGDIPLELHCWAQL-----SSPPYYYGDSVEFNCSSEFTMI-CHRS--ITCIH--GVWTQLPQ--CV   | 54 |
| SCR13 (746-804)   | AIDKLLKCKS----SNLIILEE-HLKNKKEFDHNSNIRYRC-RGK---EGWIHTV--CIN--GRWDPEVN--CS | 51 |
| SCR14 (805-865)   | MAQIQLCPPPPQIPNSHN-----MTTTLNRYRDGEKVSVLCQENYLIQEGEE---ITCKD--GRWQSIPL--CV | 54 |
| SCR15 (866-927)   | EKIPCSQPPQIEHGTINS--SRSSQESYAHGTKLSYTCGGFRIS---EENETTCYM--GKWSSPPQ--CE     | 57 |
| SCR16 (928-985)   | GLPCKSPPEISHGVVAH-----MSDSYQYGEVVTYKCFEGFGID-GPAI--AKCL--GEKWSHPPS--CI     | 54 |
| SCR17 (986-1044)  | KTDCLSLPSFENAI PMG----EKKDVYKAGEQVTYTCATYKMD-GASN--VTCINS--RWTGRPT--CR     | 55 |
| SCR18 (1045-1103) | DTSCVNPPTVQNAIVS----RQMSKYPSGERVRYQCRSPYEMF-GDEE--VMCLN--GNWTEPPQ--CK      | 55 |
| SCR19 (1104-1164) | DSTGKCGPPPIDNGDITS----FPLSVYAPASSVEYQCQONLYQLE-GNKR--ITCRN--GQWSEPPK--CL   | 55 |
| SCR20 (1165-1231) | HPCVISREIMENYNIALRWTAKQKLYSRTGESVEFVCKRGYRLSSRSHTLRTTCWD--GKLE-YPT--CAKR   | 62 |

C--P---<sup>N</sup><sub>H</sub>G-----Y-G---<sup>Y</sup><sub>F</sub>C--<sup>Y</sup><sub>F</sub>G---G-----C---G-W---P---C

### SCR consensus sequence

Individual variant datasheets

# c.5G>C (R2T)

CADD: 6.11  
gnomAD:  $2 \times 10^{-5}$

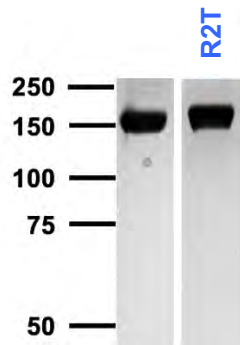

**Conclusion: Normal Function  
BENIGN**

Previous studies: None

### Comments:

Variant in the signal peptide. The electrophoretic mobility is similar to the wild type control and therefore this mutation does not appear to have interfered with normal signal peptide processing or secretion.

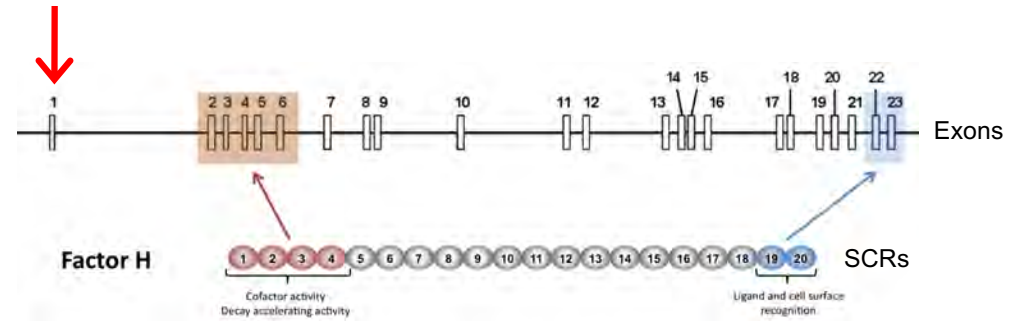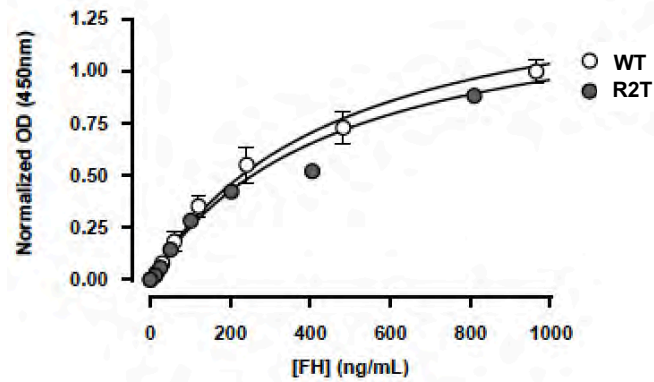

Binding to C3b

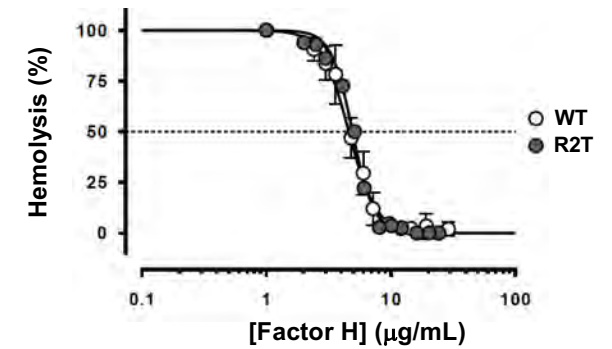

Hemolytic assay

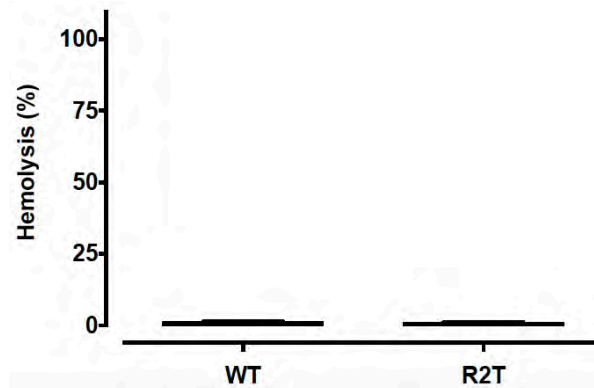

Cofactor activity

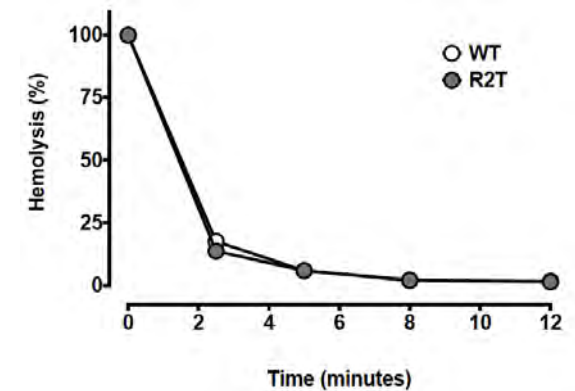

Decay-accelerating activity

# c.32T>C (M11T)

**CADD: 15.48**  
**gnomAD: Not Present**

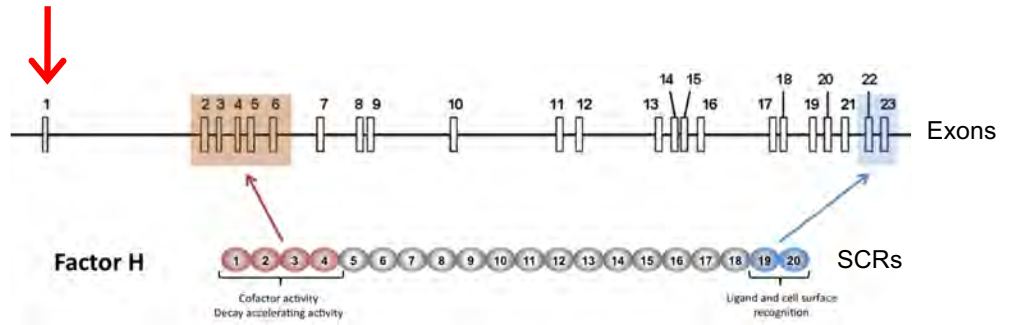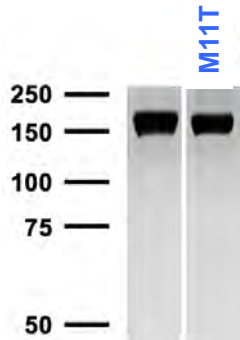

**SDS-PAGE**  
(Non-reduced)

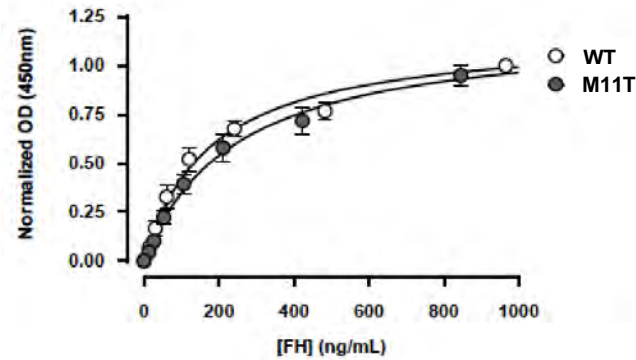

**Binding to C3b**

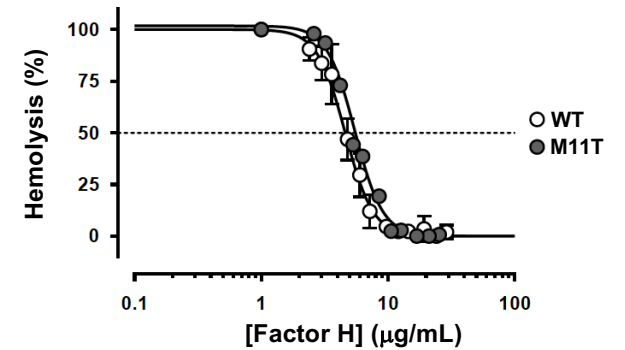

**Hemolytic assay**

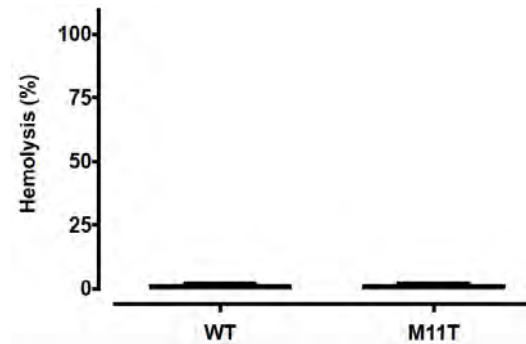

**Cofactor activity**

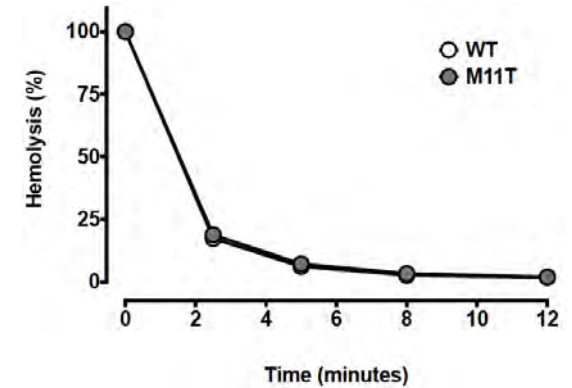

**Decay-accelerating activity**

**Conclusion: Normal Function**  
**BENIGN**

Previous studies: None

**Comments:**

Variant in the signal peptide. The electrophoretic mobility is similar to the wild type control and therefore this mutation does not appear to have interfered with normal signal peptide processing or secretion.



# c.157C>T (R53C)

**CADD: 24.4**  
**gnomAD:  $2 \times 10^{-5}$**

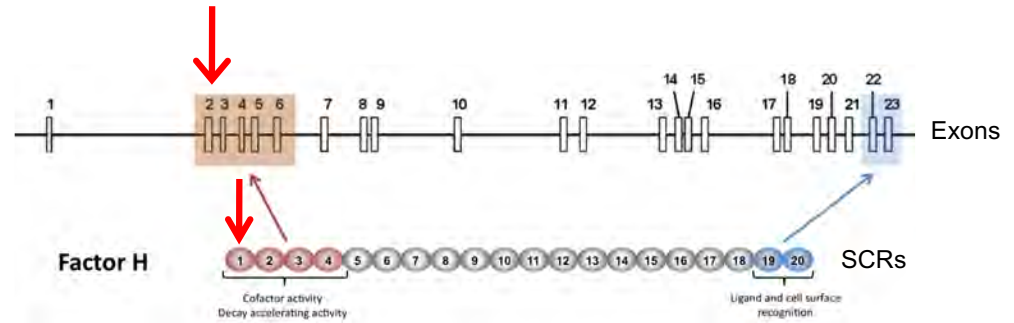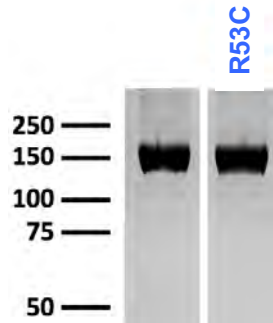

**SDS-PAGE**  
(Non-reduced)

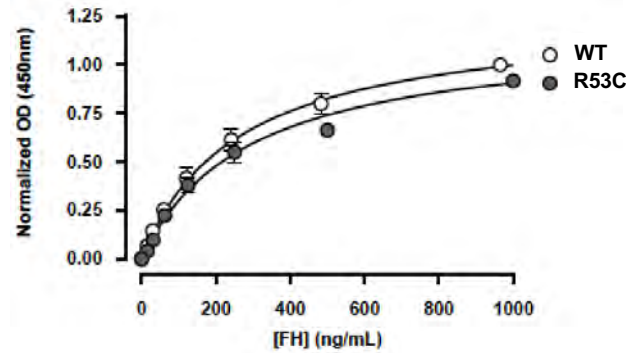

**Binding to C3b**

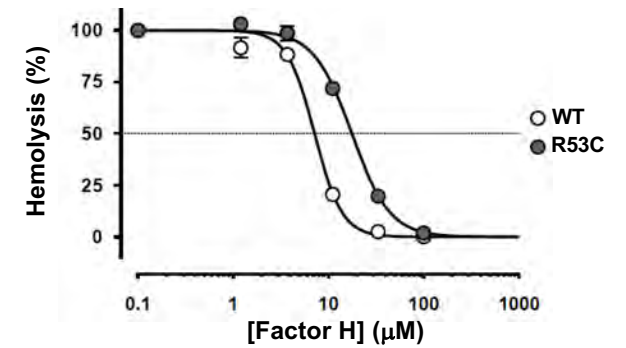

**Hemolytic assay**

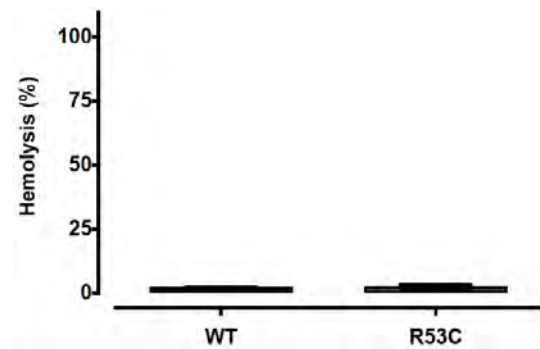

**Cofactor activity**

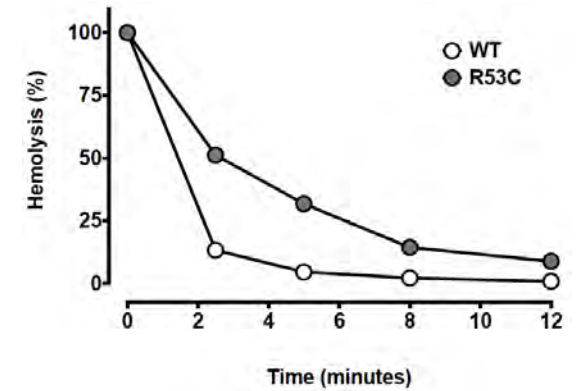

**Decay-accelerating activity**

**Conclusion: Impaired Function**  
**PATHOGENIC**

**Previous studies:** Pathogenic (Merinero HM, García SP, García-Fernández J, Arjona E, Tortajada A, Rodríguez de Córdoba S. Complete functional characterization of disease-associated genetic variants in the complement factor H gene. *Kidney International*. 2018;93(2):470-481).

**Comments:**

# c.184G>A (V62I)

**CADD: 7.11**  
**gnomAD:  $3 \times 10^{-1}$**

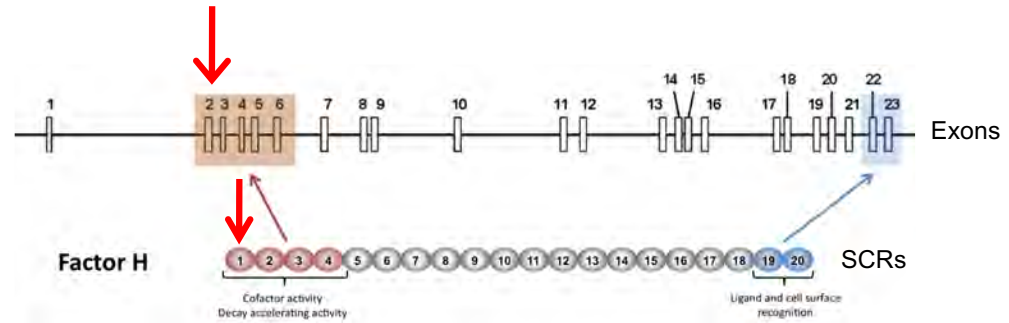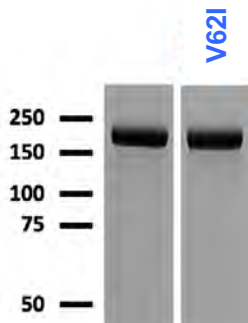

**SDS-PAGE**  
(Non-reduced)

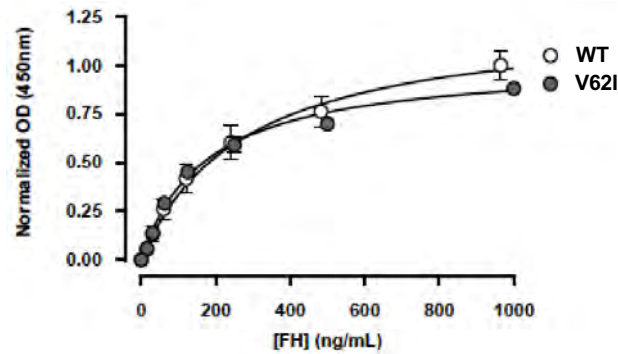

**Binding to C3b**

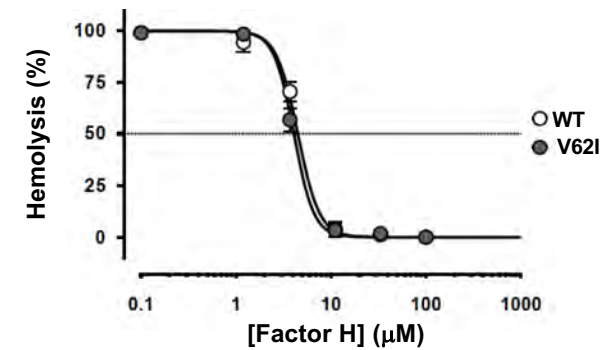

**Hemolytic assay**

**Conclusion: Normal Function**  
**BENIGN**

**Previous studies:** Benign in Tortajada A, Montes T, Martínez-Barricarte R, Morgan BP, Harris CL, de Córdoba SR. The disease-protective complement factor H allotypic variant Ile62 shows increased binding affinity for C3b and enhanced cofactor activity. *Hum Mol Genet.* 2009;18(18):3452-3461.

**Comments:**

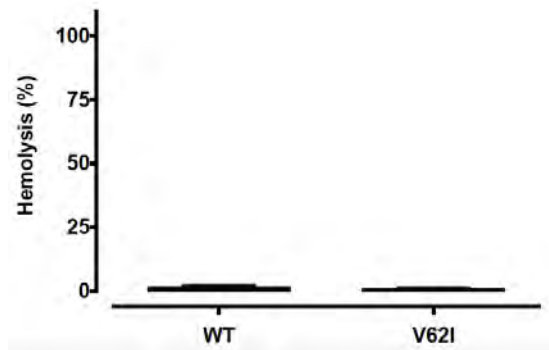

**Cofactor activity**

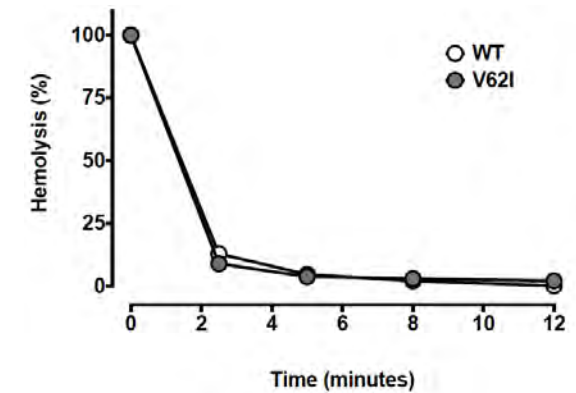

**Decay-accelerating activity**

# c.220C>T (L74F)

CADD: 13  
gnomAD:  $4 \times 10^{-6}$

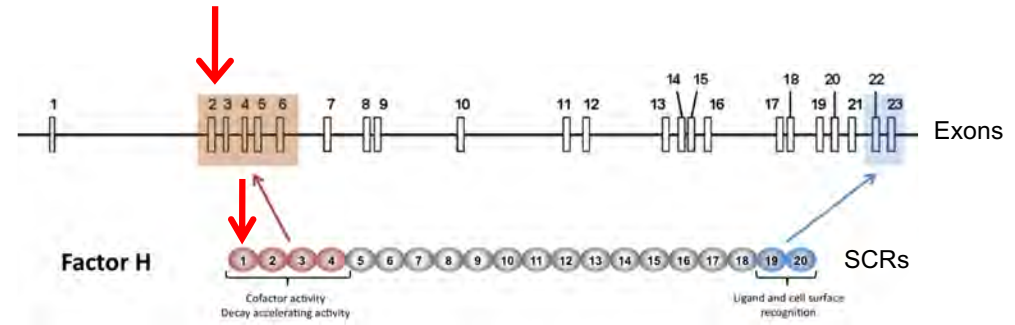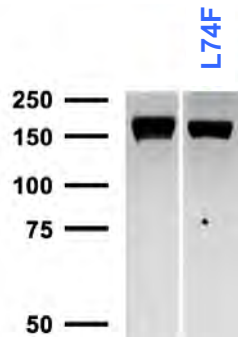

SDS-PAGE  
(Non-reduced)

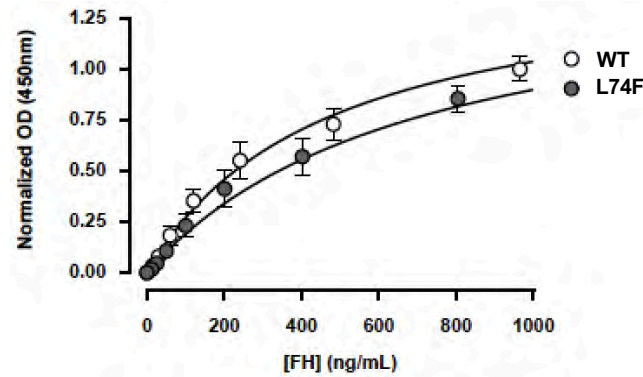

Binding to C3b

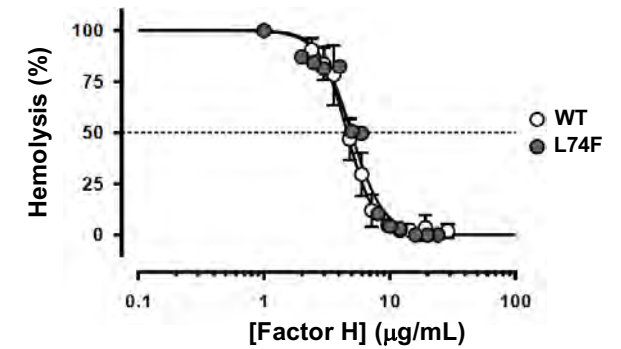

Hemolytic assay

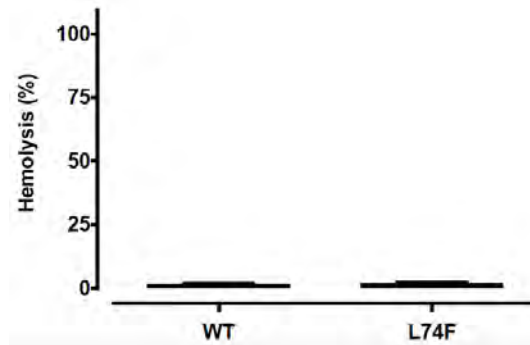

Cofactor activity

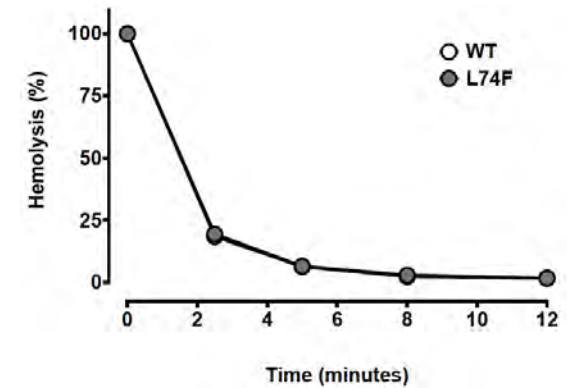

Decay-accelerating activity

**Conclusion:** Normal Function  
**BENIGN**

Previous studies: None

Comments:

# c.232A>G (R78G)

**CADD: 19.92**  
**gnomAD: Not Present**

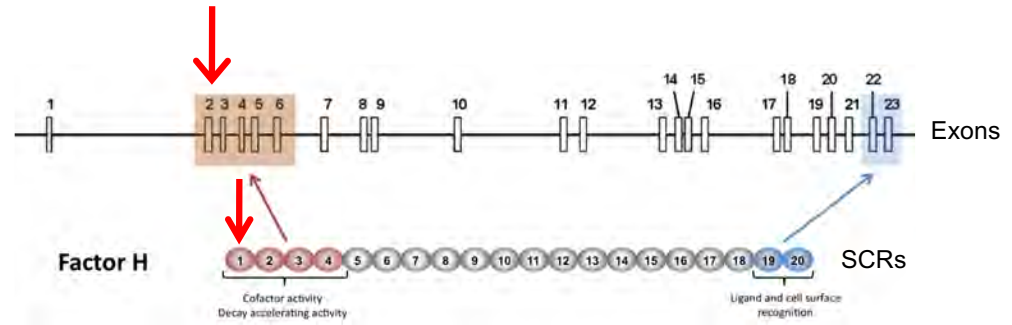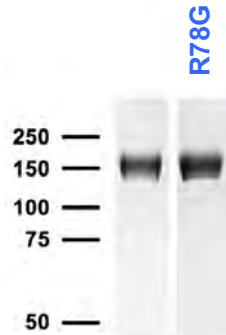

**SDS-PAGE**  
**(Non-reduced)**

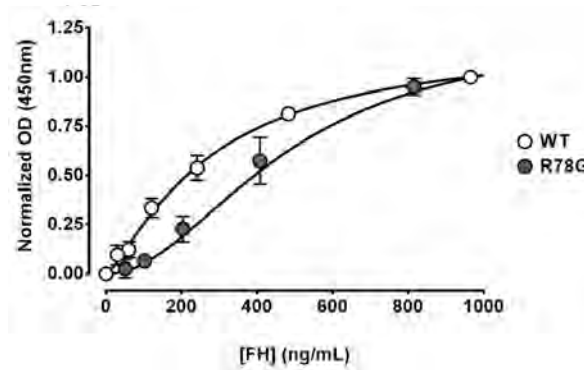

**Binding to C3b**

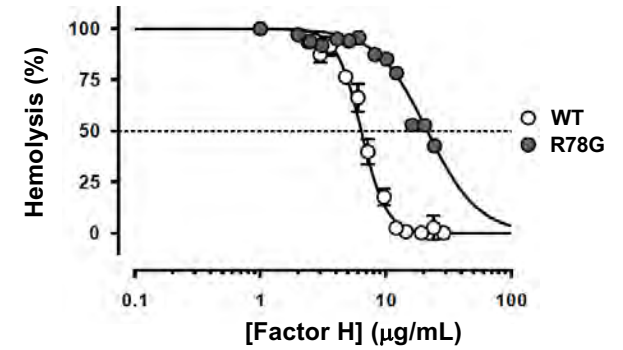

**Hemolytic assay**

**Conclusion: Impaired Function**  
**PATHOGENIC**

**Previous studies:** Pathogenic in Pechtl IC, Kavanagh D, McIntosh N, Harris CL, Barlow PN. Disease-associated N-terminal complement factor H mutations perturb cofactor and decay-accelerating activities. *J Biol Chem.* 2011;286(13):11082-11090.

**Comments:**

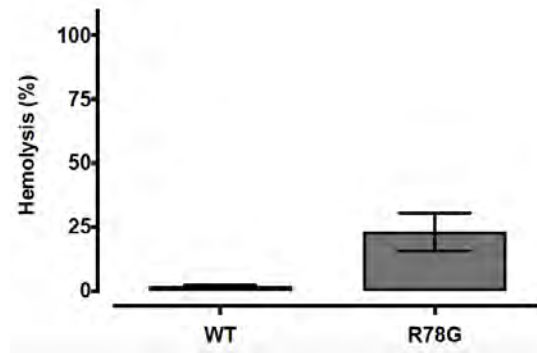

**Cofactor activity**

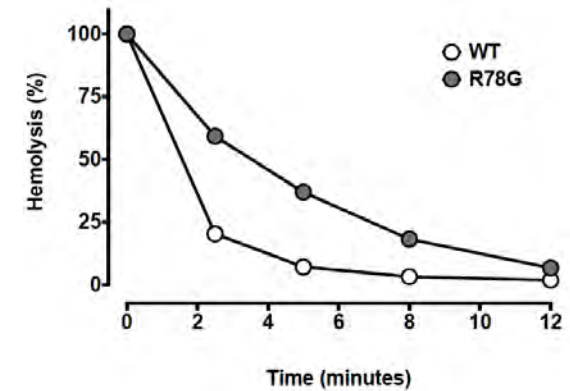

**Decay-accelerating activity**

# c.242A>C (Q81P)

CADD: 22.1  
gnomAD: Not present

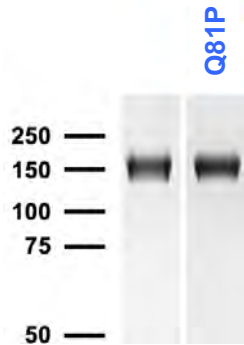

SDS-PAGE  
(Non-reduced)

Conclusion: Impaired Function  
PATHOGENIC

Previous studies: None

Comments:

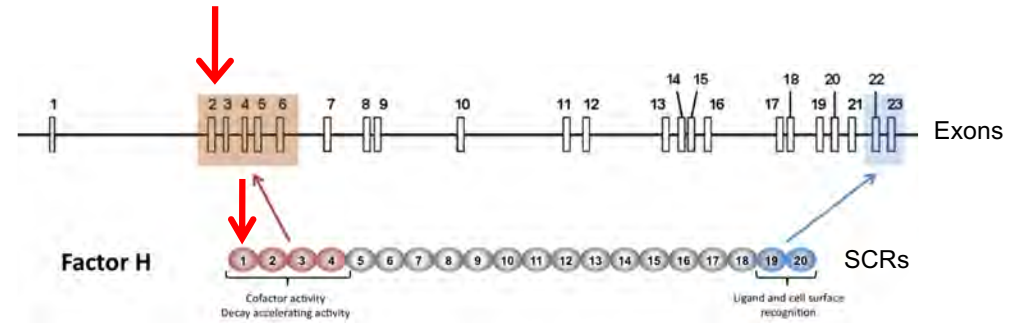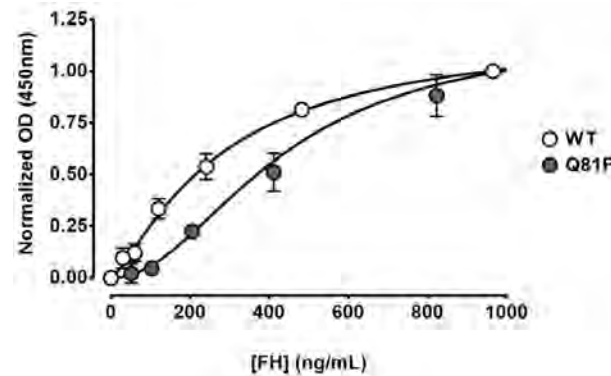

Binding to C3b

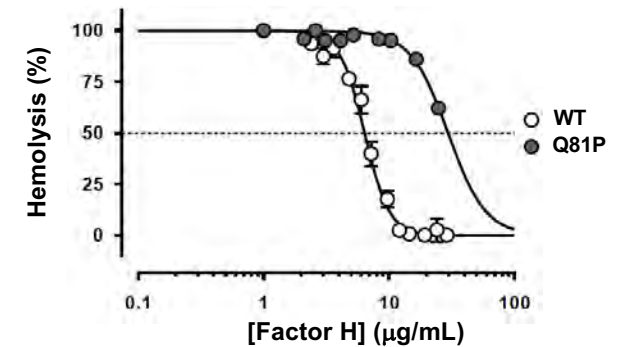

Hemolytic assay

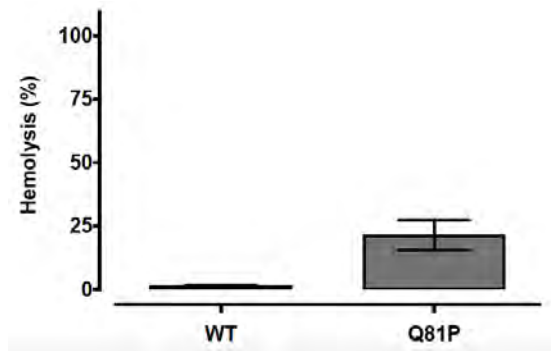

Cofactor activity

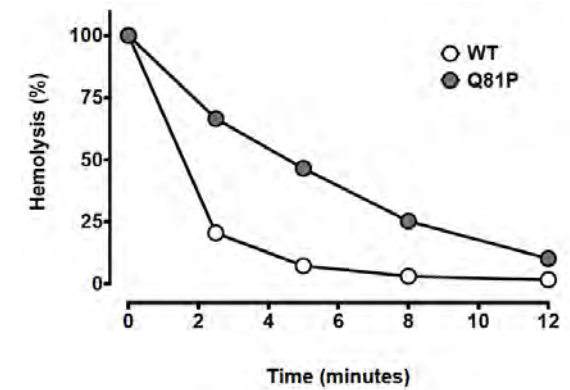

Decay-accelerating activity

# c.245A>G (K82R)

CADD: 22.1  
gnomAD:  $2 \times 10^{-5}$

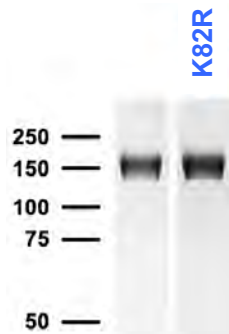

SDS-PAGE  
(Non-reduced)

**Conclusion: Normal Function  
BENIGN**

Previous studies: None

Comments:

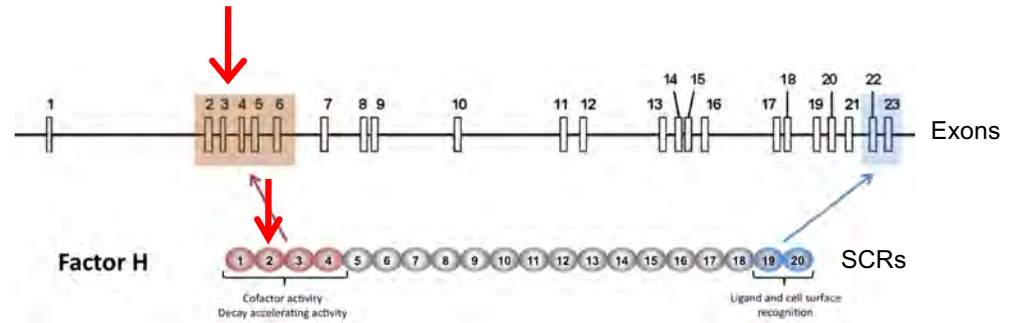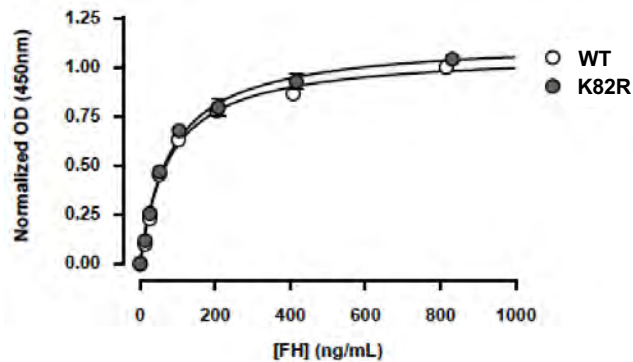

Binding to C3b

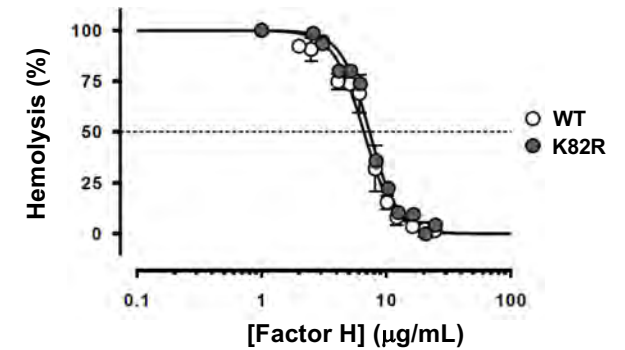

Hemolytic assay

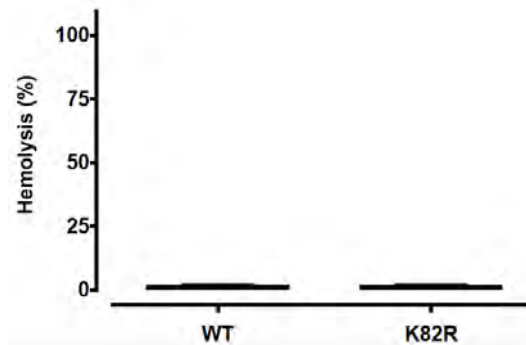

Cofactor activity

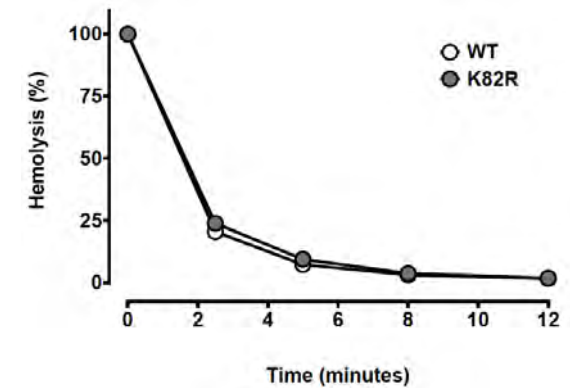

Decay-accelerating activity

# c.272C>G (T91S)

CADD: 19.9  
gnomAD:  $8 \times 10^{-6}$

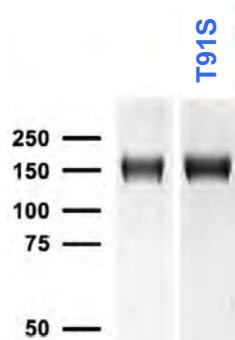

SDS-PAGE  
(Non-reduced)

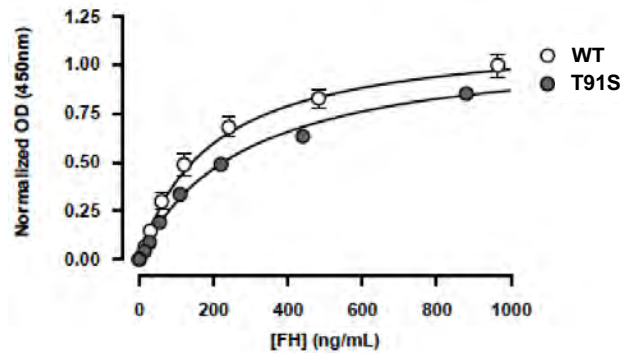

Binding to C3b

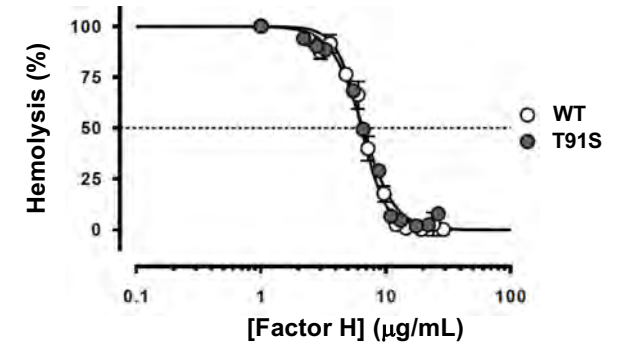

Hemolytic assay

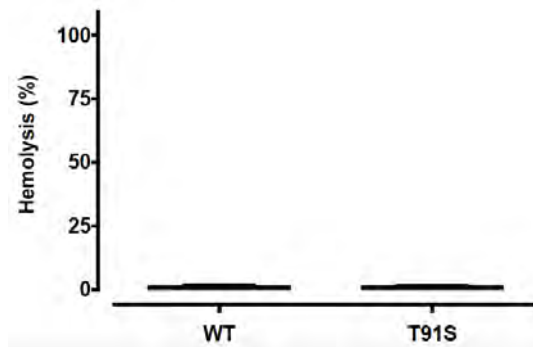

Cofactor activity

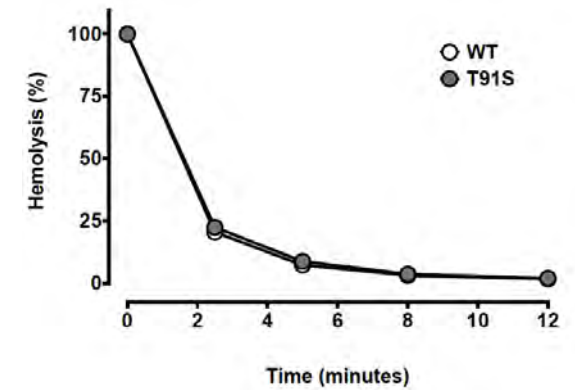

Decay-accelerating activity

Conclusion: Normal Function  
BENIGN

Previous studies: None

Comments:

# c.332T>A (V111E)

CADD: 26.3  
gnomAD:  $1 \times 10^{-4}$

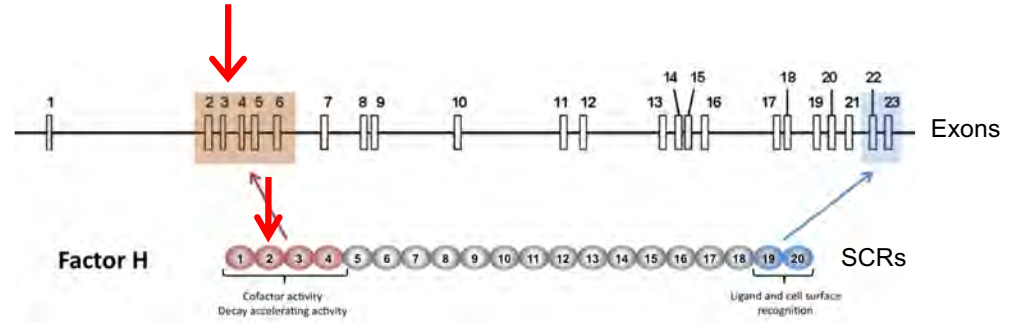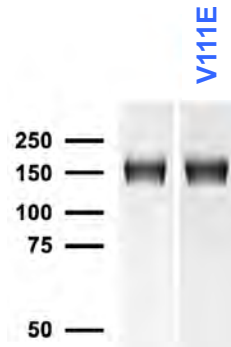

SDS-PAGE  
(Non-reduced)

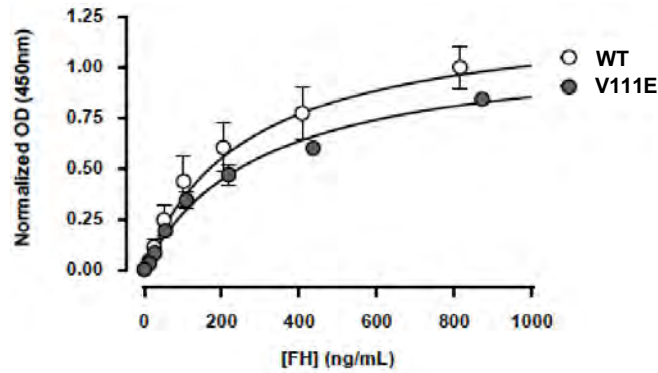

Binding to C3b

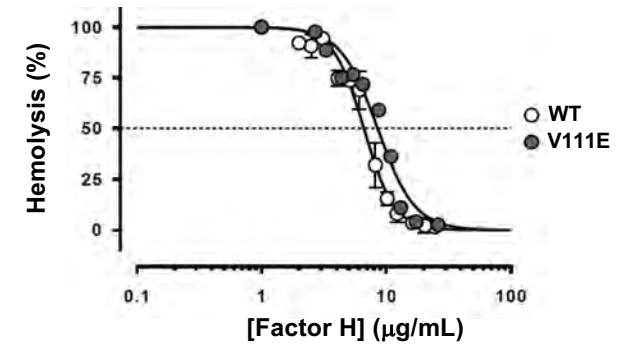

Hemolytic assay

Conclusion: Normal Function  
BENIGN

Previous studies: None

Comments:

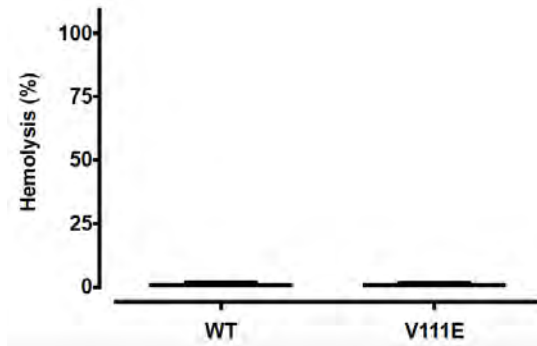

Cofactor activity

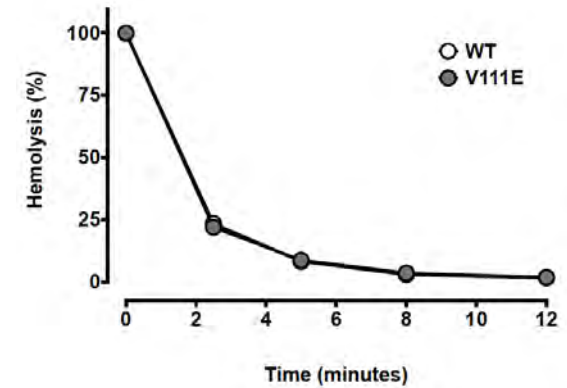

Decay-accelerating activity



# c.400T>C (W134R)

**CADD: 27.2**  
**gnomAD: Not present**

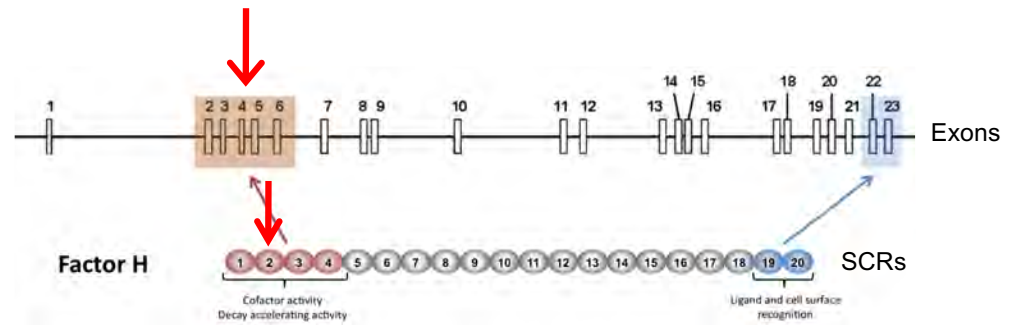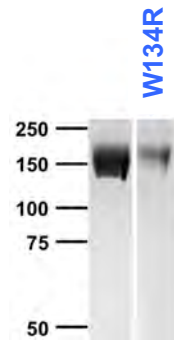

**SDS-PAGE**  
(Non-reduced)

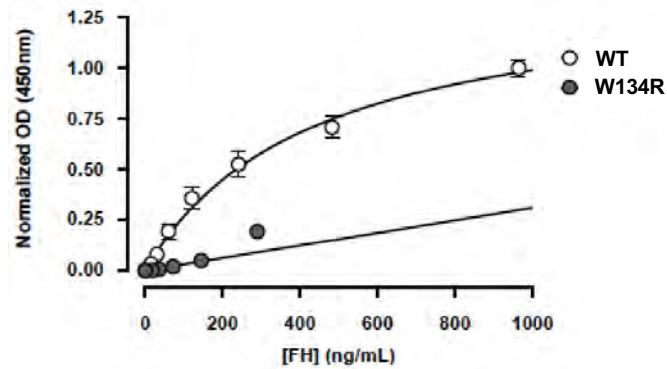

**Binding to C3b**

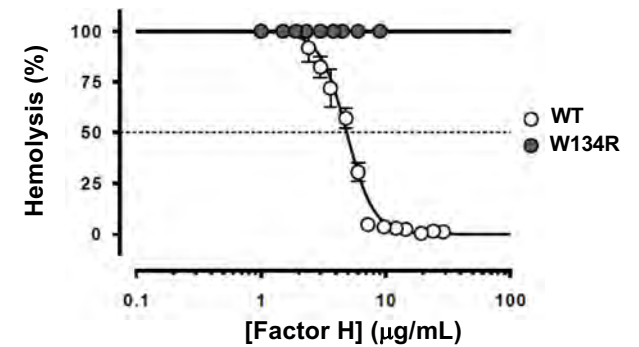

**Hemolytic assay**

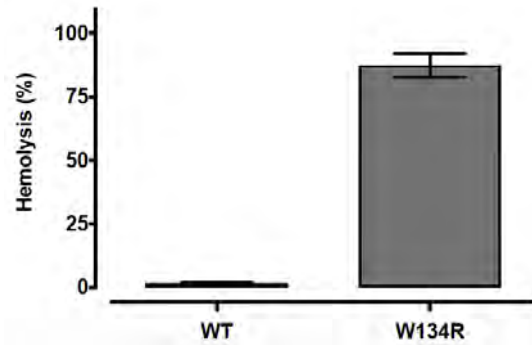

**Cofactor activity**

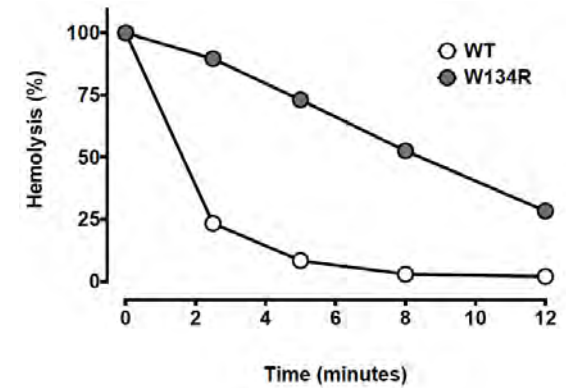

**Decay-accelerating activity**

**Conclusion:** Impaired Expression  
**PATHOGENIC**

Previous studies: None

**Comments:**

SDS-PAGE shows a weak FH band under non-reducing conditions, suggesting that this variant likely affects expression of the protein and results in a factor H deficiency

# c.451G>A (A151T)

**CADD: 3.28**  
**gnomAD: 1x10<sup>-6</sup>**

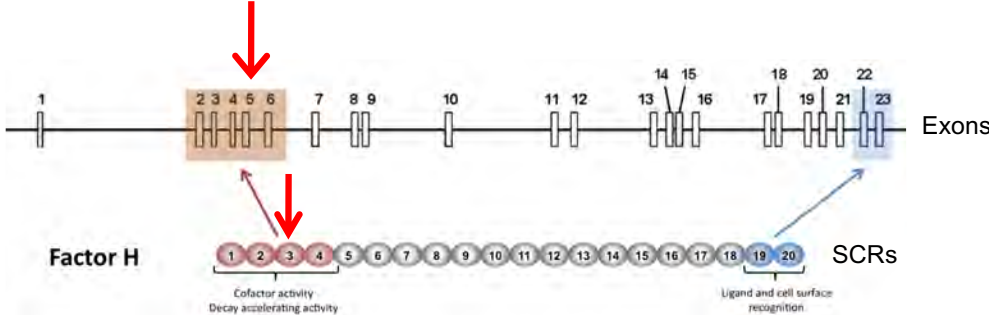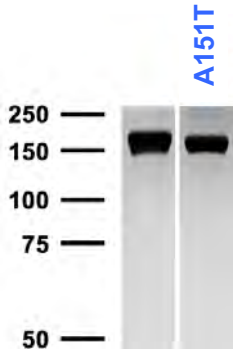

**SDS-PAGE**  
(Non-reduced)

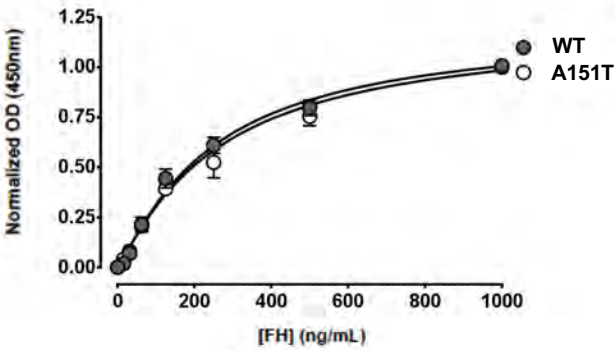

**Binding to C3b**

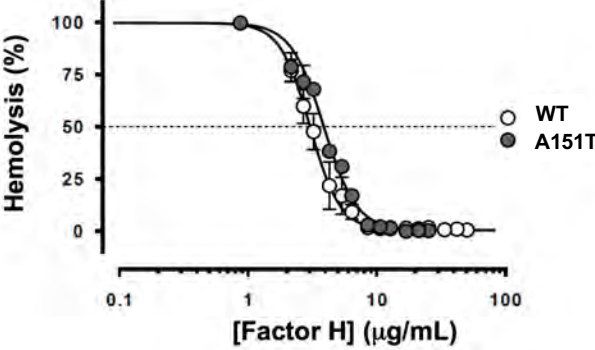

**Hemolytic assay**

**Conclusion: Normal Function**  
**BENIGN**

Previous studies: None

Comments:

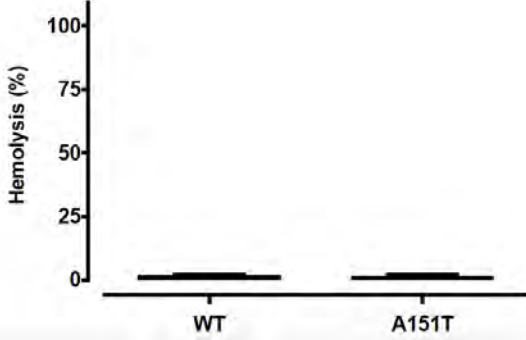

**Cofactor activity**

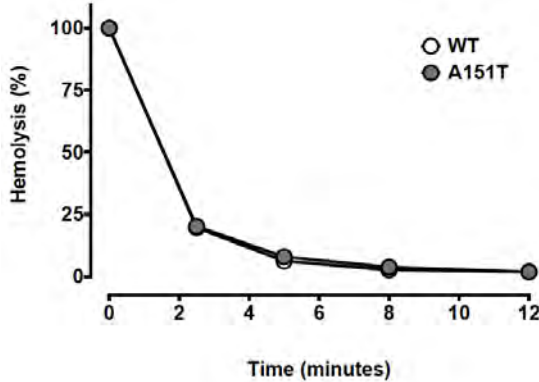

**Decay-accelerating activity**

# c.472G>A (V158I)

CADD: 0  
gnomAD:  $1 \times 10^{-4}$

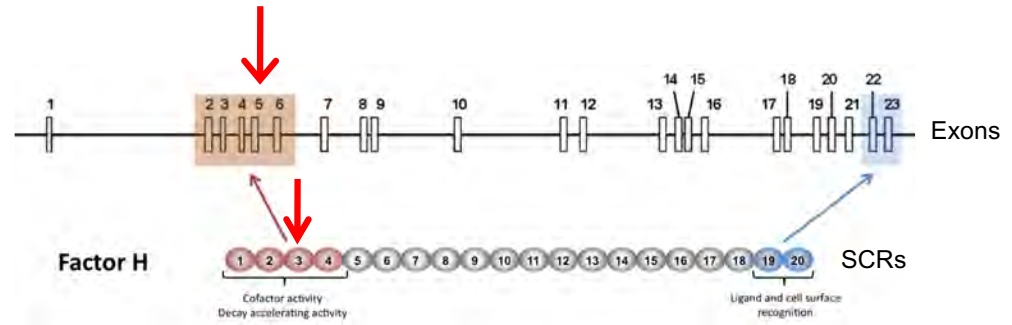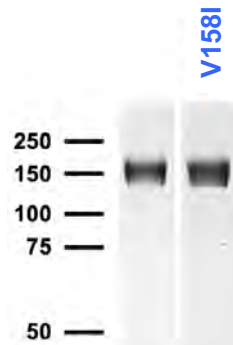

SDS-PAGE  
(Non-reduced)

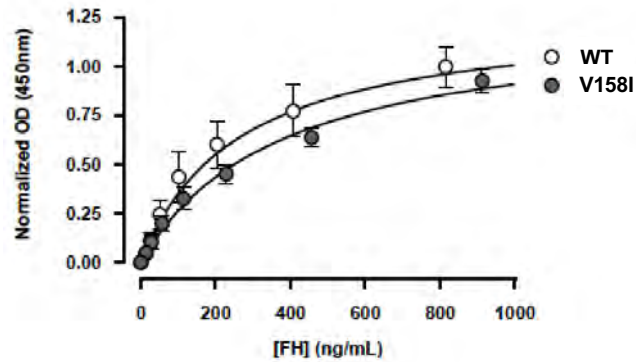

Binding to C3b

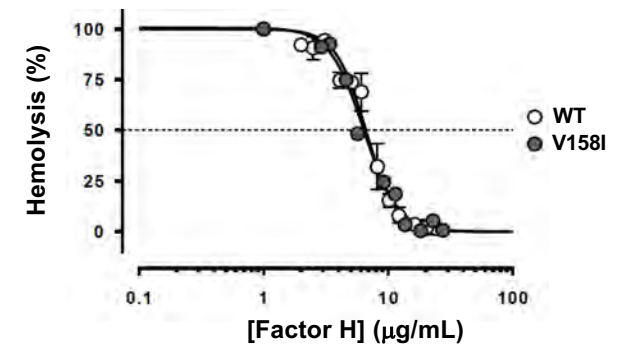

Hemolytic assay

Conclusion: Normal Function  
BENIGN

Previous studies: None

Comments:

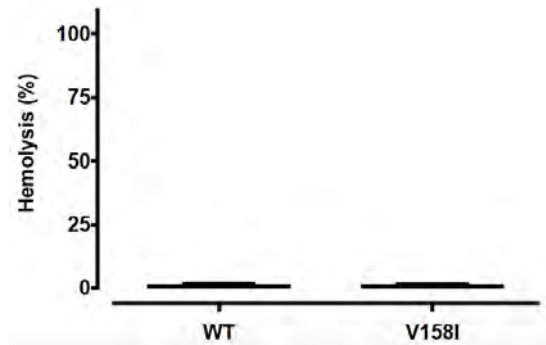

Cofactor activity

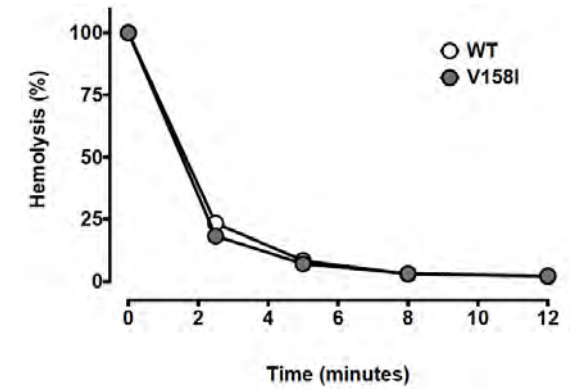

Decay-accelerating activity

# c.476G>A (S159N)

CADD: 16.65  
gnomAD:  $4 \times 10^{-5}$

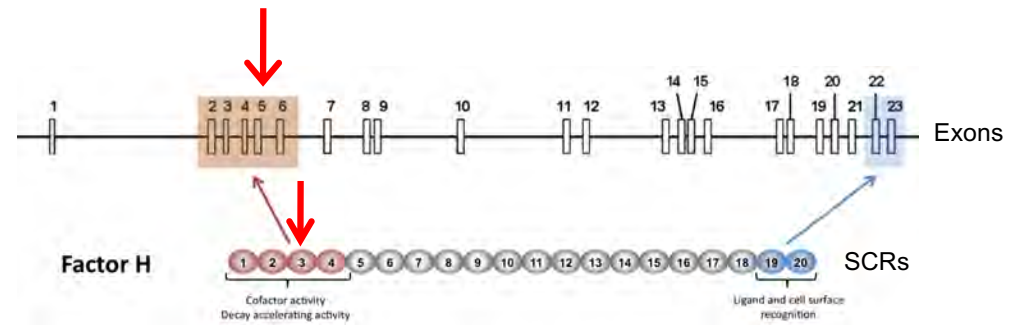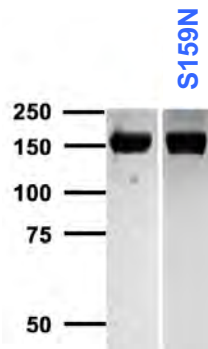

SDS-PAGE  
(Non-reduced)

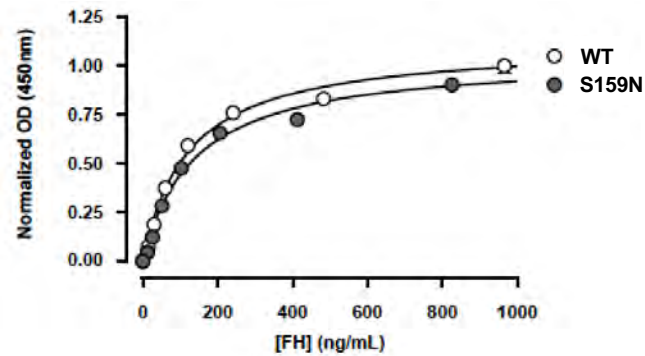

Binding to C3b

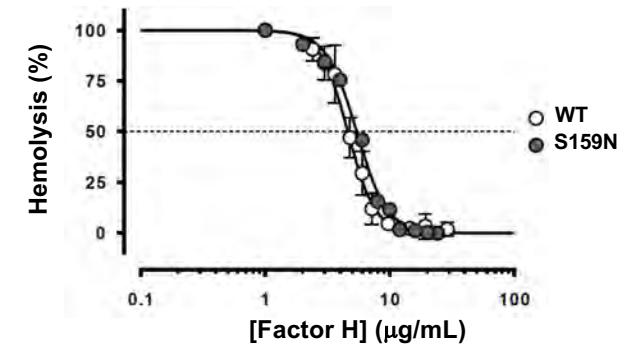

Hemolytic assay

**Conclusion: Normal Function  
BENIGN**

Previous studies: None

Comments:

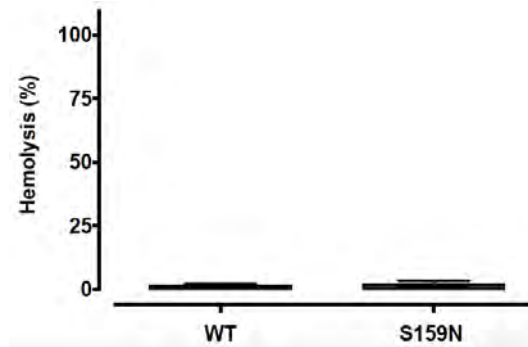

Cofactor activity

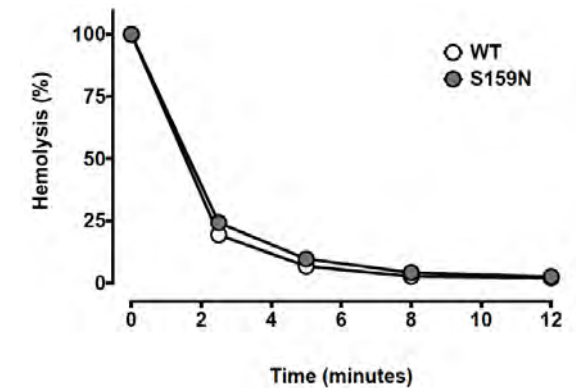

Decay-accelerating activity

# c.481G>T (A161S)

CADD: 11.9  
gnomAD:  $9 \times 10^{-5}$

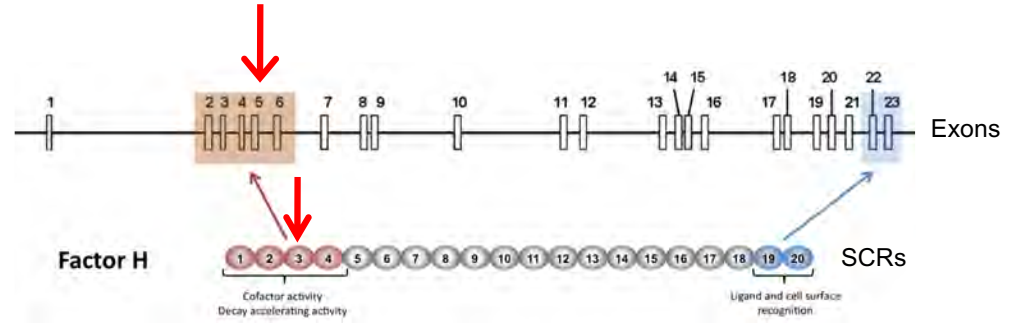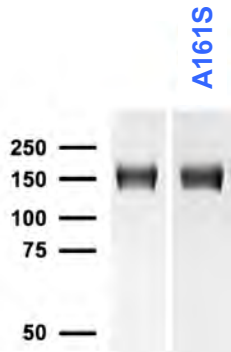

SDS-PAGE  
(Non-reduced)

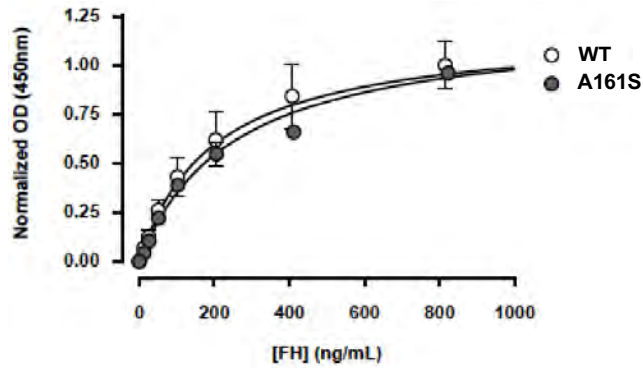

Binding to C3b

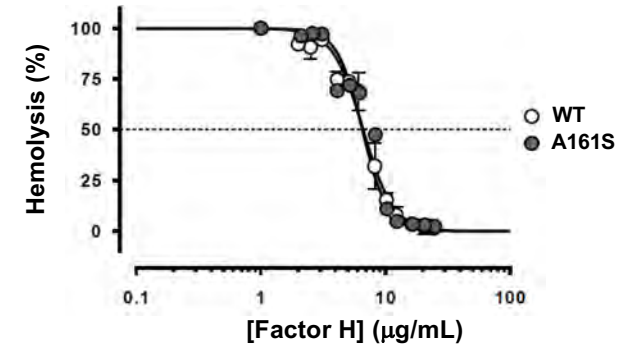

Hemolytic assay

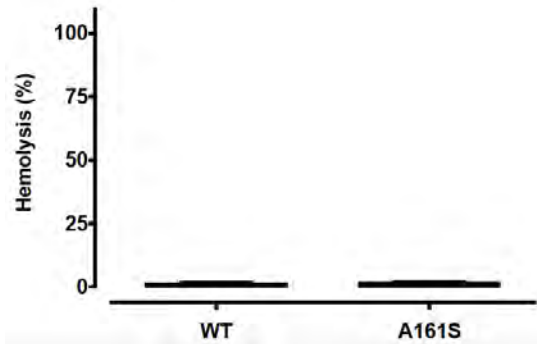

Cofactor activity

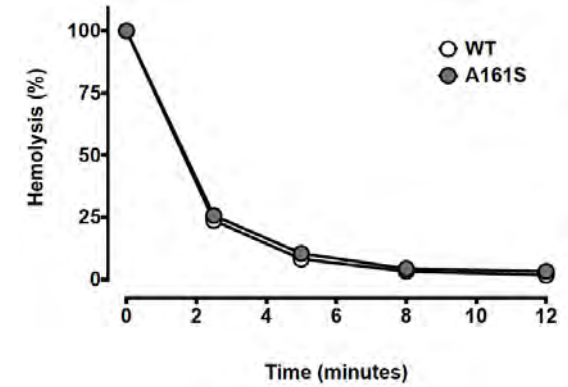

Decay-accelerating activity

**Conclusion: Normal Function**  
**BENIGN**

Previous studies: None

Comments:

# c.484A>G (M162V)

CADD: 0  
gnomAD:  $3 \times 10^{-5}$

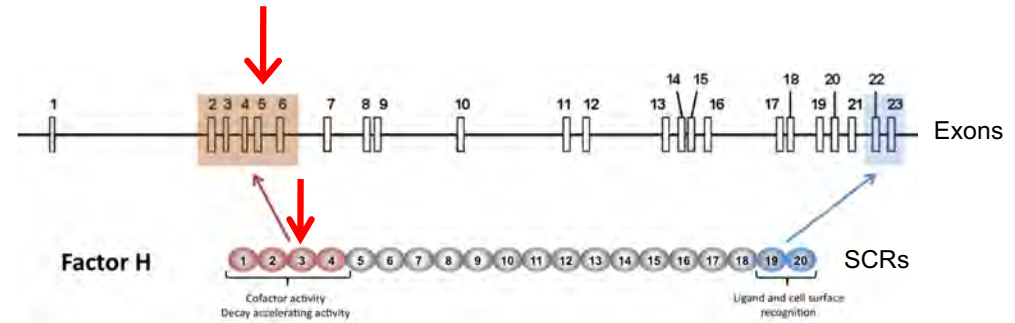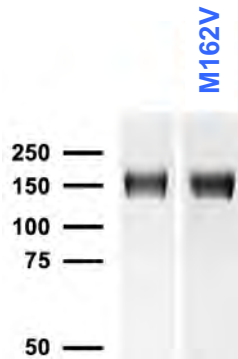

SDS-PAGE  
(Non-reduced)

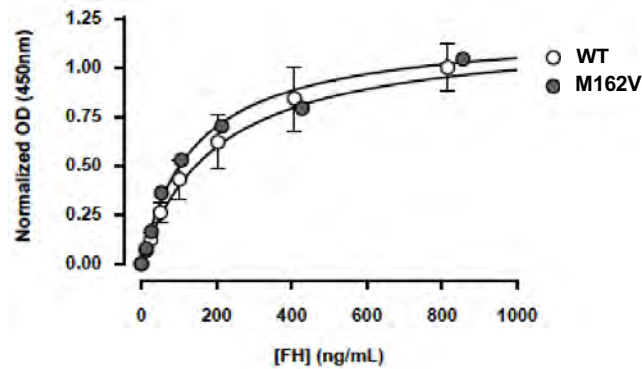

Binding to C3b

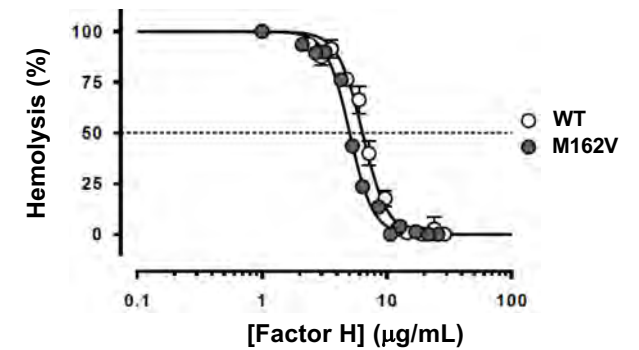

Hemolytic assay

**Conclusion: Normal Function**  
**BENIGN**

Previous studies: None

Comments:

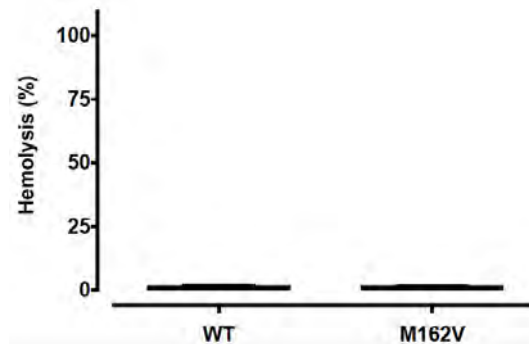

Cofactor activity

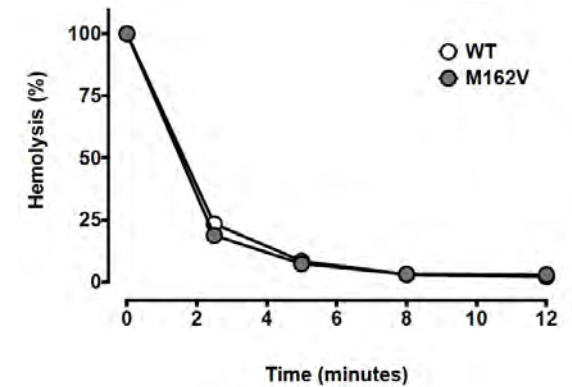

Decay-accelerating activity

# c.497G>T (R166L)

CADD: 17.01  
gnomAD:  $7 \times 10^{-6}$

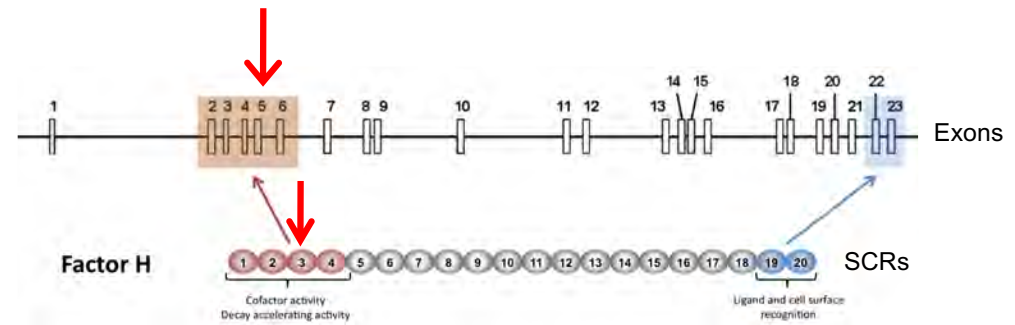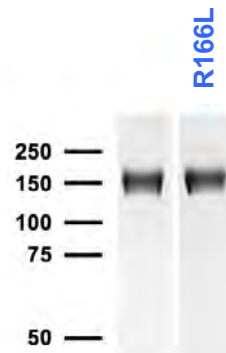

SDS-PAGE  
(Non-reduced)

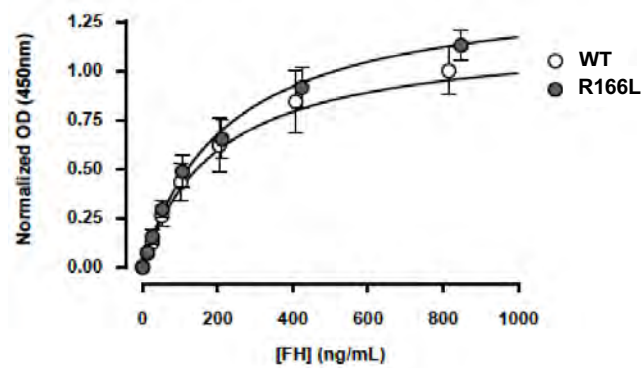

Binding to C3b

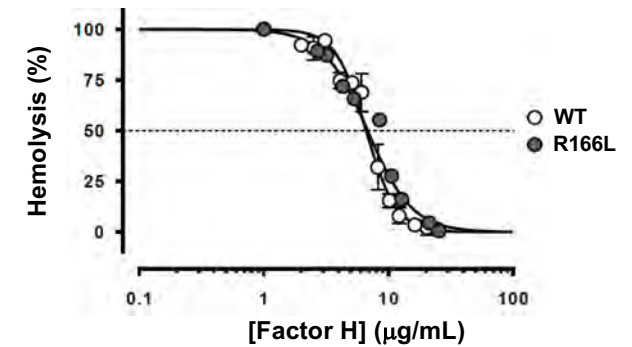

Hemolytic assay

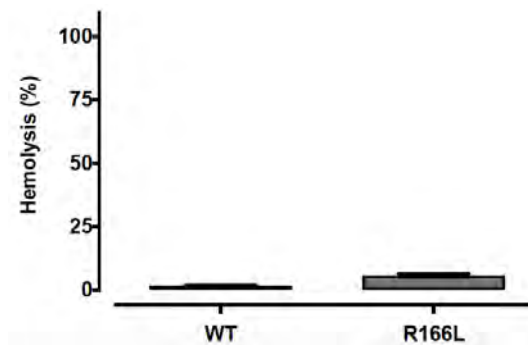

Cofactor activity

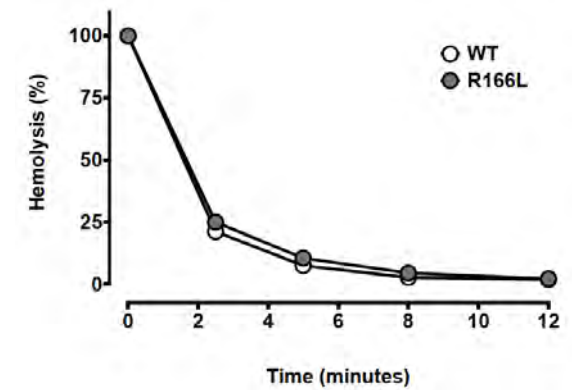

Decay-accelerating activity

**Conclusion:** Impaired Expression  
**PATHOGENIC**

Previous studies: None

Comments:

# c.524G>C (R175P)

**CADD: 7.15**  
**gnomAD:  $4 \times 10^{-6}$**

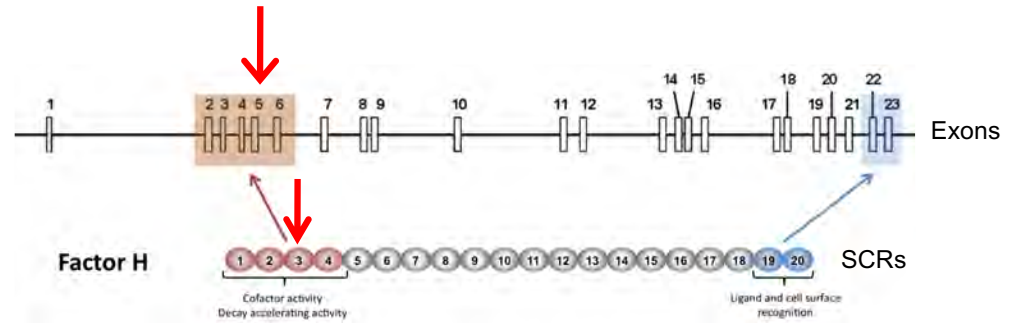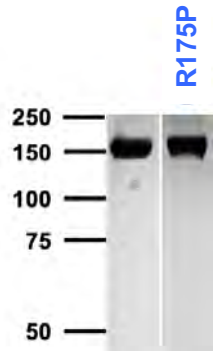

**SDS-PAGE**  
(Non-reduced)

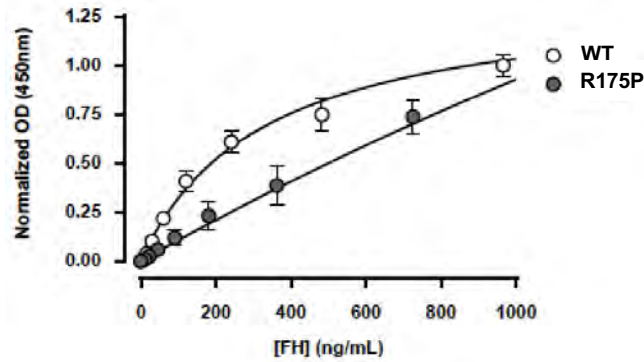

**Binding to C3b**

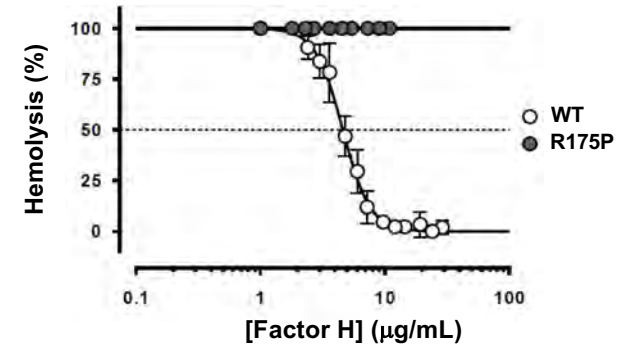

**Hemolytic assay**

**Conclusion: Impaired Function**  
**PATHOGENIC**

**Previous studies:** Pathogenic in Wagner EK, Raychaudhuri S, Villalonga MB, et al. Mapping rare, deleterious mutations in Factor H: Association with early onset, drusen burden and lower antigenic levels in familial AMD. *Scientific Reports*. 2016;6(1):31531.

Comments:

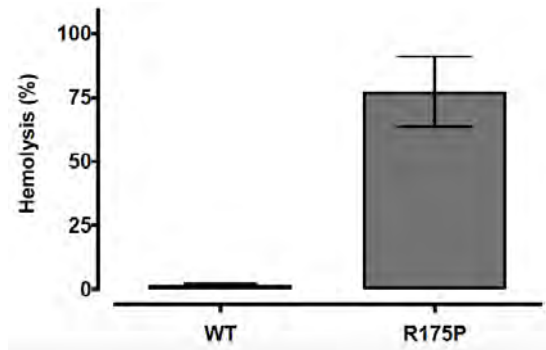

**Cofactor activity**

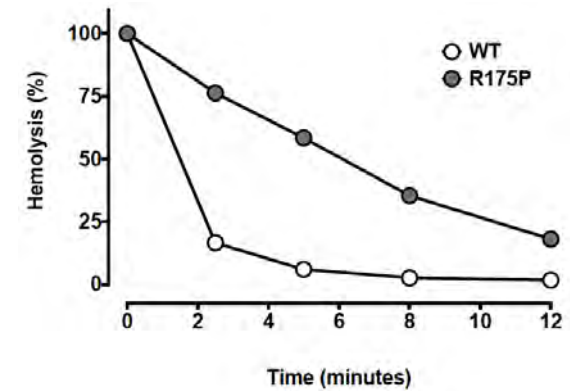

**Decay-accelerating activity**



# c.560A>T (D187V)

**CADD: 17.14**  
**gnomAD: Not present**

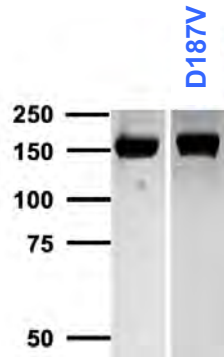

SDS-PAGE  
(Non-reduced)

**Conclusion: Normal Function**  
**BENIGN**

Previous studies: None

Comments:

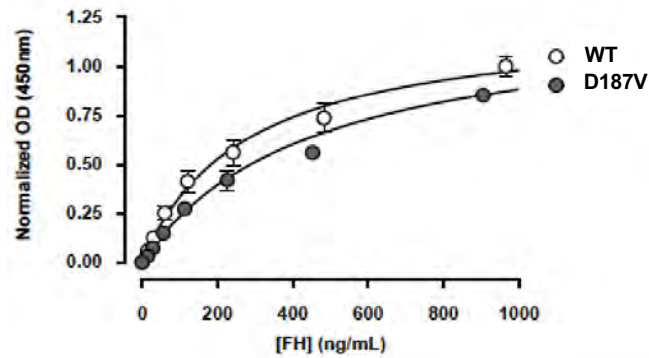

Binding to C3b

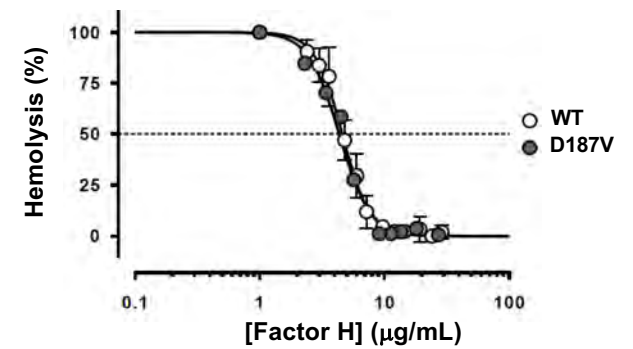

Hemolytic assay

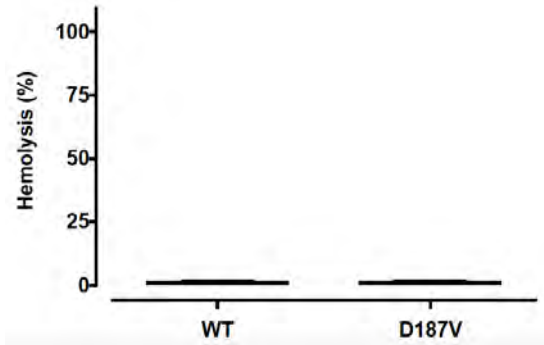

Cofactor activity

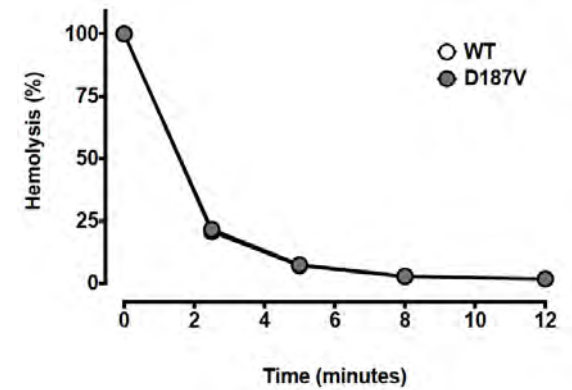

Decay-accelerating activity

# c.592T>C (W198R)

**CADD: 24.2**  
**gnomAD: Not present**

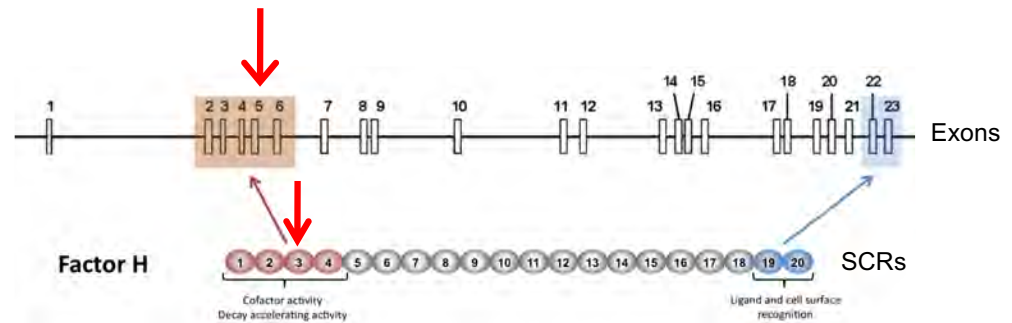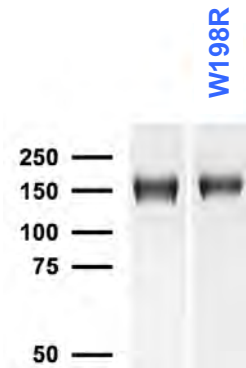

**SDS-PAGE**  
(Non-reduced)

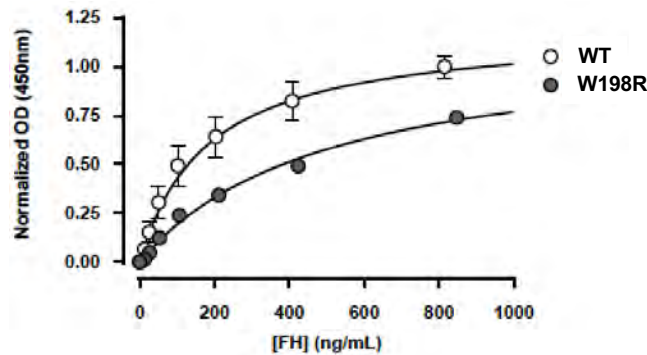

**Binding to C3b**

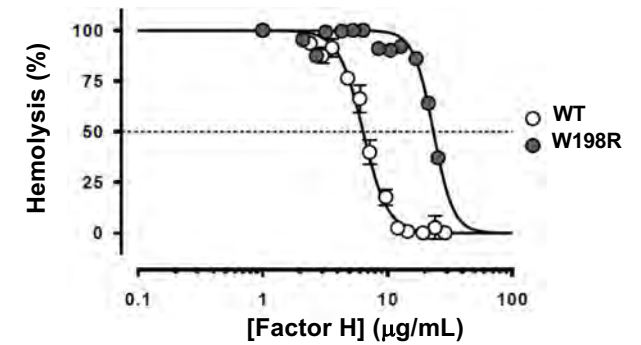

**Hemolytic assay**

**Conclusion: Impaired Expression**  
**PATHOGENIC**

**Previous studies:** Non expressed in Szarvas N, Szilágyi Á, Csuka D, et al. Genetic analysis and functional characterization of novel mutations in a series of patients with atypical hemolytic uremic syndrome. *Mol Immunol.* 2016;71:10-22.

**Comments:** SDS-PAGE shows a FH band with diminished intensity under non-reducing conditions, suggesting that this variant likely affects expression of the protein and results in a factor H deficiency.

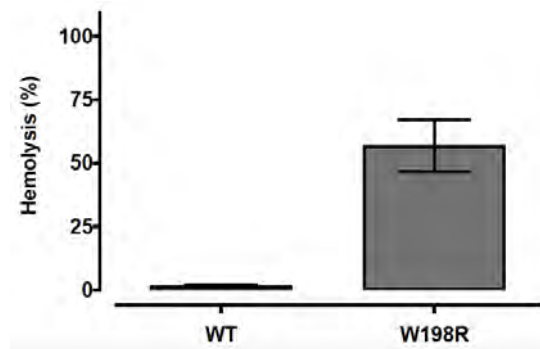

**Cofactor activity**

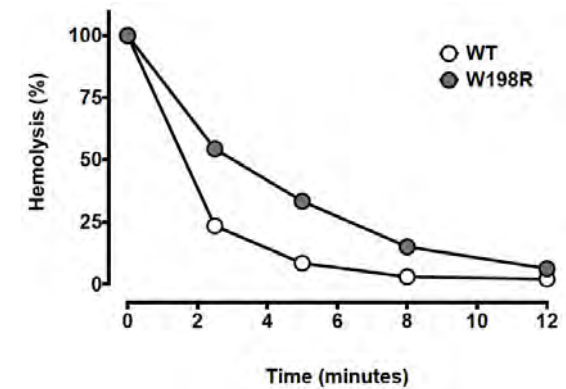

**Decay-accelerating activity**

# c.595A>G (S199G)

**CADD: 24.5**  
**gnomAD: Not present**

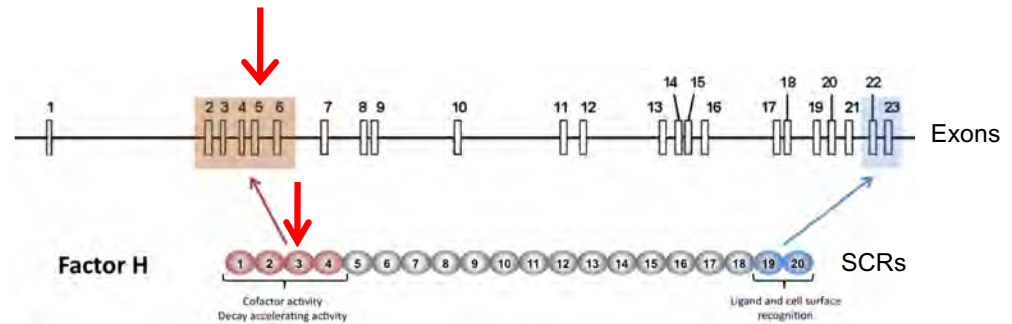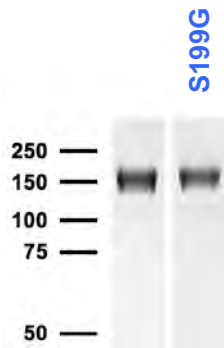

SDS-PAGE  
(Non-reduced)

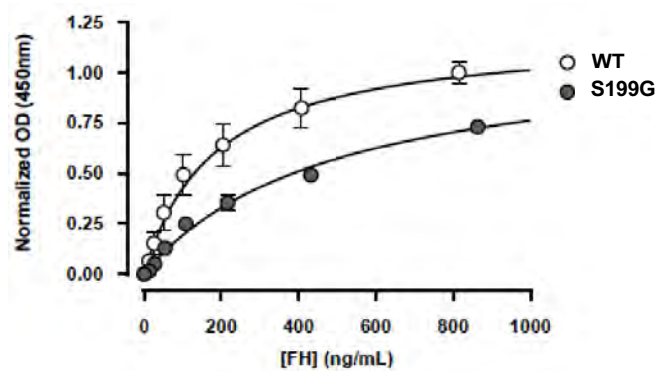

Binding to C3b

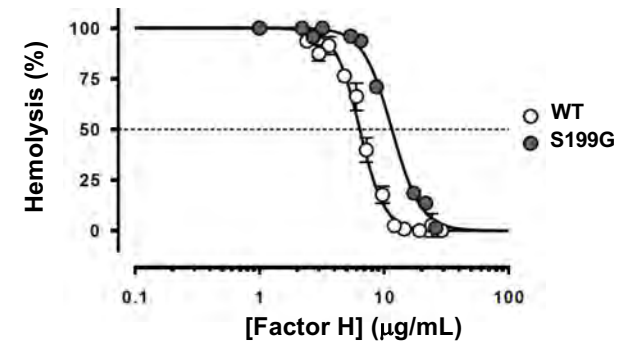

Hemolytic assay

**Conclusion: Impaired Expression**  
**PATHOGENIC**

Previous studies: None

**Comments:**

SDS-PAGE shows a FH band with diminished intensity under non-reducing conditions, suggesting that this variant likely affects expression of the protein and results in a factor H deficiency.

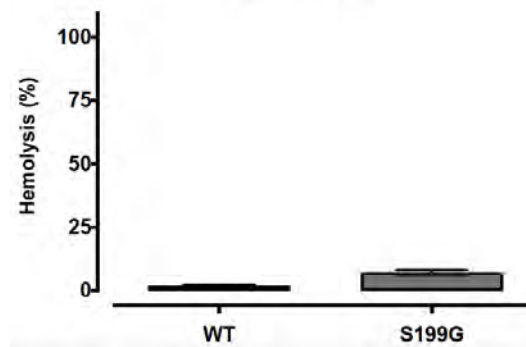

Cofactor activity

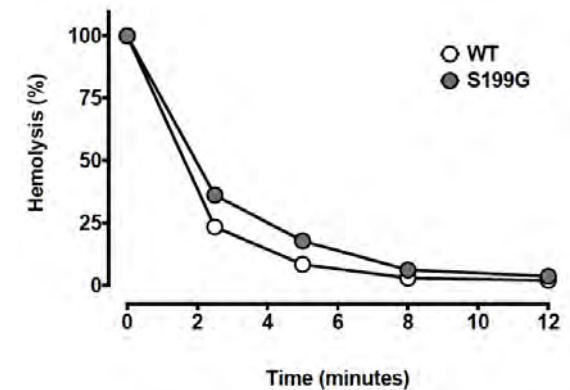

Decay-accelerating activity

# c.647T>C (I216T)

CADD: 0  
gnomAD:  $1 \times 10^{-4}$

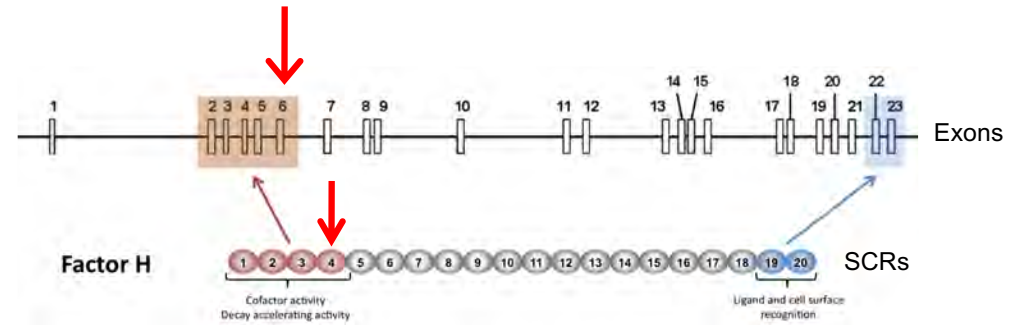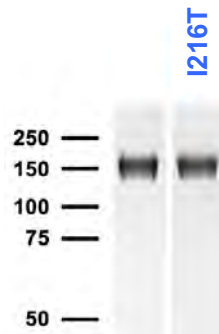

SDS-PAGE  
(Non-reduced)

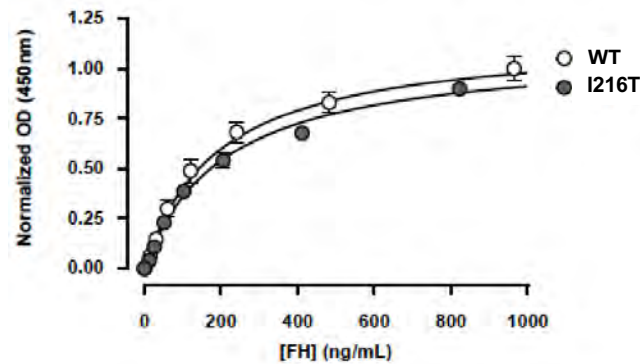

Binding to C3b

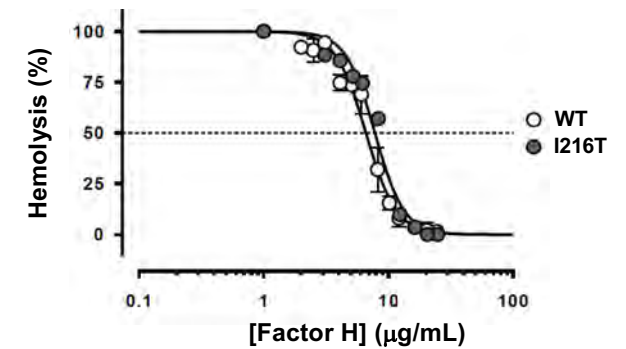

Hemolytic assay

**Conclusion: Normal Function**  
**BENIGN**

Previous studies: None

Comments:

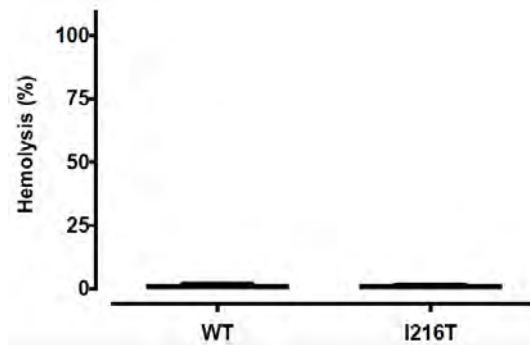

Cofactor activity

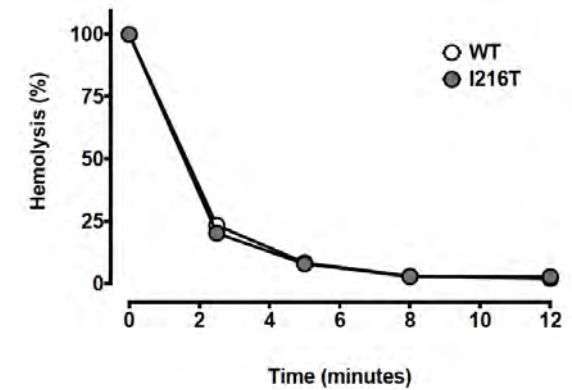

Decay-accelerating activity

# c.653G>A (G218E)

**CADD: 24.7**  
**gnomAD: Not present**

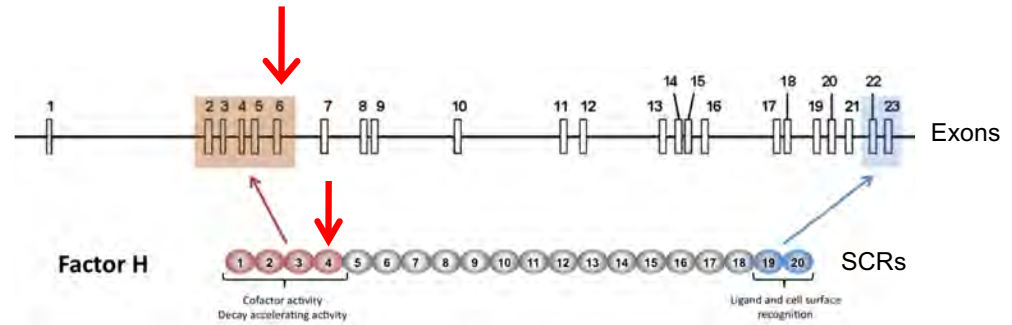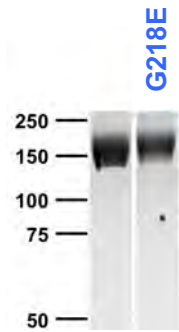

**SDS-PAGE**  
(Non-reduced)

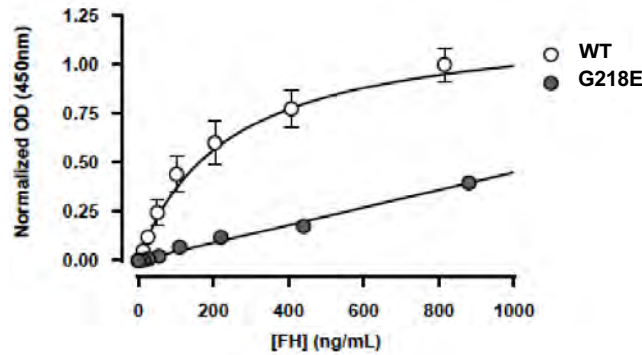

**Binding to C3b**

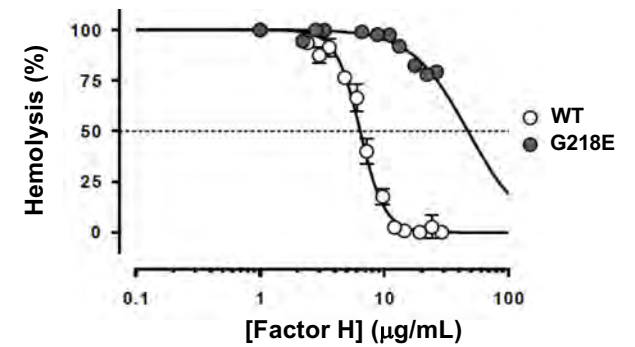

**Hemolytic assay**

**Conclusion: Impaired Expression**  
**PATHOGENIC**

**Previous studies:** Non expressed in Fakhouri F, Roumenina L, Provot F, et al. Pregnancy-Associated Hemolytic Uremic Syndrome Revisited in the Era of Complement Gene Mutations. *Journal of the American Society of Nephrology.* 2010;21(5):859-867.

**Comments:** SDS-PAGE shows a FH band with diminished intensity under non-reducing conditions, suggesting that this variant likely affects expression of the protein and results in a factor H deficiency.

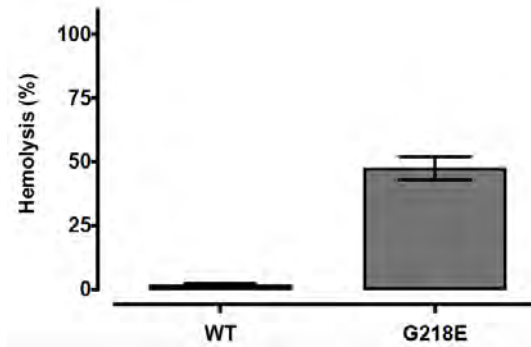

**Cofactor activity**

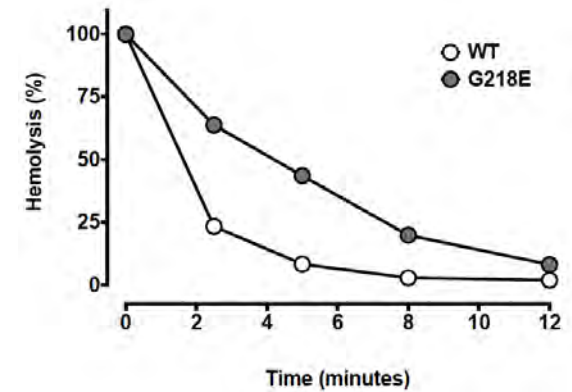

**Decay-accelerating activity**

# c.661A>G (I221V)

CADD: 0  
gnomAD:  $2 \times 10^{-5}$

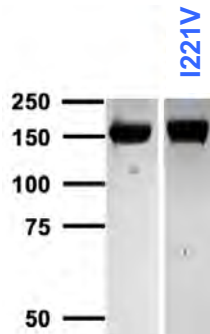

SDS-PAGE  
(Non-reduced)

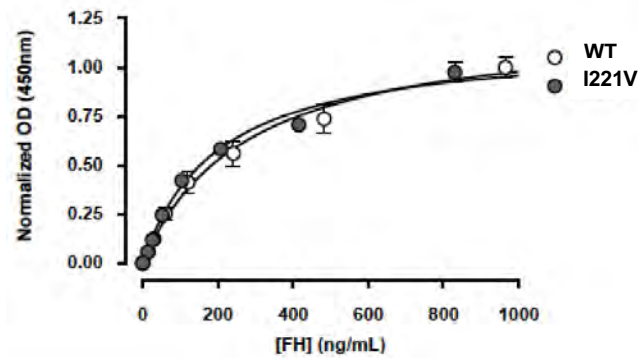

Binding to C3b

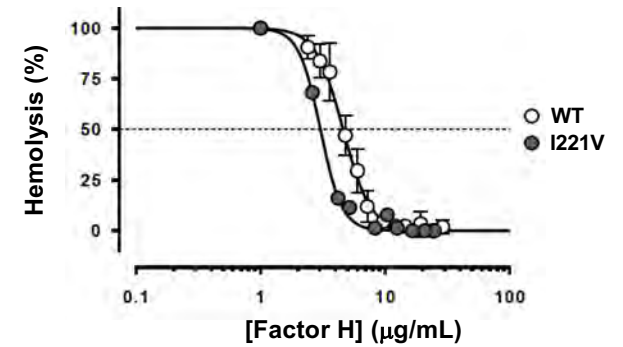

Hemolytic assay

**Conclusion: Normal Function  
BENIGN**

Previous studies: None

Comments:

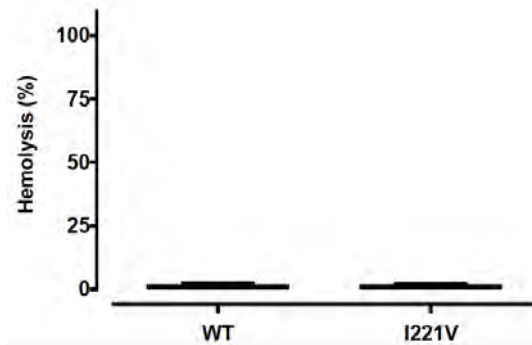

Cofactor activity

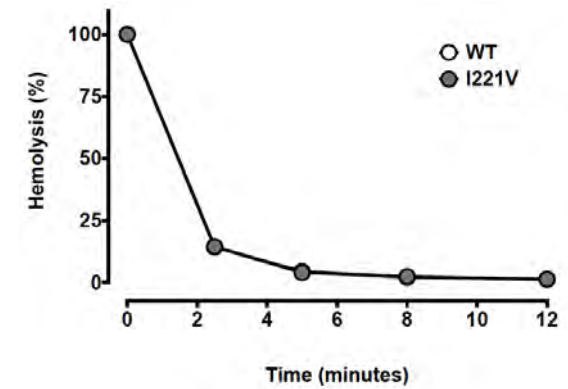

Decay-accelerating activity

# c.773C>T (P258L)

CADD: 21.1  
gnomAD:  $4 \times 10^{-6}$

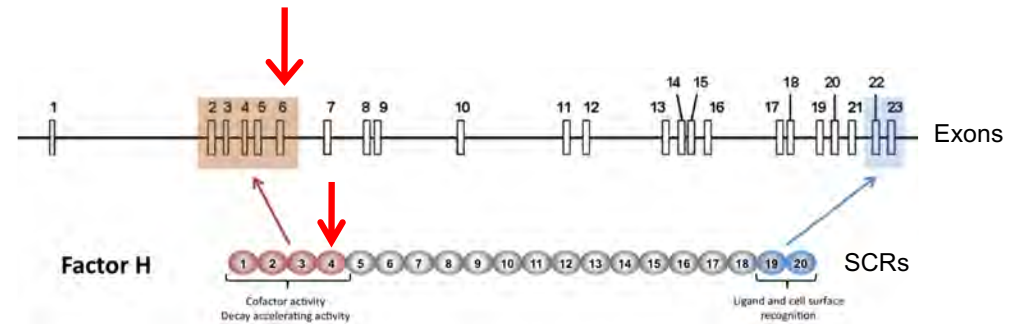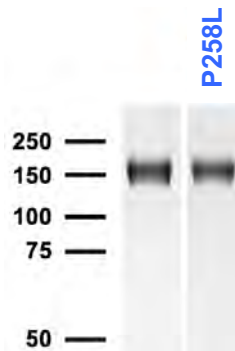

SDS-PAGE  
(Non-reduced)

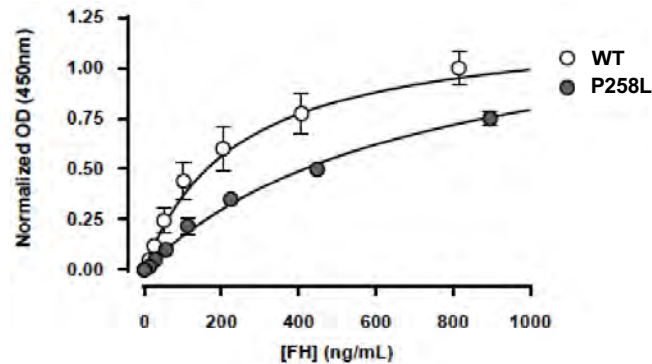

Binding to C3b

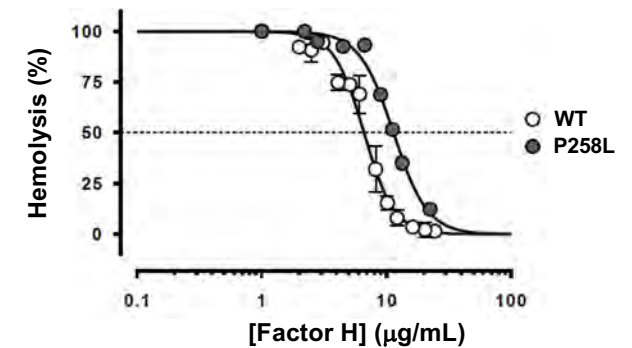

Hemolytic assay

**Conclusion: Impaired Function  
PATHOGENIC**

**Previous studies:** Pathogenic in Osborne AJ, Breno M, Borsa NG, et al. Statistical Validation of Rare Complement Variants Provides Insights into the Molecular Basis of Atypical Hemolytic Uremic Syndrome and C3 Glomerulopathy. *The Journal of Immunology*. 2018;ji1701695.

Comments:

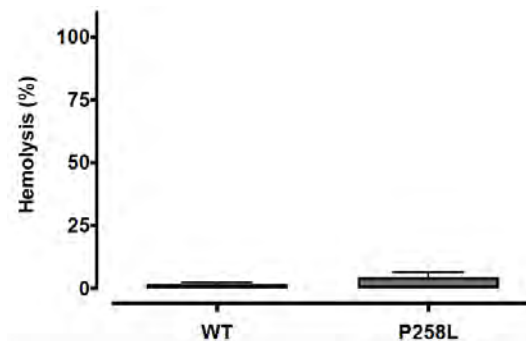

Cofactor activity

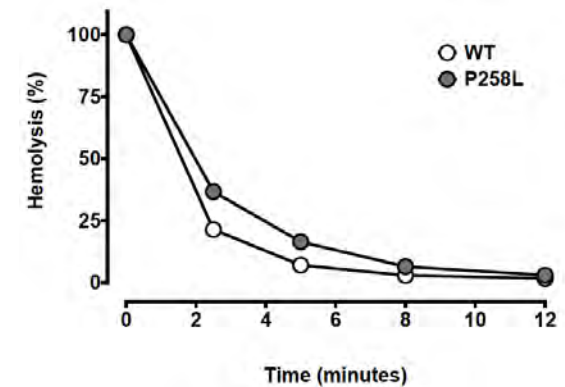

Decay-accelerating activity

# c.908G>A (R303Q)

CADD: 0.17  
gnomAD:  $2 \times 10^{-5}$

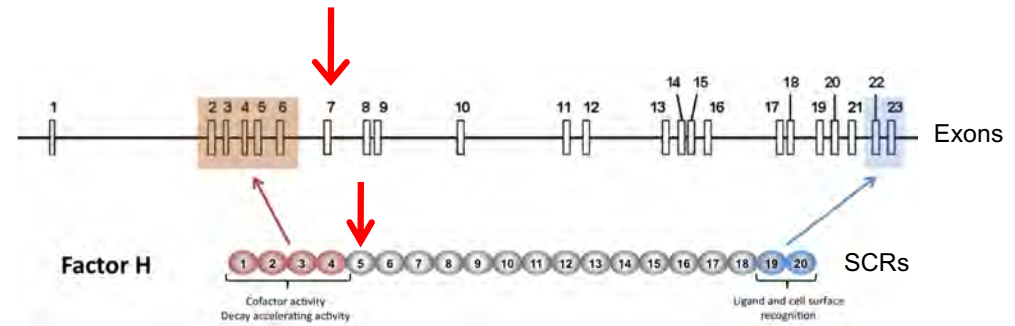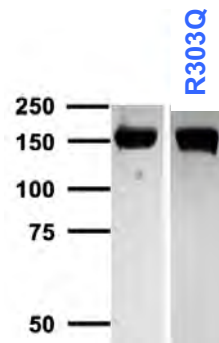

SDS-PAGE  
(Non-reduced)

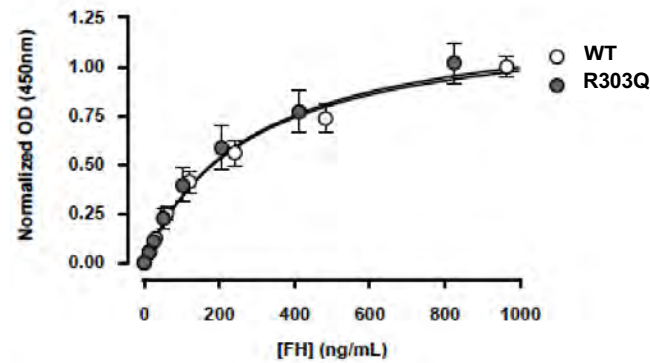

Binding to C3b

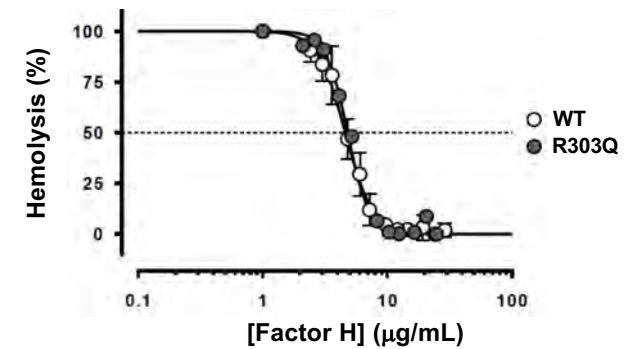

Hemolytic assay

Conclusion: Normal Function  
BENIGN

Previous studies: None

Comments:

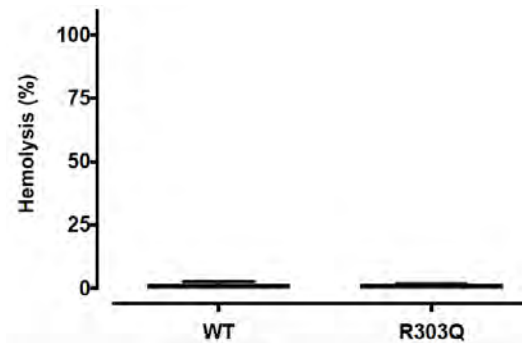

Cofactor activity

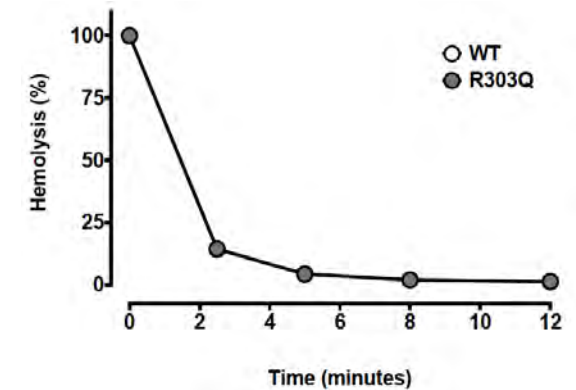

Decay-accelerating activity



# c.974G>A (C325Y)

**CADD: 25.7**  
**gnomAD: Not present**

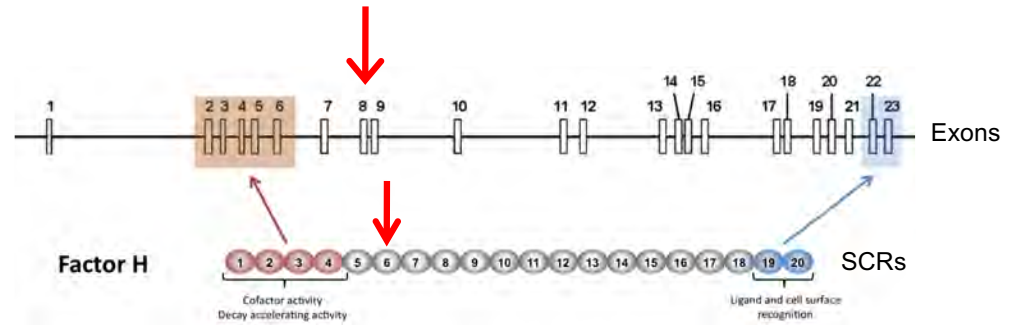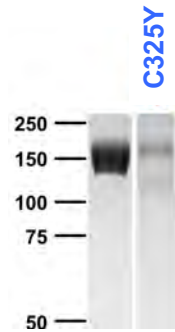

**SDS-PAGE**  
(Non-reduced)

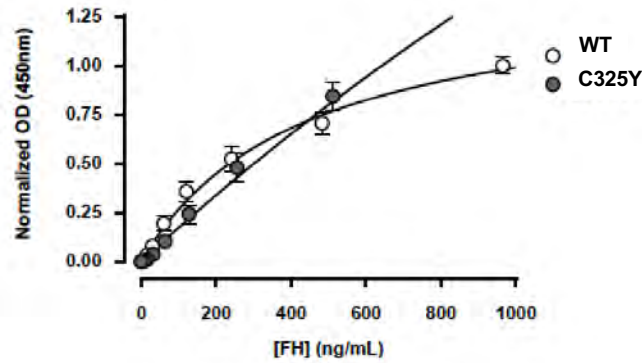

**Binding to C3b**

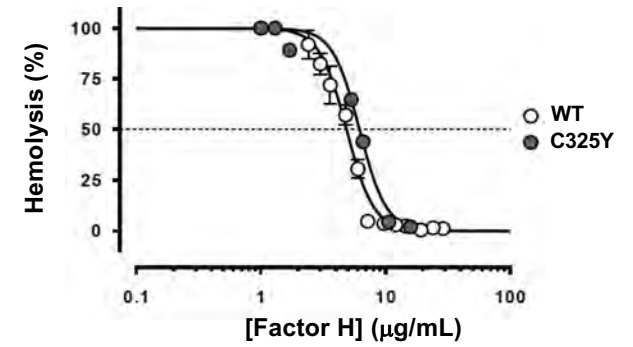

**Hemolytic assay**

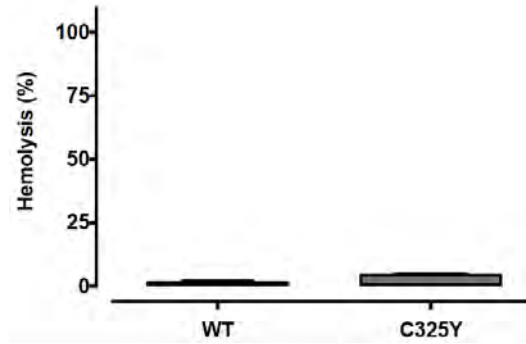

**Cofactor activity**

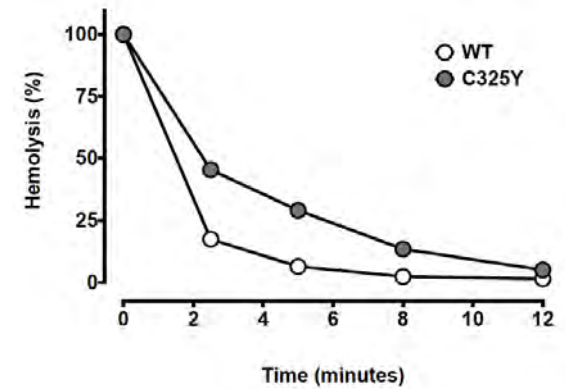

**Decay-accelerating activity**

**Conclusion: Impaired Expression**  
**PATHOGENIC**

Previous studies: None

**Comments:**

SDS-PAGE shows a weak FH band under non-reducing conditions, suggesting that this variant likely affects expression of the protein and results in a factor H deficiency

# c.1022G>A (R341H)

CADD: 7.70  
gnomAD:  $4 \times 10^{-5}$

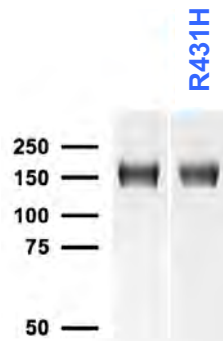

SDS-PAGE  
(Non-reduced)

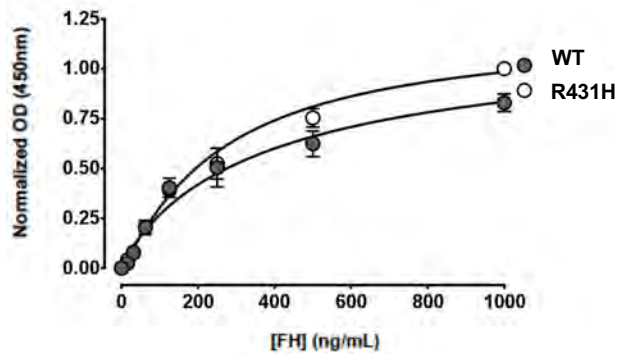

Binding to C3b

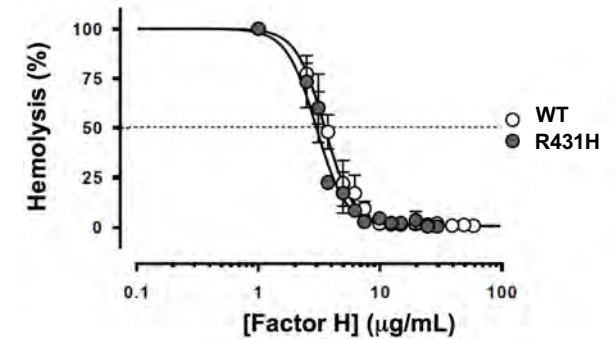

Hemolytic assay

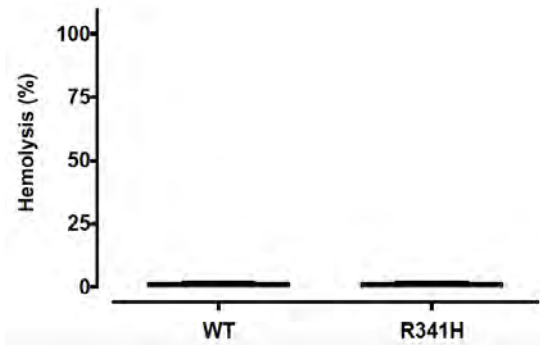

Cofactor activity

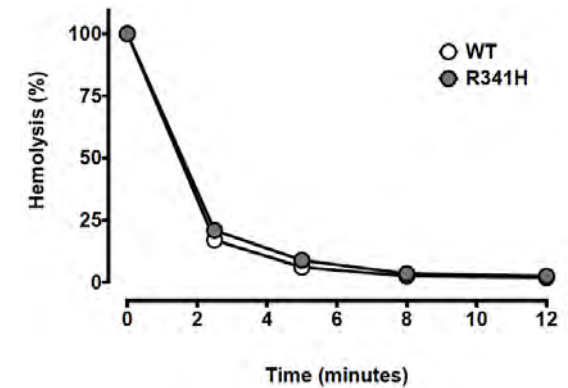

Decay-accelerating activity

Conclusion: Normal Function  
BENIGN

Previous studies: None

Comments:

# c.1064A>C (Y355S)

**CADD: 22.2**  
**gnomAD: Not present**

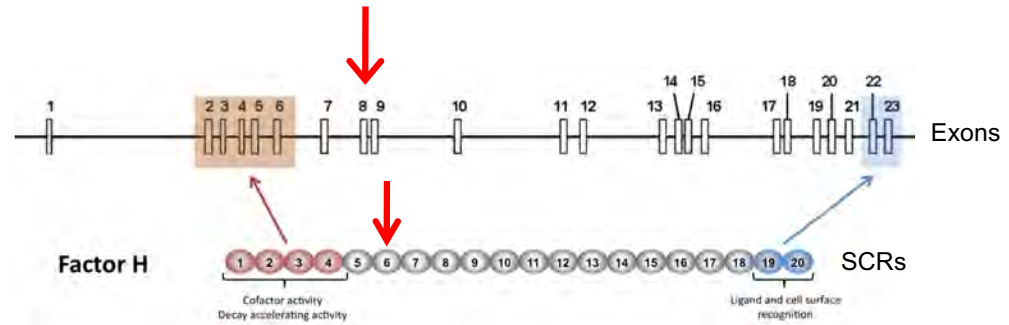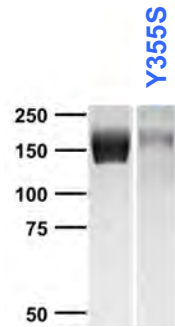

**SDS-PAGE**  
(Non-reduced)

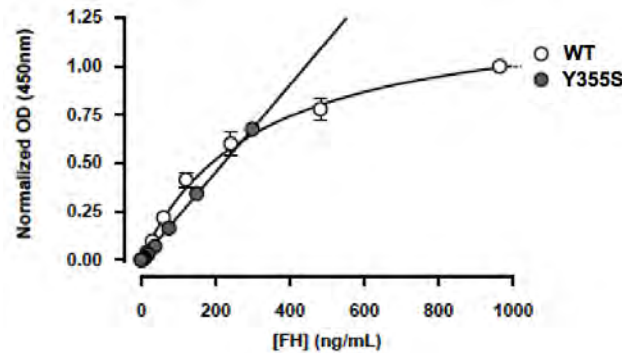

**Binding to C3b**

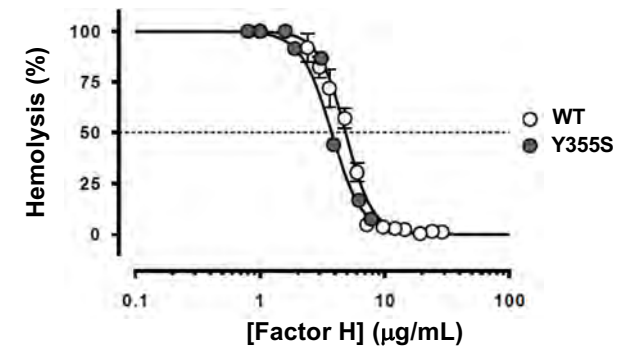

**Hemolytic assay**

**Conclusion: Impaired Expression**  
**PATHOGENIC**

Previous studies: None

**Comments:**

SDS-PAGE shows a weak FH band under non-reducing conditions, suggesting that this variant likely affects expression of the protein and results in a factor H deficiency

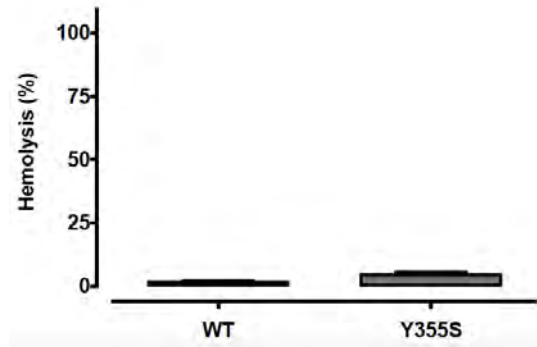

**Cofactor activity**

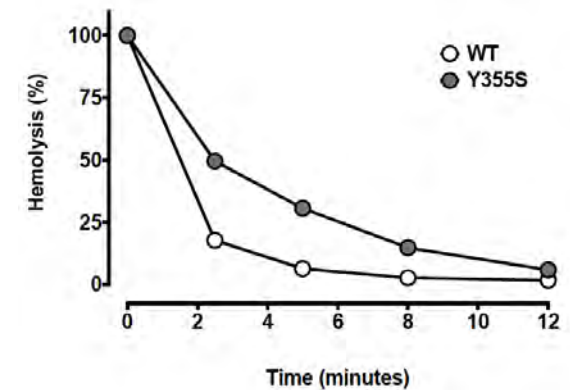

**Decay-accelerating activity**

# c.1189G>A (G397R)

**CADD: 28.8**  
**gnomAD: Not present**

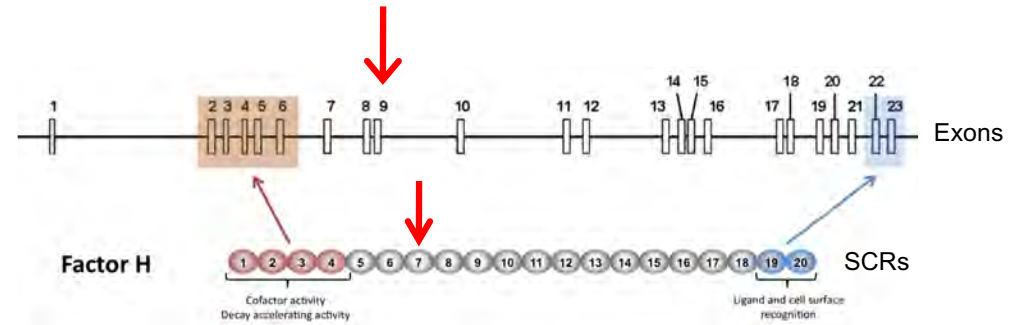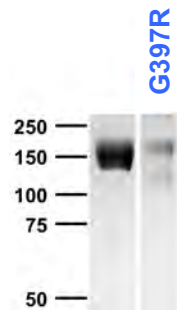

**SDS-PAGE**  
(Non-reduced)

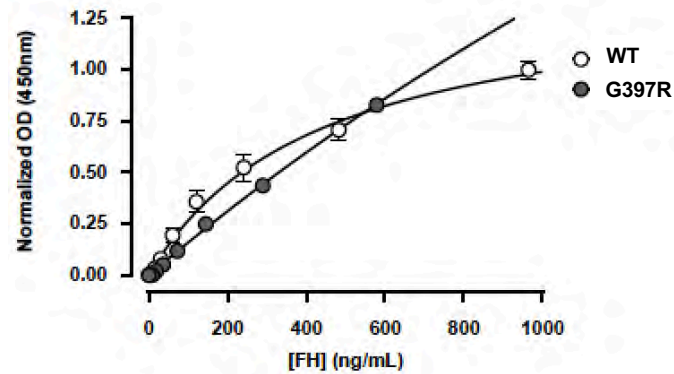

**Binding to C3b**

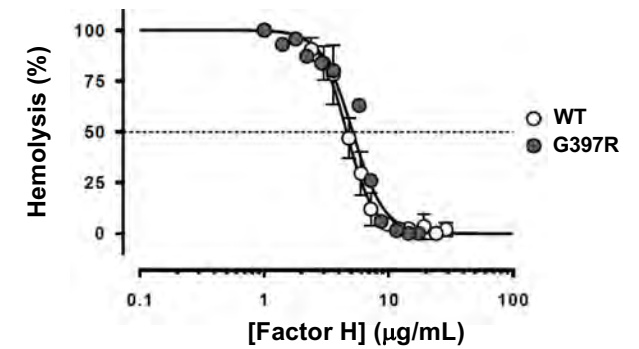

**Hemolytic assay**

**Conclusion: Impaired Expression**  
**PATHOGENIC**

**Previous studies:** Non-expressed in Fakhouri F, Roumenina L, Provot F, et al. Pregnancy-Associated Hemolytic Uremic Syndrome Revisited in the Era of Complement Gene Mutations. *Journal of the American Society of Nephrology*. 2010;21(5):859-867.

**Comments:**

SDS-PAGE shows a weak FH band under non-reducing conditions, suggesting that this variant likely affects expression of the protein and results in a factor H deficiency

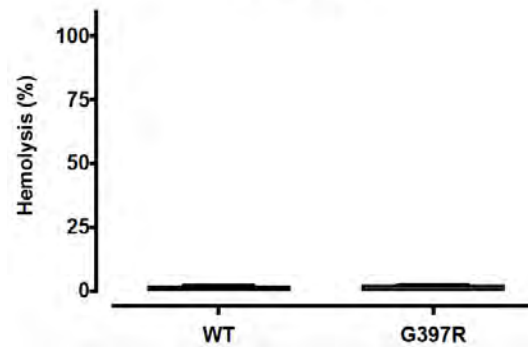

**Cofactor activity**

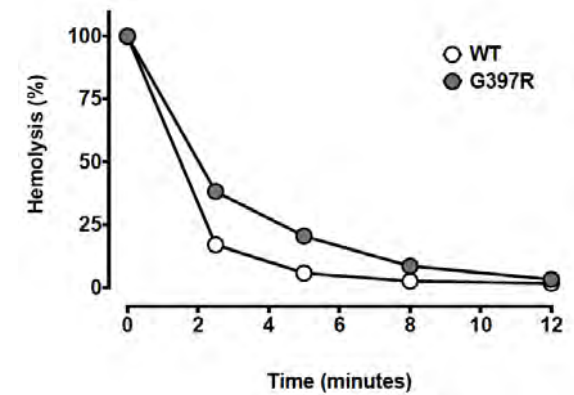

**Decay-accelerating activity**

# c.1198C>A (Q400K)

CADD: 0  
gnomAD:  $1 \times 10^{-4}$

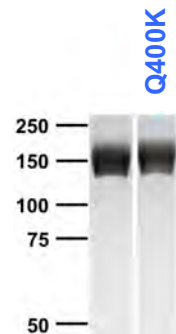

SDS-PAGE  
(Non-reduced)

**Conclusion:** Normal Function  
**BENIGN**

Previous studies: None

#### Comments:

Reported non-expressed by Dragon-Durey et al. J Am Soc Nephrol. 2004. Discussed in the manuscript.

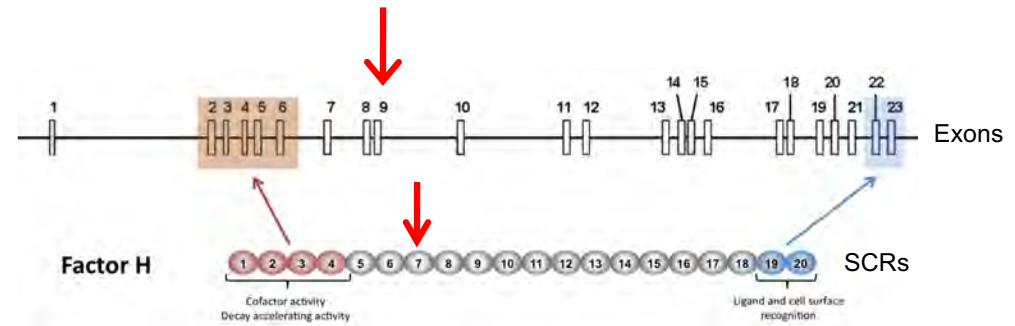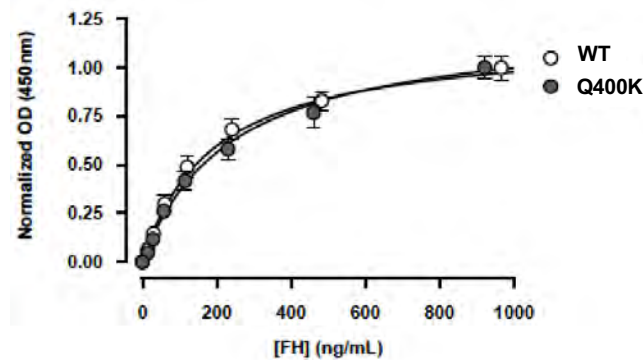

Binding to C3b

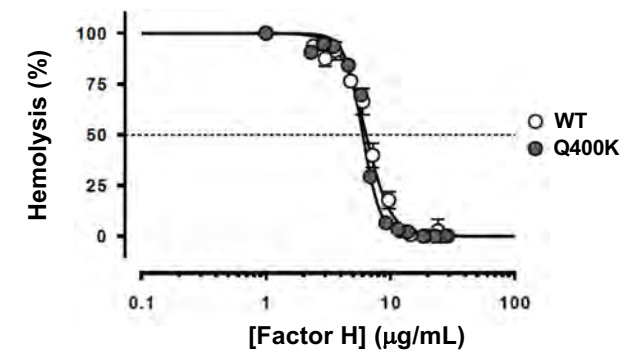

Hemolytic assay

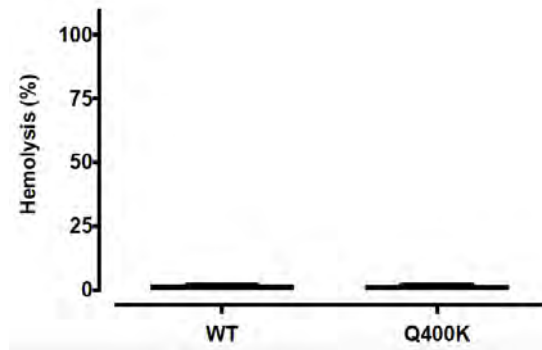

Cofactor activity

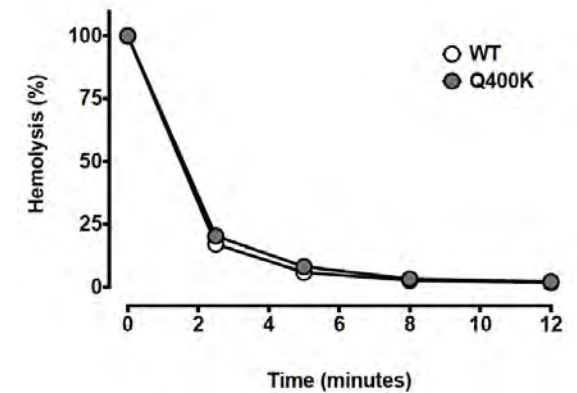

Decay-accelerating activity

# c.1204C>A (H402Y)

CADD: 0  
gnomAD:  $7 \times 10^{-1}$

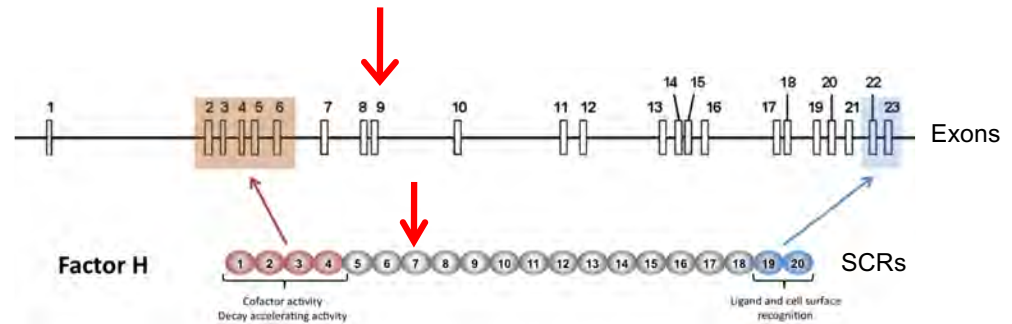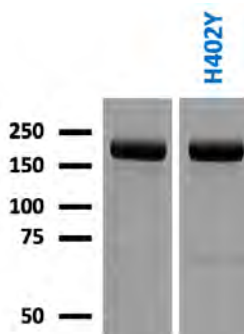

SDS-PAGE  
(Non-reduced)

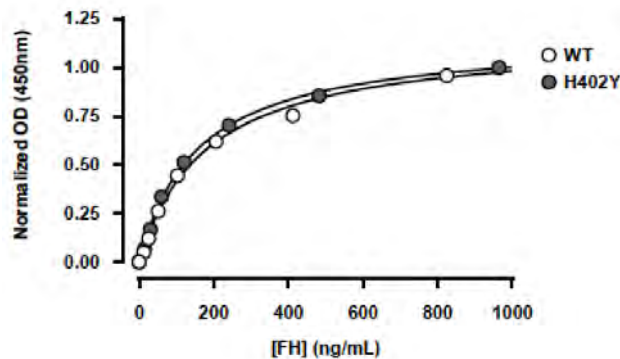

Binding to C3b

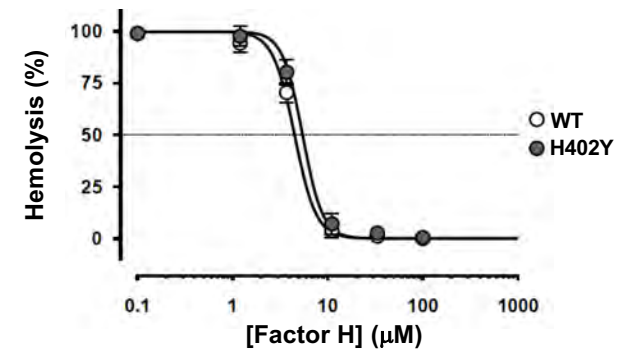

Hemolytic assay

**Conclusion: Normal Function  
BENIGN**

Previous studies:

Comments:

Common polymorphism that does not affect function

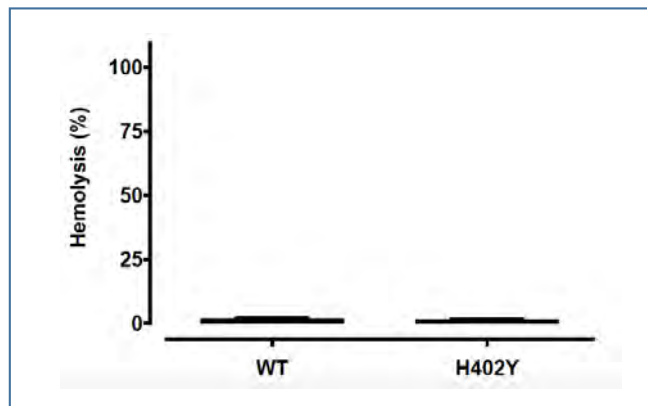

Cofactor activity

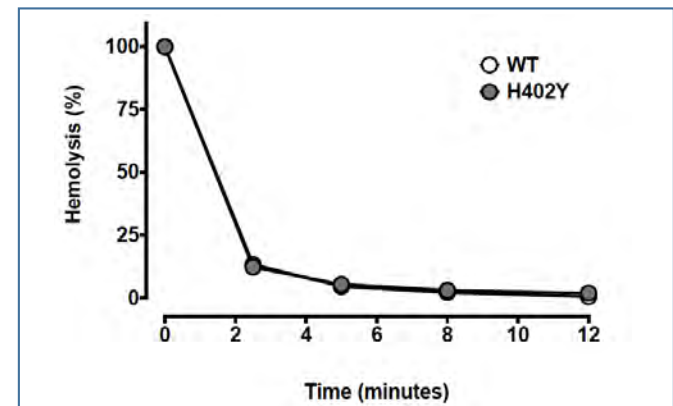

Decay-accelerating activity

# c.1231T>A (S411T)

**CADD: 0.15**  
**gnomAD: Not present**

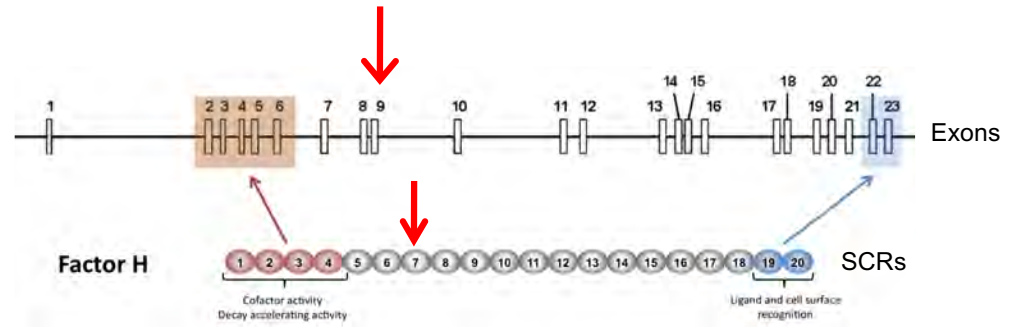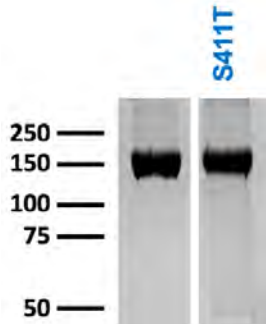

**SDS-PAGE**  
**(Non-reduced)**

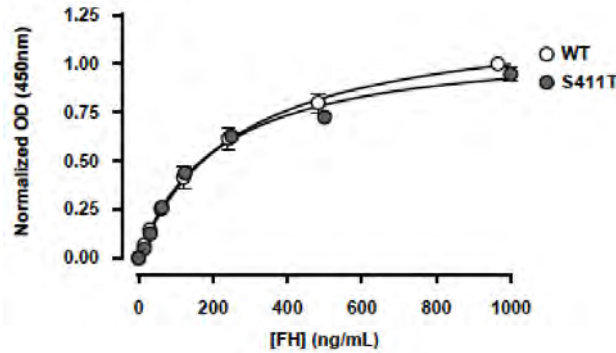

**Binding to C3b**

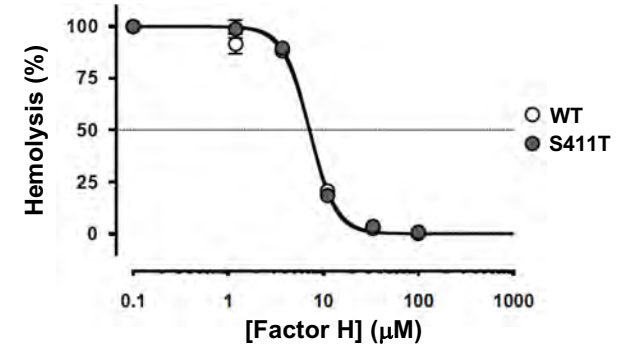

**Hemolytic assay**

**Conclusion: Normal Function**  
**BENIGN**

**Previous studies:** Benign in Goicoechea de Jorge E, Tortajada A, García SP, et al. Factor H Competitor Generated by Gene Conversion Events Associates with Atypical Hemolytic Uremic Syndrome. *Journal of the American Society of Nephrology*. 2018;29(1):240-249.

**Comments:**

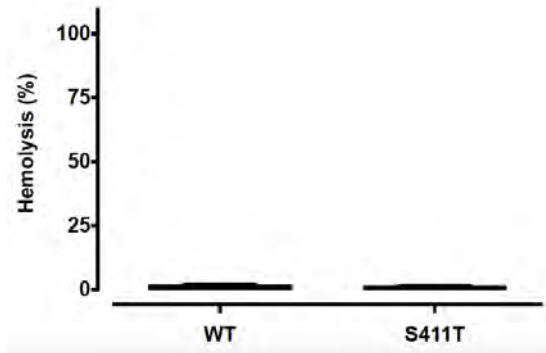

**Cofactor activity**

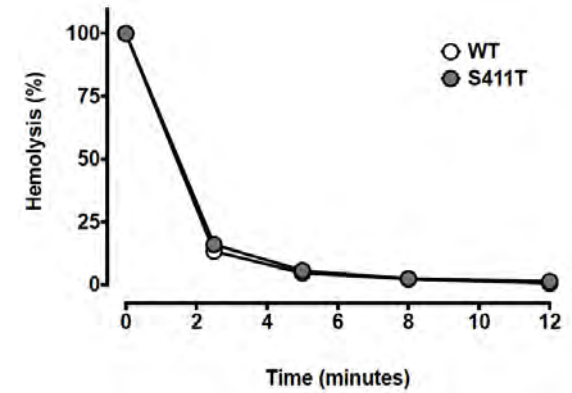

**Decay-accelerating activity**

# c.1292G>A (C431Y)

**CADD: 24.3**  
**gnomAD: Not present**

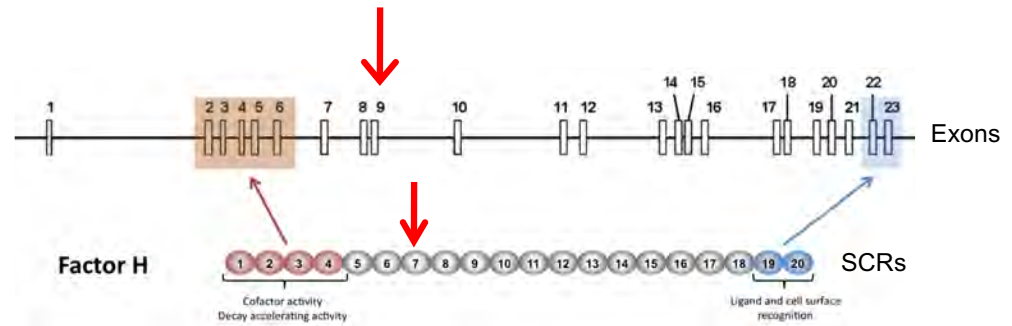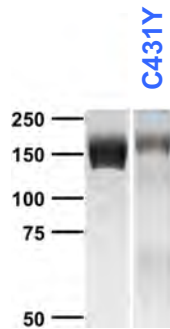

**SDS-PAGE**  
(Non-reduced)

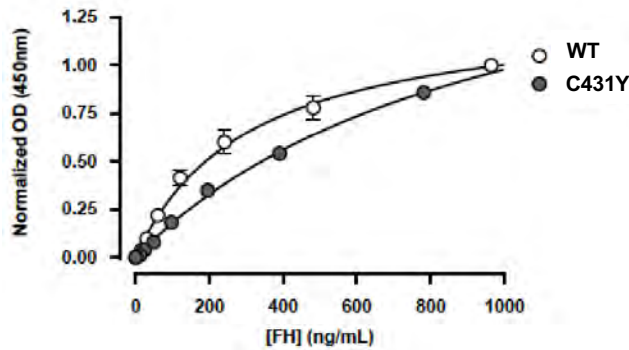

**Binding to C3b**

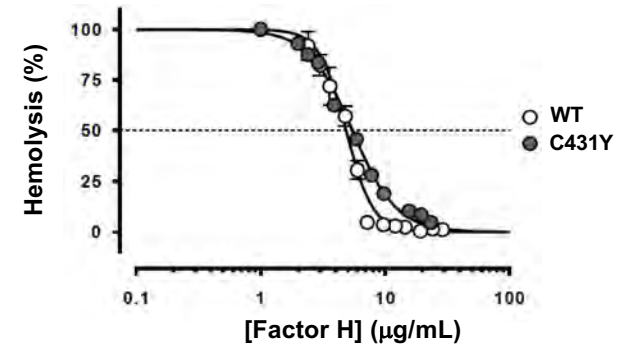

**Hemolytic assay**

**Conclusion: Impaired Expression**  
**PATHOGENIC**

**Previous studies:** Non-expressed in Montes T, Goicoechea de Jorge E, Ramos R, et al. Genetic deficiency of complement factor H in a patient with age-related macular degeneration and membranoproliferative glomerulonephritis. *Molecular Immunology*. 2008;45(10):2897-2904.

**Comments:** SDS-PAGE shows a weak FH band under non-reducing conditions, suggesting that this variant likely affects expression of the protein and results in a factor H deficiency.

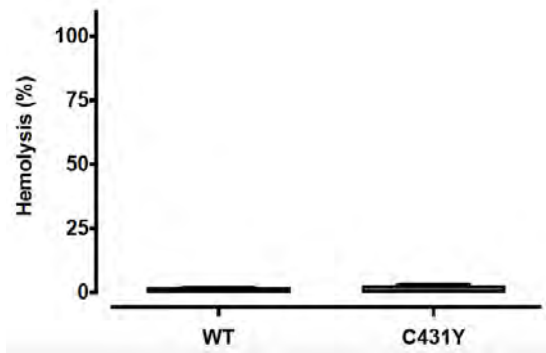

**Cofactor activity**

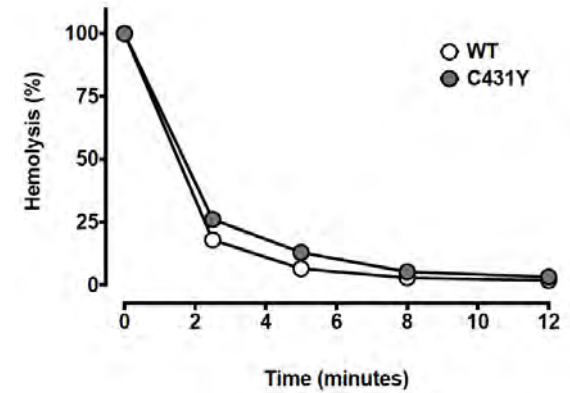

**Decay-accelerating activity**



# c.1343G>A (C448Y)

**CADD: 23**  
**gnomAD: Not present**

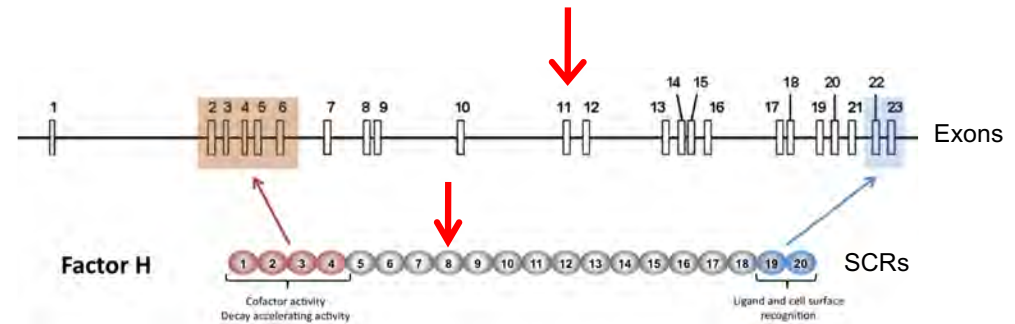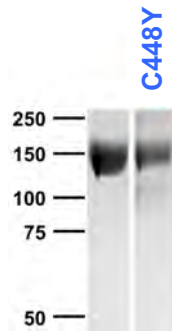

**SDS-PAGE**  
**(Non-reduced)**

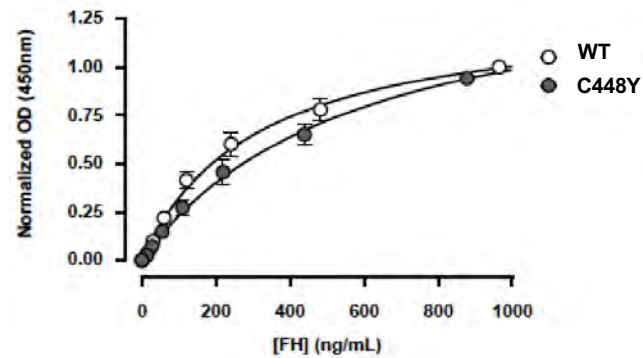

**Binding to C3b**

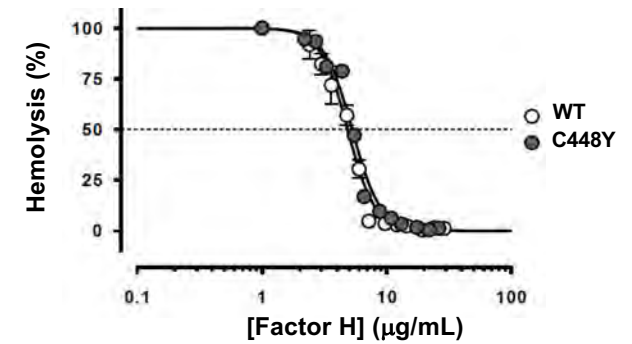

**Hemolytic assay**

**Conclusion: Impaired Expression**  
**PATHOGENIC**

**Previous studies:** Non-expressed in Szarvas N, Szilágyi Á, Csuka D, et al. Genetic analysis and functional characterization of novel mutations in a series of patients with atypical hemolytic uremic syndrome. *Mol Immunol.* 2016;71:10-22.

**Comments:**

SDS-PAGE shows a weak FH band under non-reducing conditions, suggesting that this variant likely affects expression of the protein and results in a factor H deficiency.

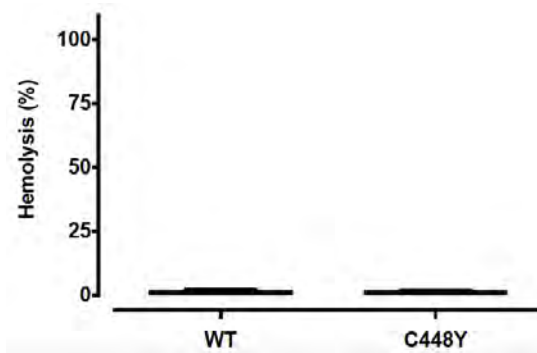

**Cofactor activity**

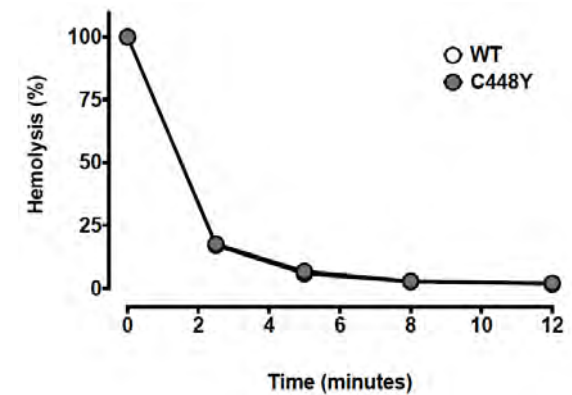

**Decay-accelerating activity**

# c.1424A>C (Y475S)

**CADD: 20.3**  
**gnomAD: Not present**

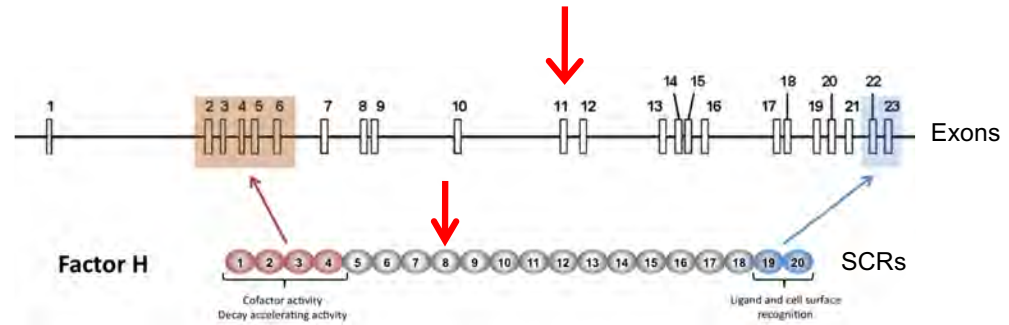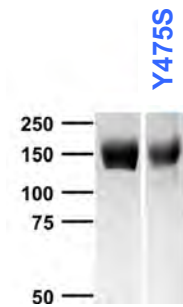

**SDS-PAGE**  
(Non-reduced)

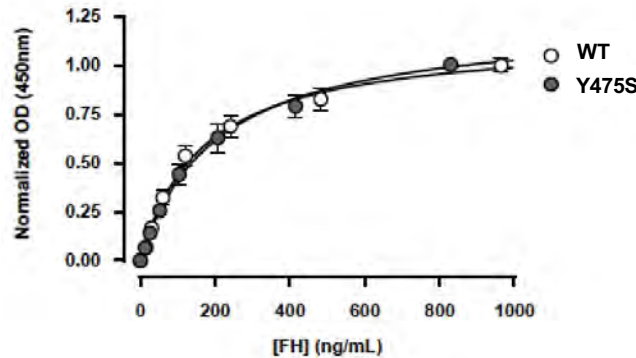

**Binding to C3b**

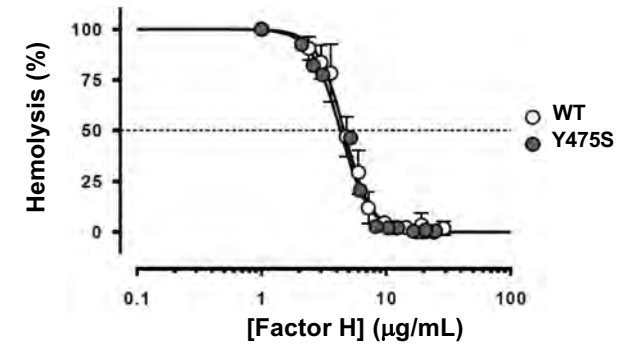

**Hemolytic assay**

**Conclusion: Impaired Expression**  
**PATHOGENIC**

**Previous studies:** Pathogenic in Nürnberger J, Philipp T, Witzke O, et al. Eculizumab for Atypical Hemolytic-Uremic Syndrome. *New England Journal of Medicine*. 2009;360(5):542-544.

**Comments:**

SDS-PAGE shows a FH band with diminished intensity under non-reducing conditions, suggesting that this variant likely affects expression of the protein and results in a factor H deficiency.

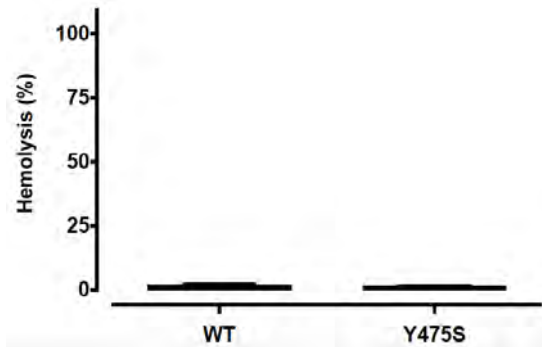

**Cofactor activity**

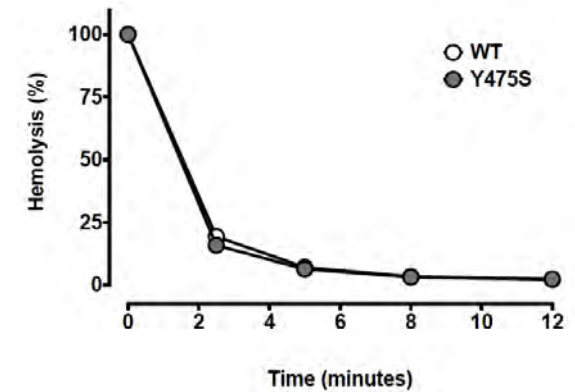

**Decay-accelerating activity**

# c.1507C>G (P503A)

CADD: 21.9  
gnomAD:  $2 \times 10^{-5}$

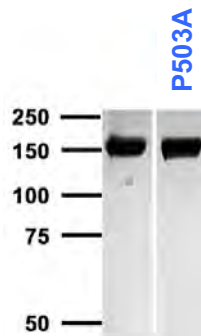

SDS-PAGE  
(Non-reduced)

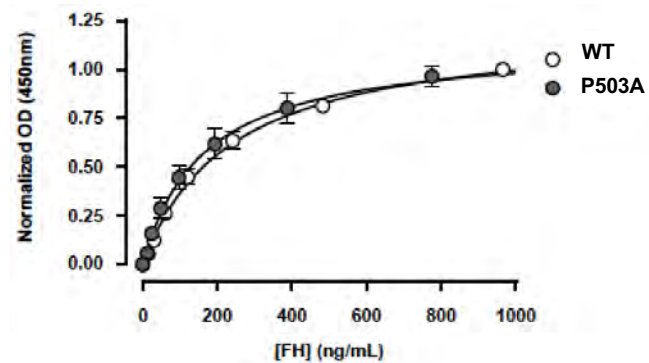

Binding to C3b

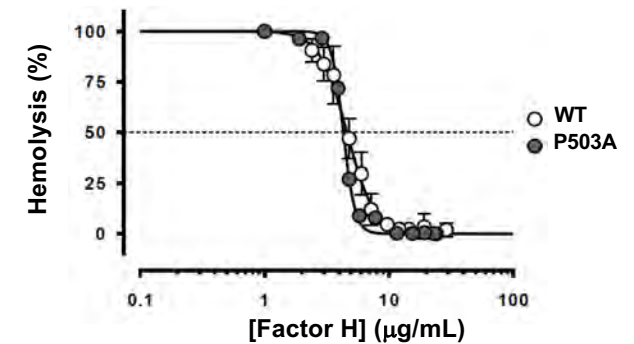

Hemolytic assay

Conclusion: Normal Function  
**BENIGN**

Previous studies: None

Comments:

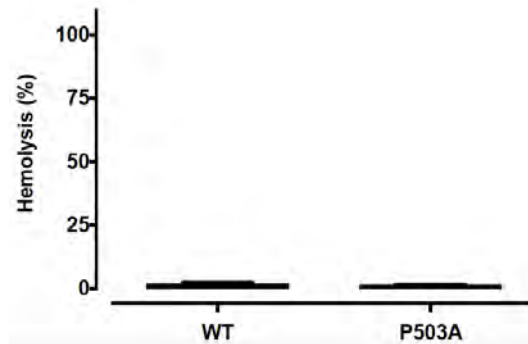

Cofactor activity

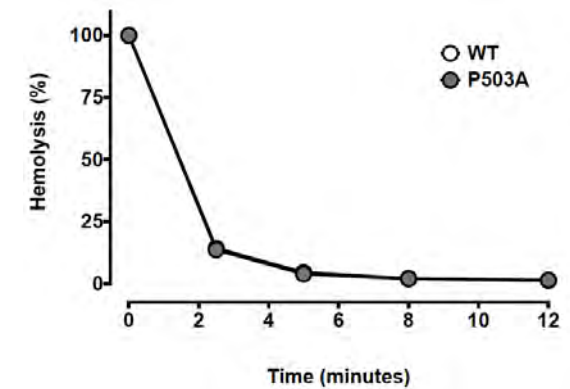

Decay-accelerating activity

# c.1548T>A (N516K)

CADD: 21.7  
gnomAD:  $3 \times 10^{-4}$

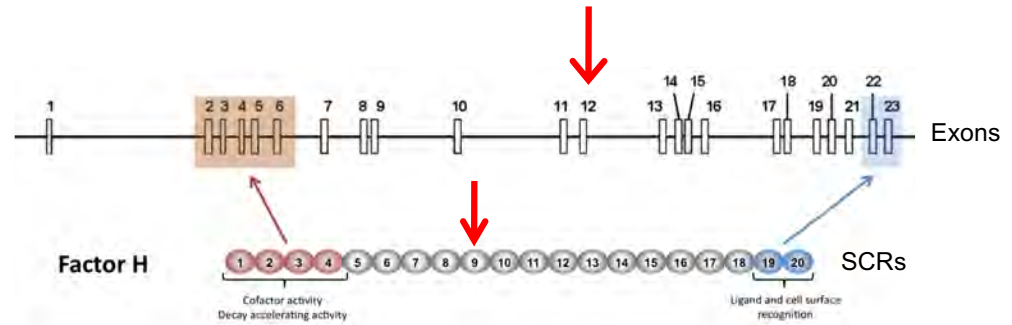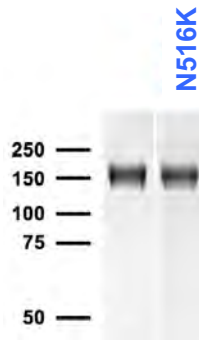

SDS-PAGE  
(Non-reduced)

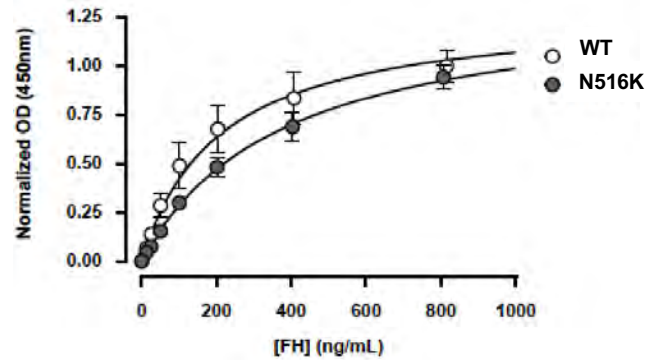

Binding to C3b

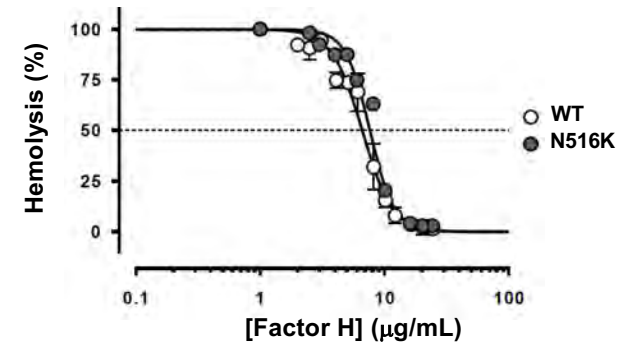

Hemolytic assay

Conclusion: Normal Function  
**BENIGN**

Previous studies: None

Comments:

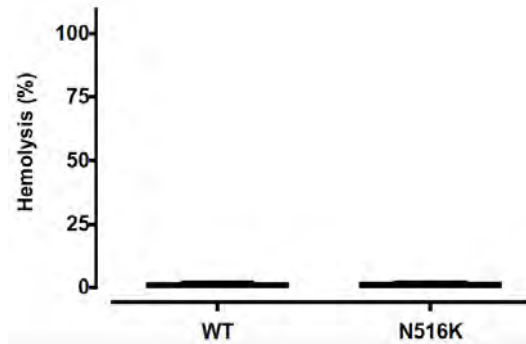

Cofactor activity

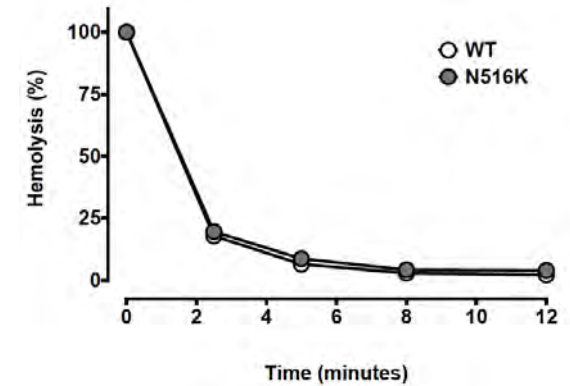

Decay-accelerating activity

# c.1565A>G (D522G)

CADD: 13.1  
gnomAD: Not present

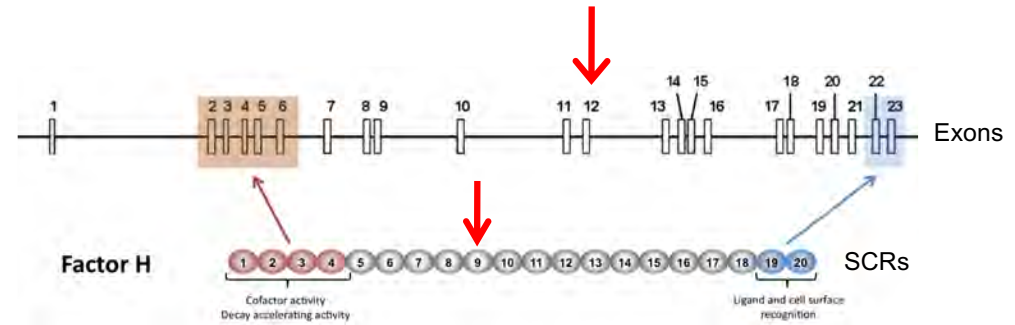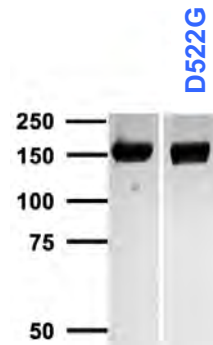

SDS-PAGE  
(Non-reduced)

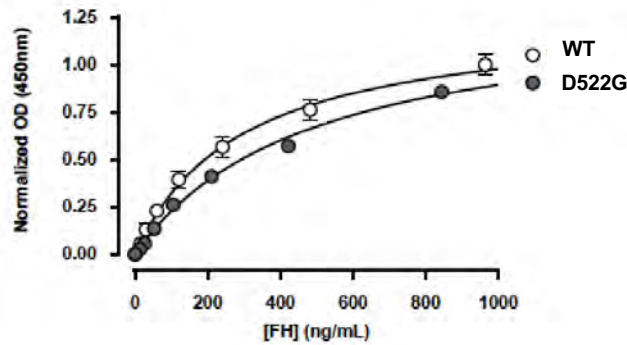

Binding to C3b

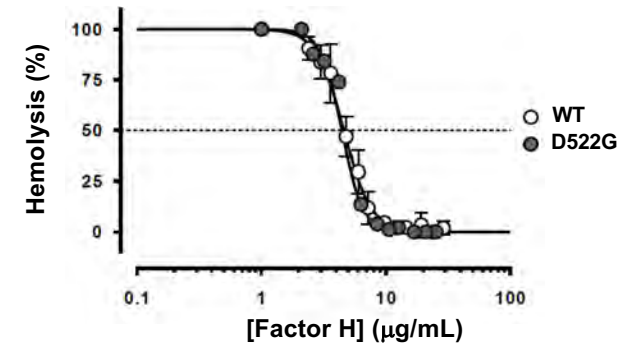

Hemolytic assay

Conclusion: Normal Function  
BENIGN

Previous studies: None

Comments:

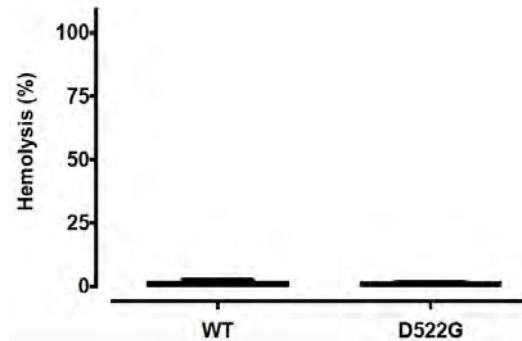

Cofactor activity

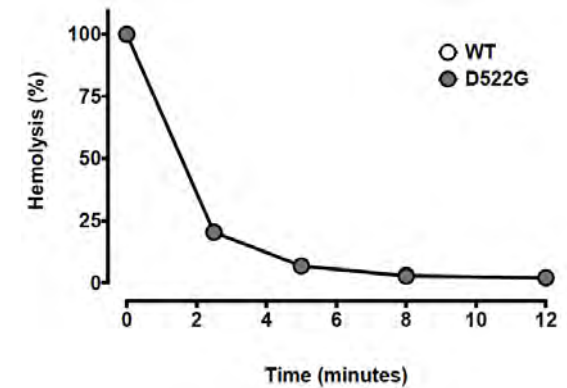

Decay-accelerating activity

# c.1591A>G (T531A)

CADD: 0  
gnomAD:  $8 \times 10^{-6}$

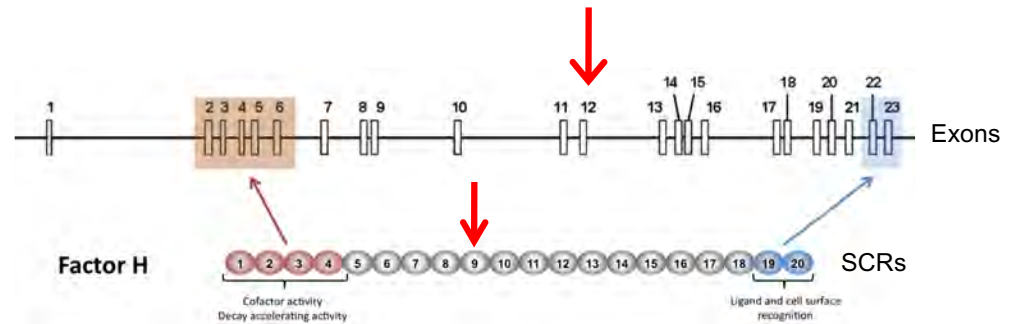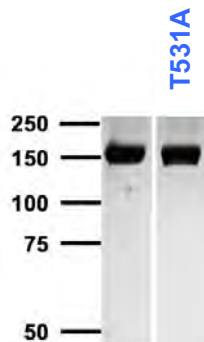

SDS-PAGE  
(Non-reduced)

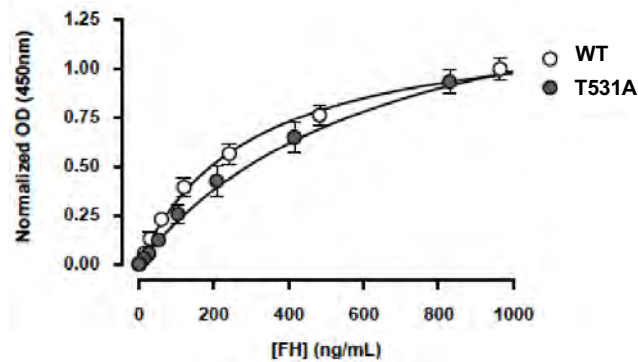

Binding to C3b

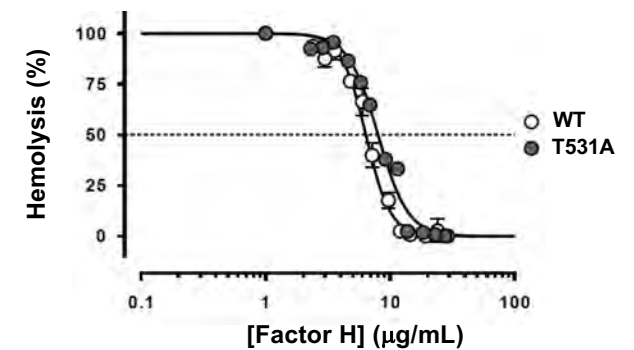

Hemolytic assay

Conclusion: Normal Function  
BENIGN

Previous studies: None

Comments:

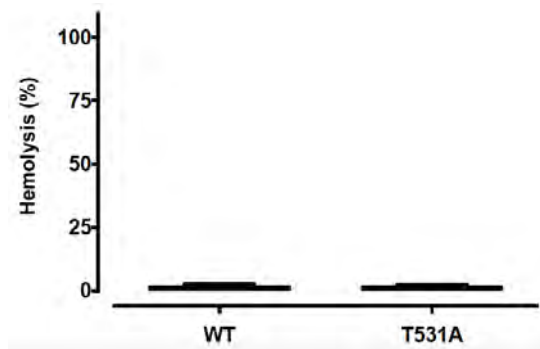

Cofactor activity

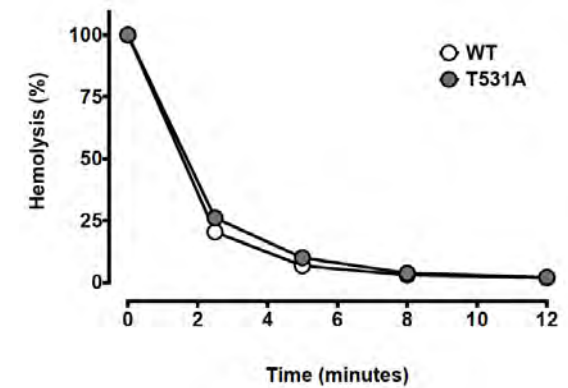

Decay-accelerating activity

# c.1652T>C (I551T)

**CADD: 21.4**  
**gnomAD:  $5 \times 10^{-3}$**

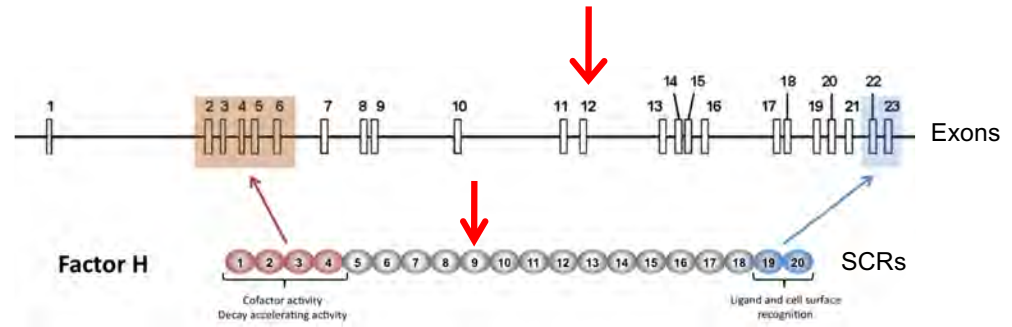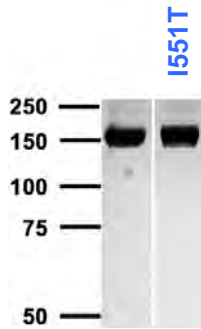

SDS-PAGE  
(Non-reduced)

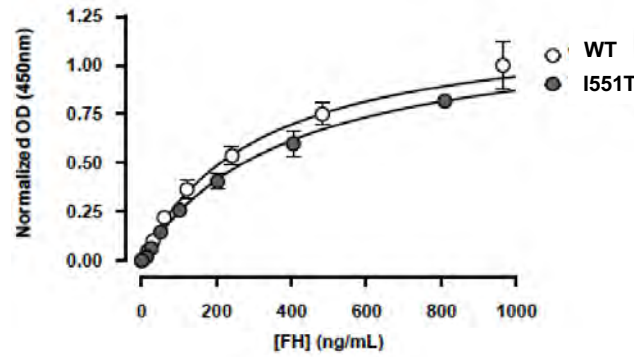

Binding to C3b

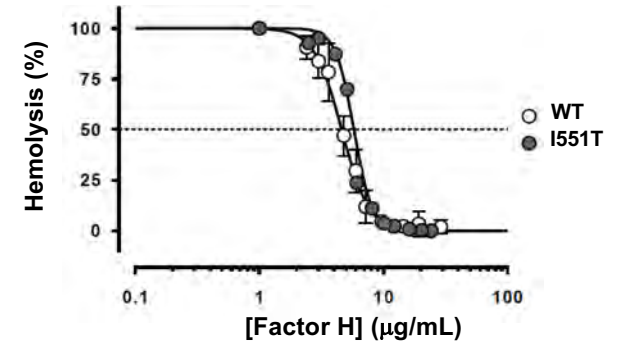

Hemolytic assay

**Conclusion: Normal Function**  
**BENIGN**

Previous studies: None

Comments:

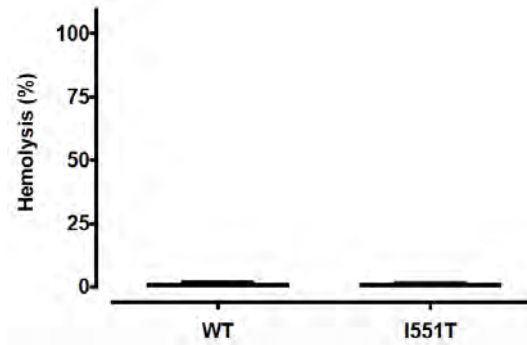

Cofactor activity

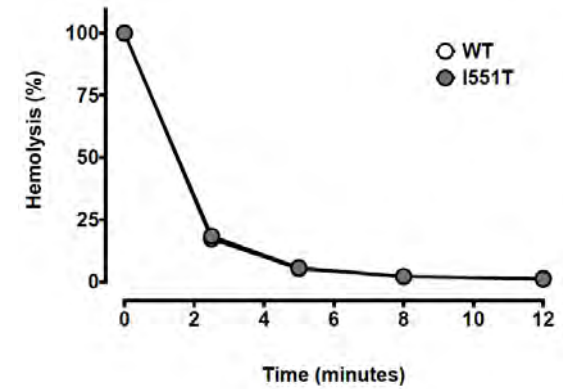

Decay-accelerating activity

# c.1745G>A (R582H)

CADD: 17.7  
gnomAD:  $2 \times 10^{-5}$

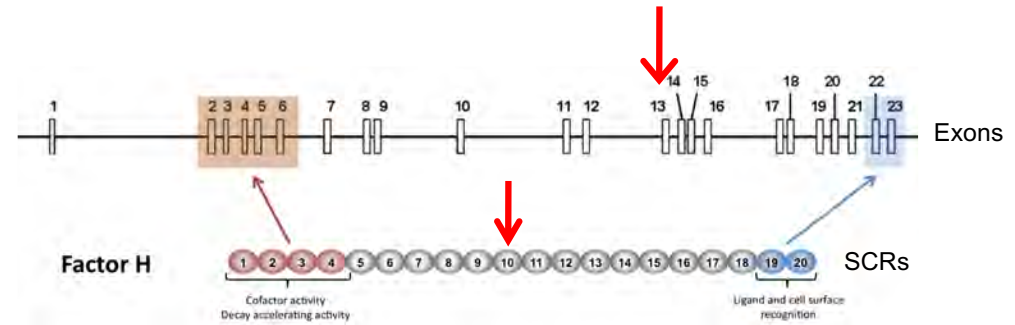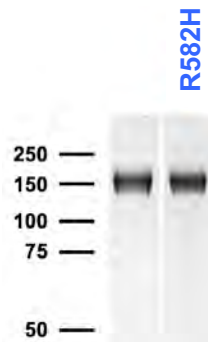

SDS-PAGE  
(Non-reduced)

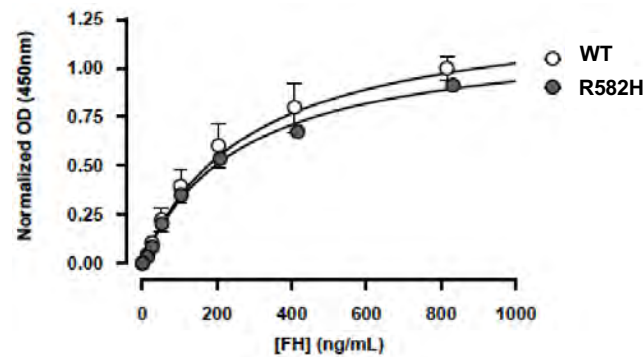

Binding to C3b

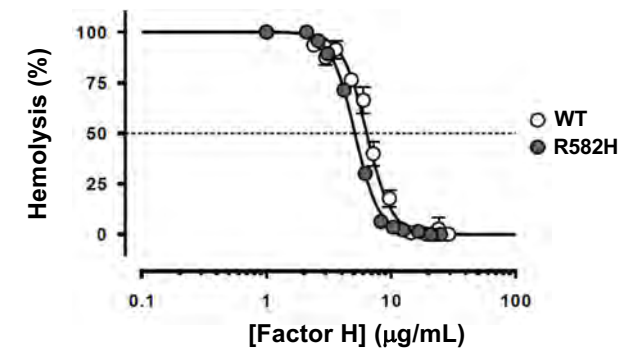

Hemolytic assay

Conclusion: Normal Function  
BENIGN

Previous studies: None

Comments:

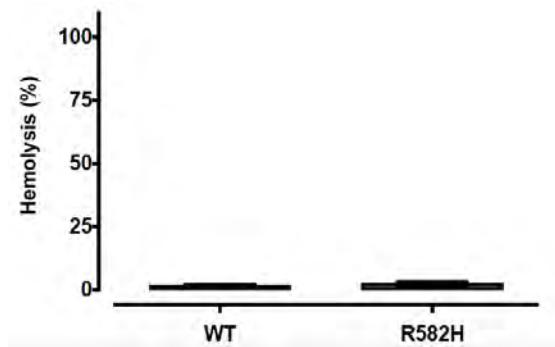

Cofactor activity

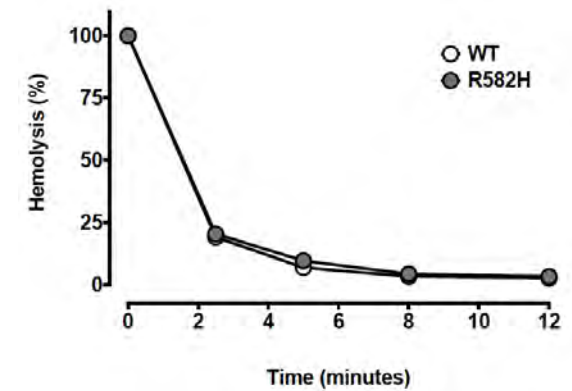

Decay-accelerating activity



# c.1825G>A (V609I)

CADD: 0.77  
gnomAD:  $2 \times 10^{-4}$

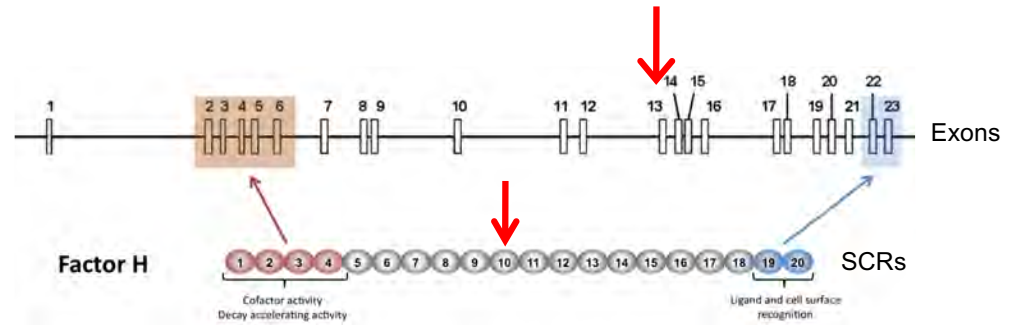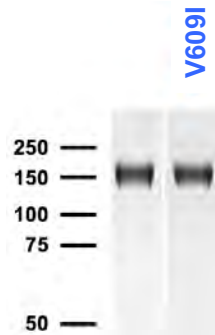

SDS-PAGE  
(Non-reduced)

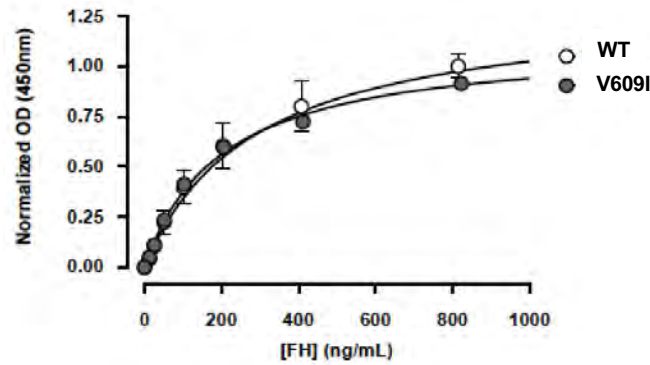

Binding to C3b

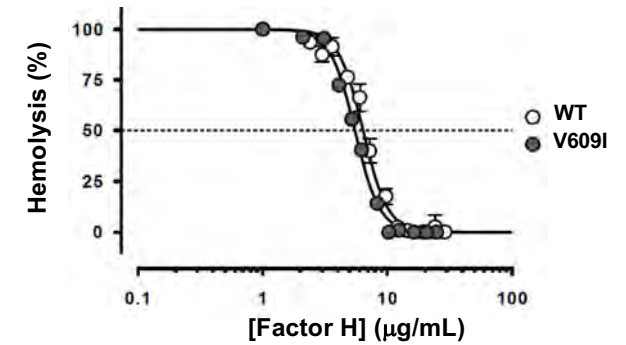

Hemolytic assay

Conclusion: Normal Function  
BENIGN

Previous studies: None

Comments:

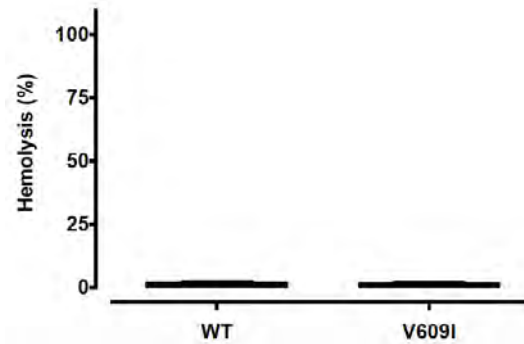

Cofactor activity

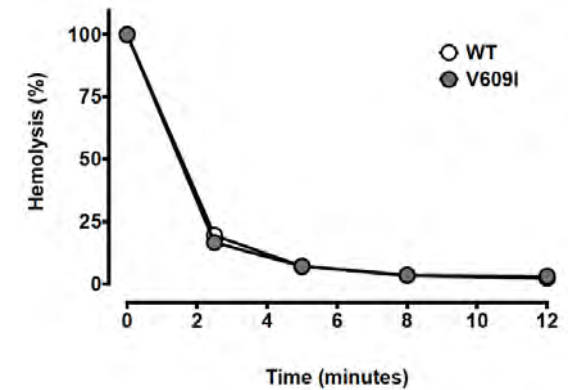

Decay-accelerating activity

# c.1922T>C (V641A)

CADD: 13.51  
gnomAD:  $5 \times 10^{-5}$

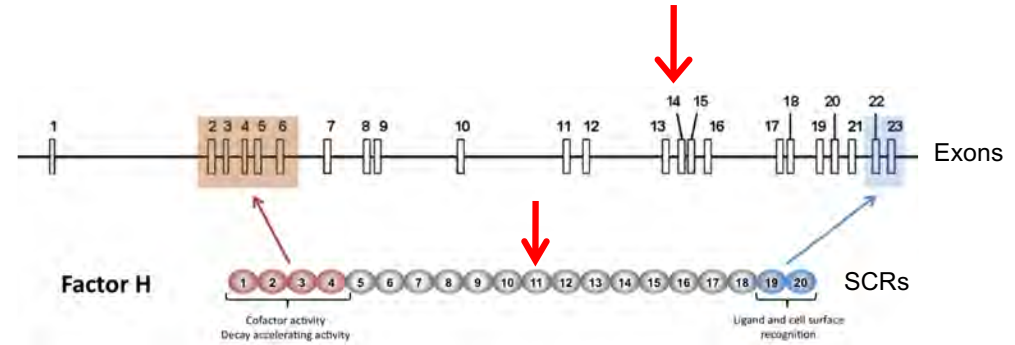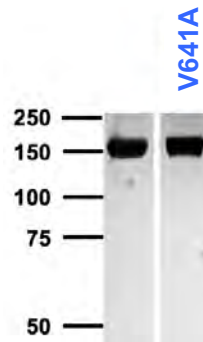

SDS-PAGE  
(Non-reduced)

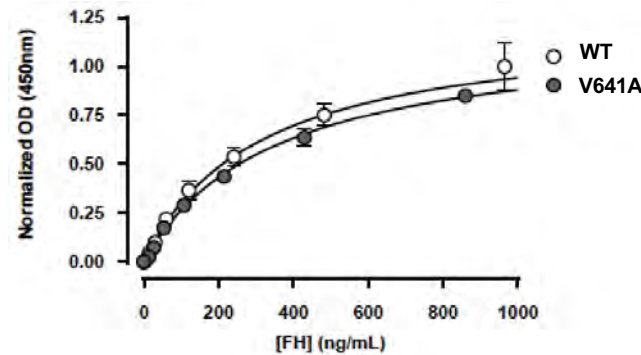

Binding to C3b

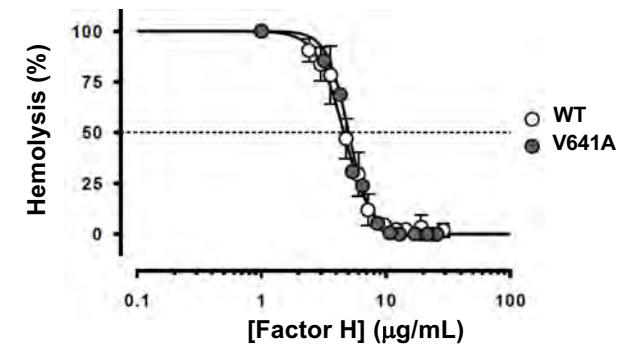

Hemolytic assay

Conclusion: Normal Function  
BENIGN

Previous studies: None

Comments:

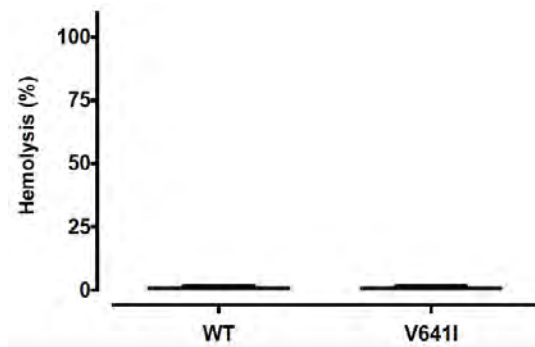

Cofactor activity

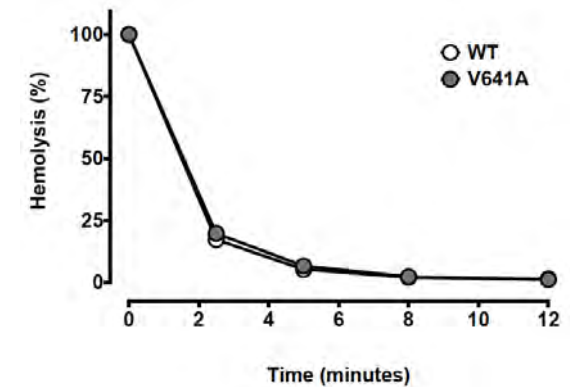

Decay-accelerating activity

# c.1949G>T (G650V)

CADD: 0.18  
gnomAD:  $2 \times 10^{-4}$

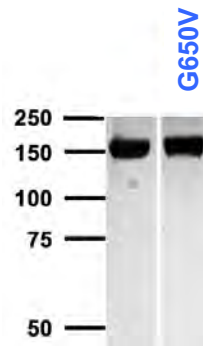

SDS-PAGE  
(Non-reduced)

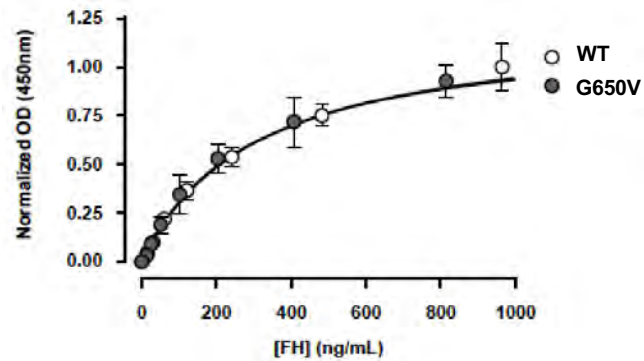

Binding to C3b

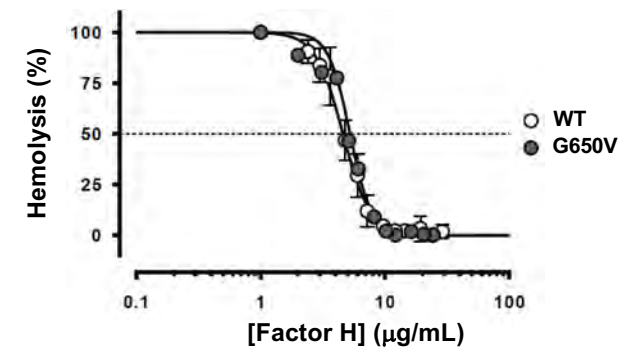

Hemolytic assay

Conclusion: Normal Function  
**BENIGN**

Previous studies: None

Comments:

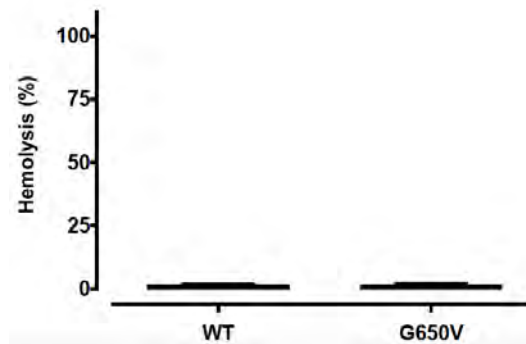

Cofactor activity

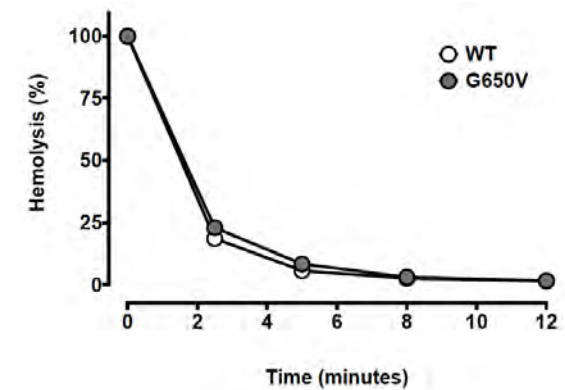

Decay-accelerating activity

# c.2056G>A (V686M)

CADD: 34  
gnomAD: Not present

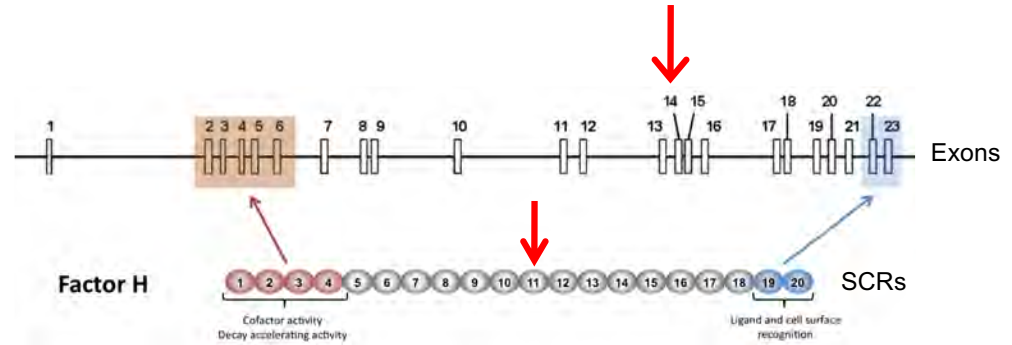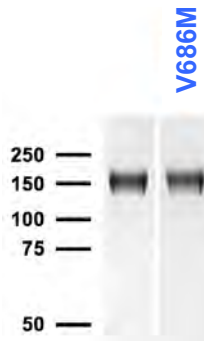

SDS-PAGE  
(Non-reduced)

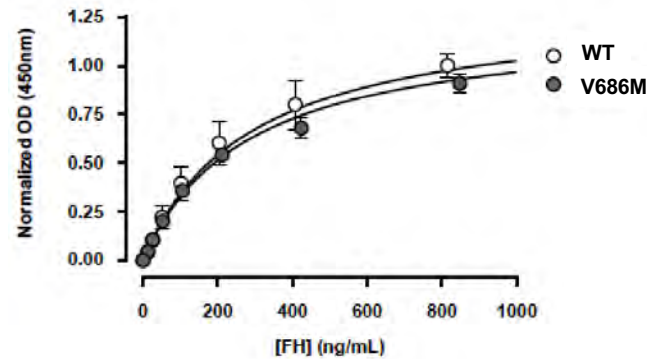

Binding to C3b

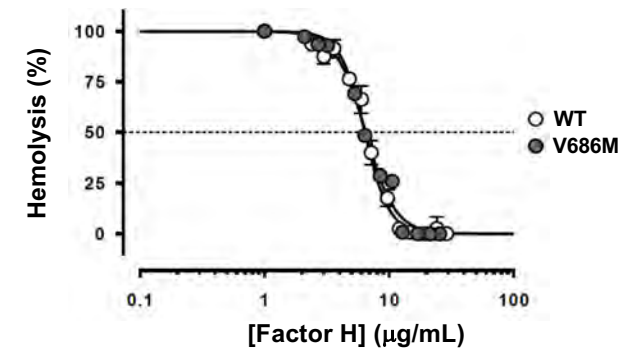

Hemolytic assay

Conclusion: Normal Function  
BENIGN

Previous studies: None

Comments:

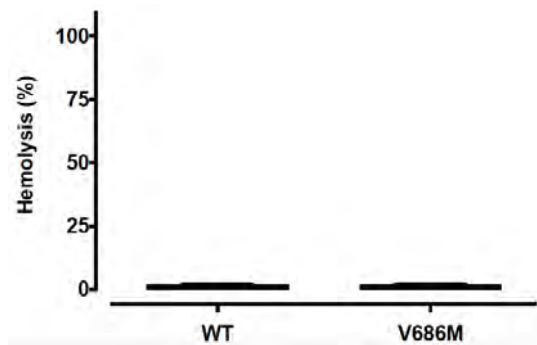

Cofactor activity

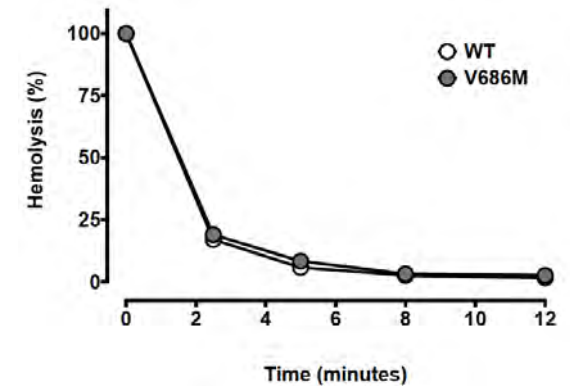

Decay-accelerating activity

# c.2120C>T (P707L)

**CADD: 25.1**  
**gnomAD: Not present**

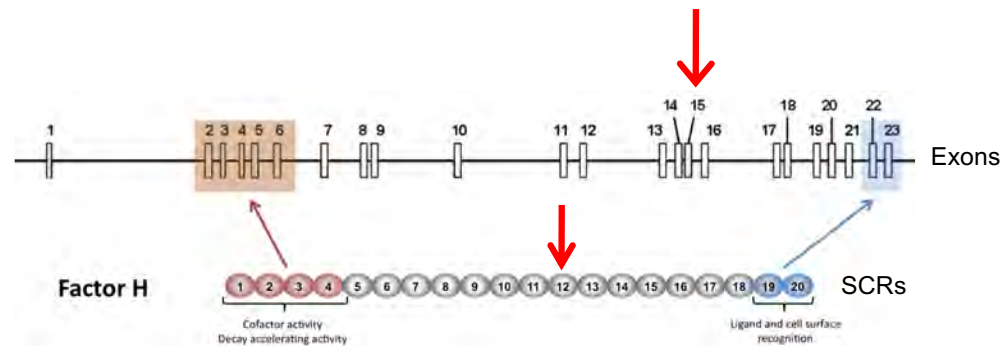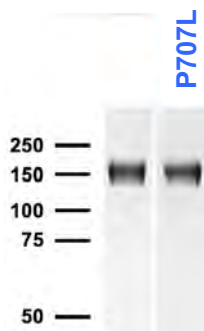

SDS-PAGE  
(Non-reduced)

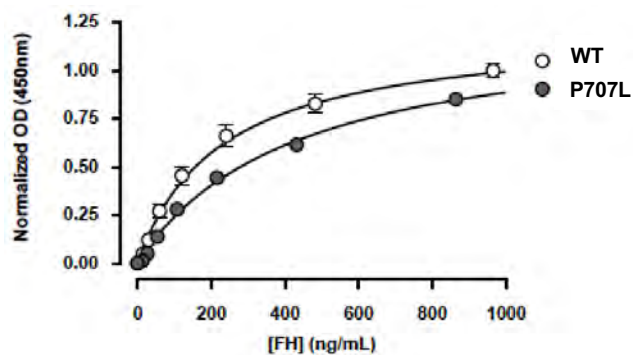

Binding to C3b

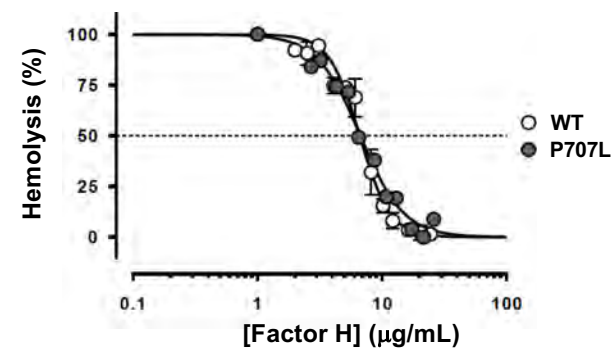

Hemolytic assay

**Conclusion: Normal Function**  
**BENIGN**

Previous studies: None

Comments:

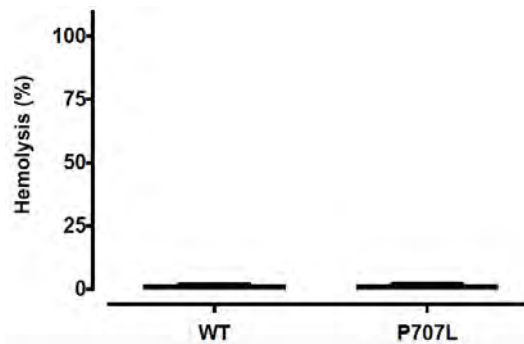

Cofactor activity

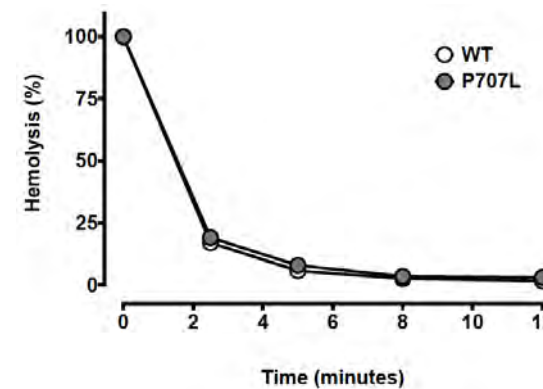

Decay-accelerating activity

# c.2461C>T (H821Y)

CADD: 0.11  
gnomAD:  $9 \times 10^{-5}$

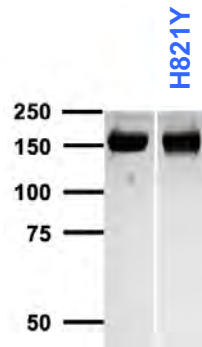

SDS-PAGE  
(Non-reduced)

Conclusion: Normal Function  
BENIGN

Previous studies: None

Comments:

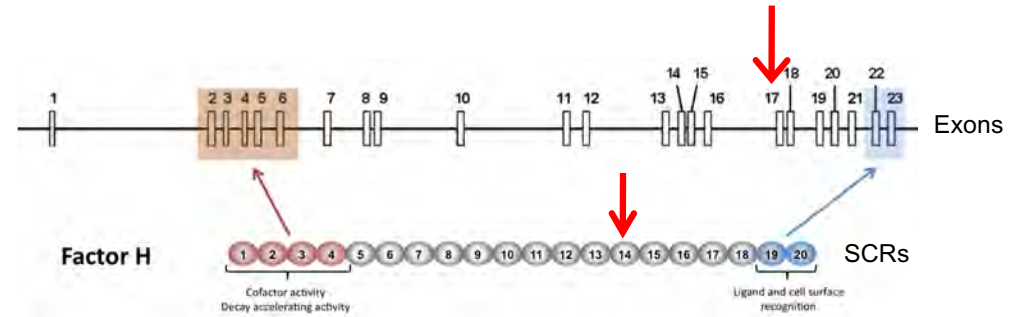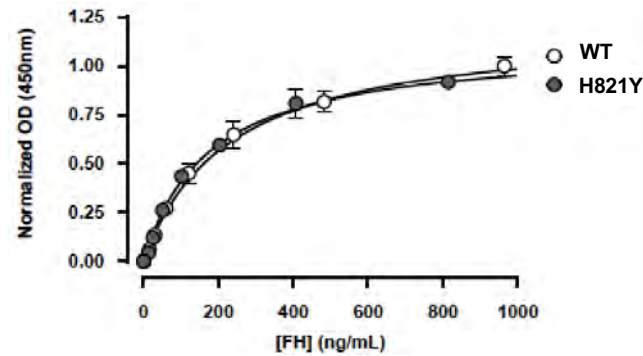

Binding to C3b

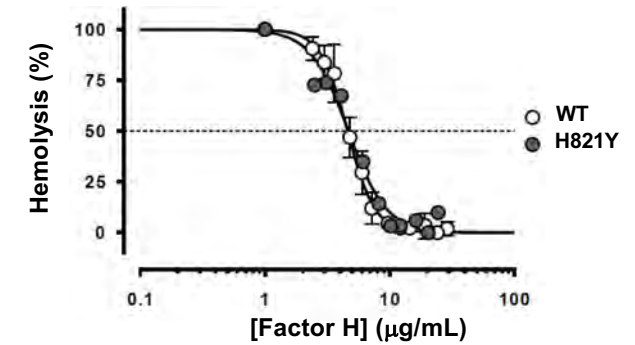

Hemolytic assay

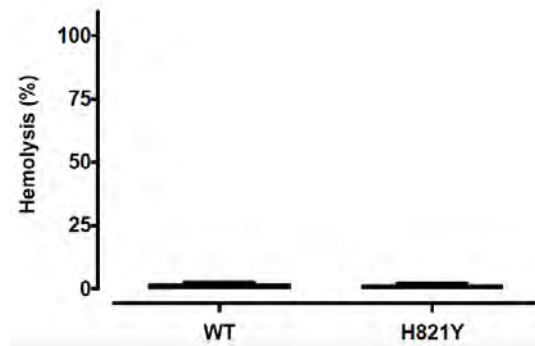

Cofactor activity

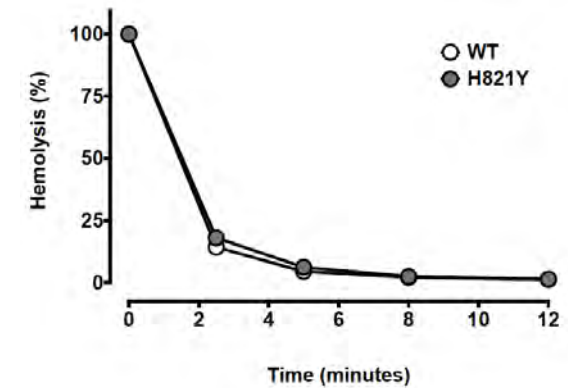

Decay-accelerating activity

# c.2503G>T (V835L)

CADD: 0.46  
gnomAD:  $1 \times 10^{-5}$

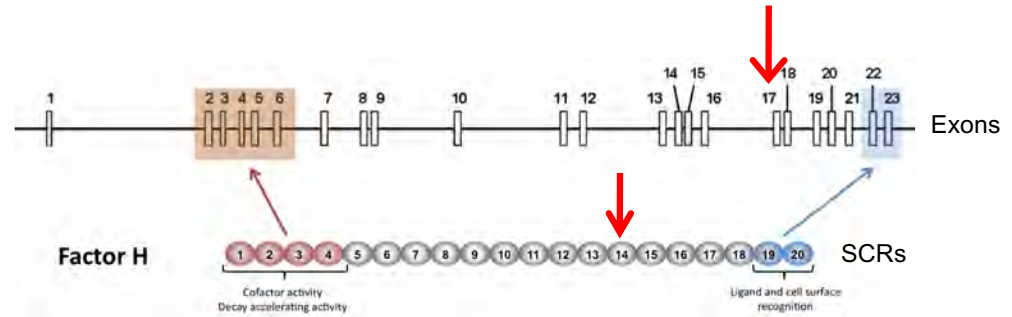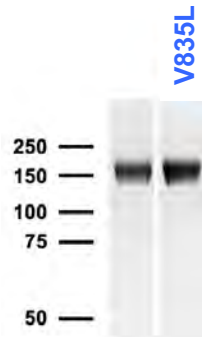

SDS-PAGE  
(Non-reduced)

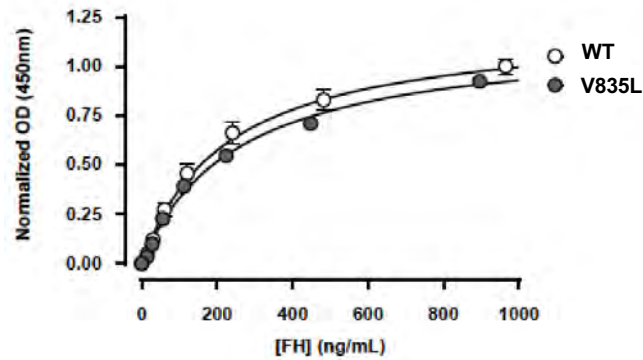

Binding to C3b

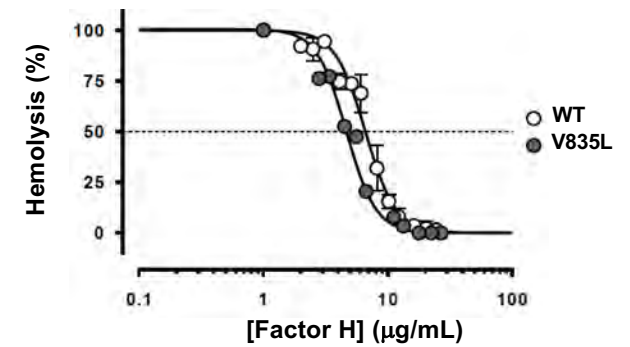

Hemolytic assay

Conclusion: Normal Function  
BENIGN

Previous studies: None

Comments:

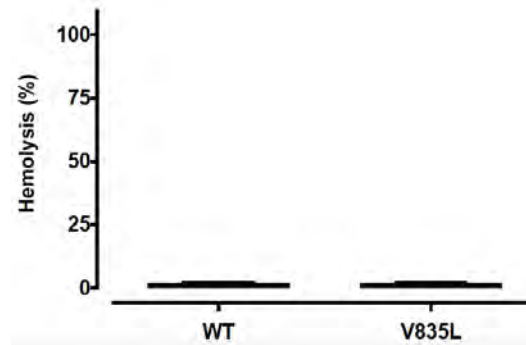

Cofactor activity

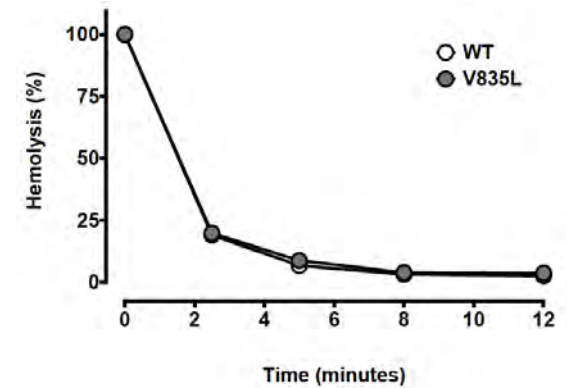

Decay-accelerating activity

# c.2650T>C (S884P)

CADD: 12.28  
gnomAD:  $3 \times 10^{-5}$

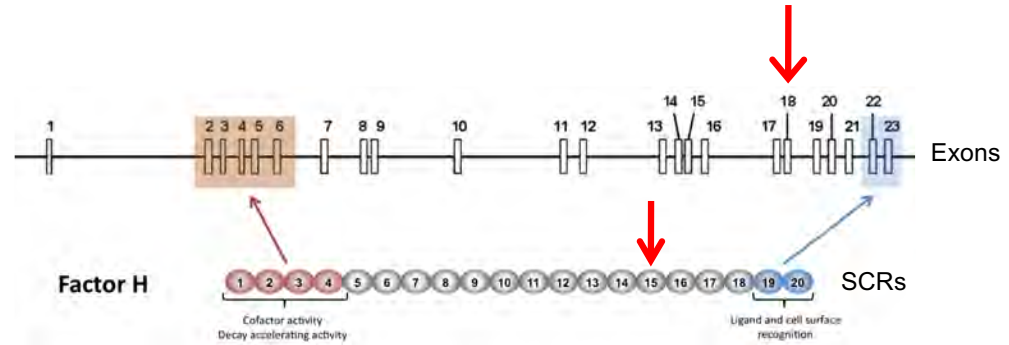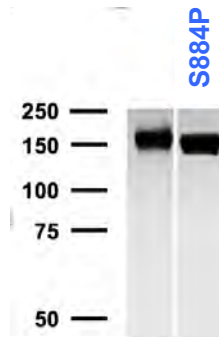

SDS-PAGE  
(Non-reduced)

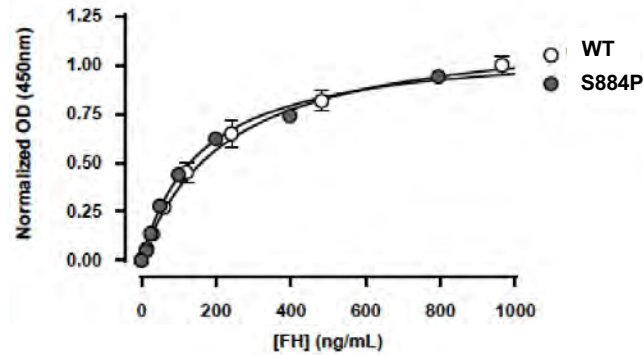

Binding to C3b

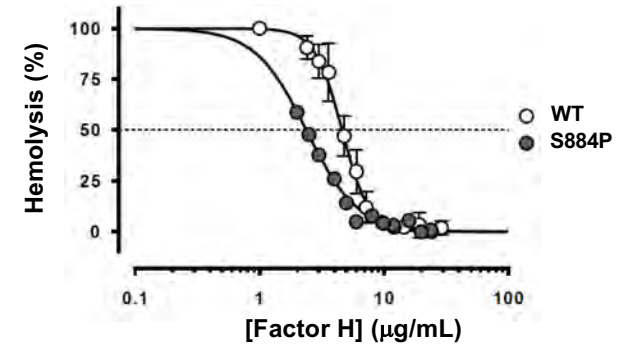

Hemolytic assay

**Conclusion: Normal Function**  
**BENIGN**

Previous studies: None

**Comments:**

This variant migrates slightly faster in SDS-PAGE which may indicate a slightly decreased size. Perhaps losing Ser889 eliminates a O-glycosylation site, although no O-glycosylation sites have been described in factor H.

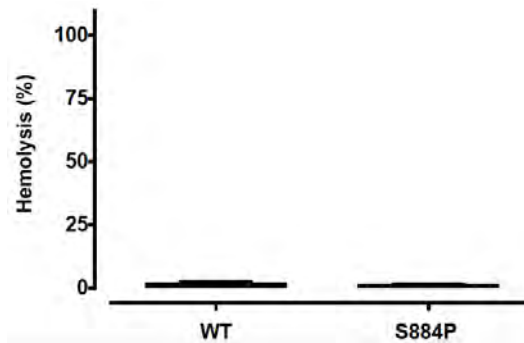

Cofactor activity

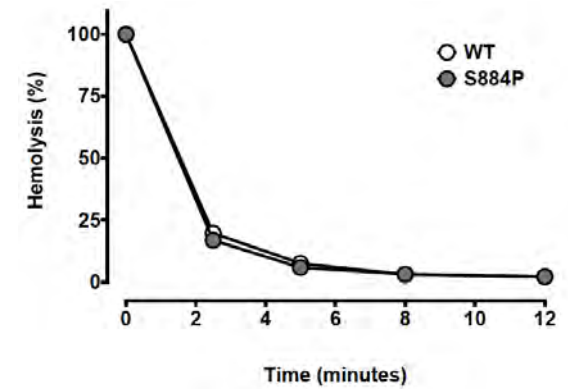

Decay-accelerating activity



# c.2695T>G (Y899D)

**CADD: 23**  
**gnomAD: Not present**

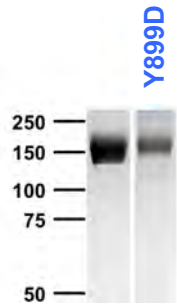

**SDS-PAGE**  
(Non-reduced)

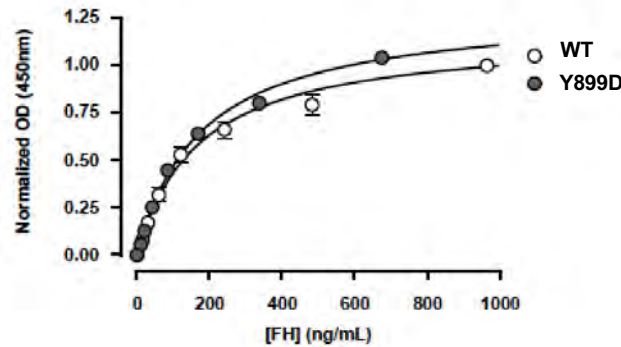

**Binding to C3b**

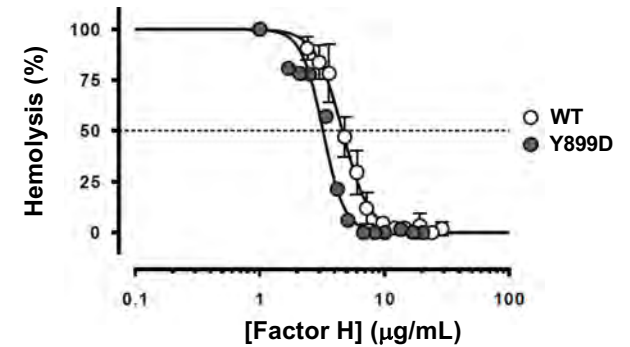

**Hemolytic assay**

**Conclusion: Impaired Expression**  
**PATHOGENIC**

**Previous studies:** Non expression in Johnson SA, Williams JM, Hakobyan S, et al. Impact of compound heterozygous complement factor H mutations on development of atypical hemolytic uremic syndrome—A pedigree revisited. *Molecular Immunology*. 2010;47(7):1585-1591.

**Comments:** SDS-PAGE shows a weak FH band under non-reducing conditions, suggesting that this variant likely affects expression of the protein and results in a factor H deficiency.

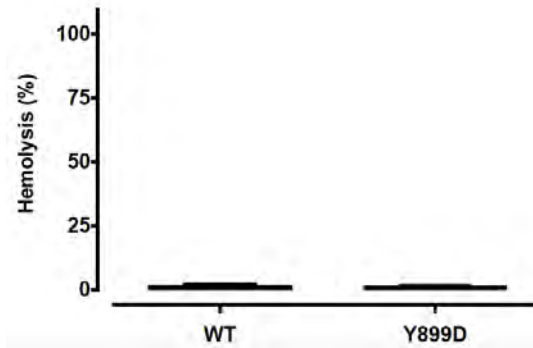

**Cofactor activity**

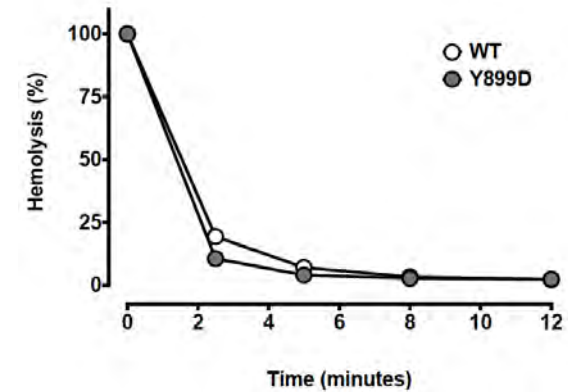

**Decay-accelerating activity**

# c.2850G>T (Q950H)

CADD: 14.17  
gnomAD:  $3 \times 10^{-3}$

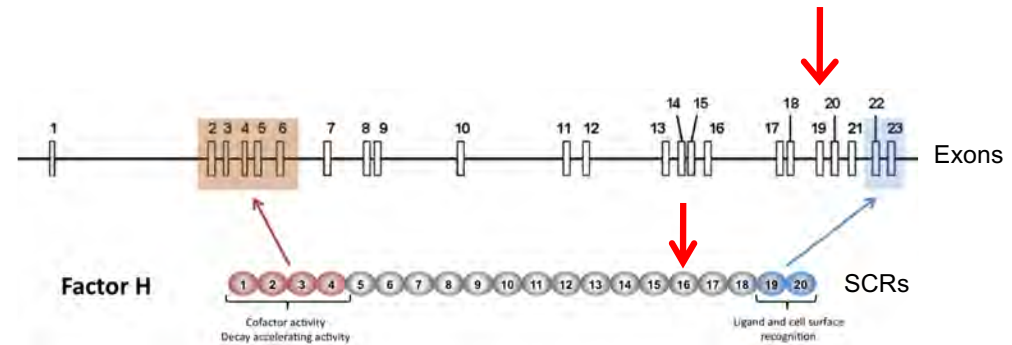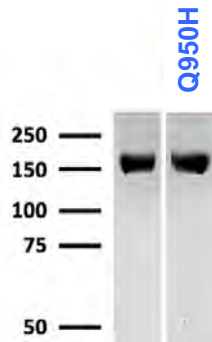

SDS-PAGE  
(Non-reduced)

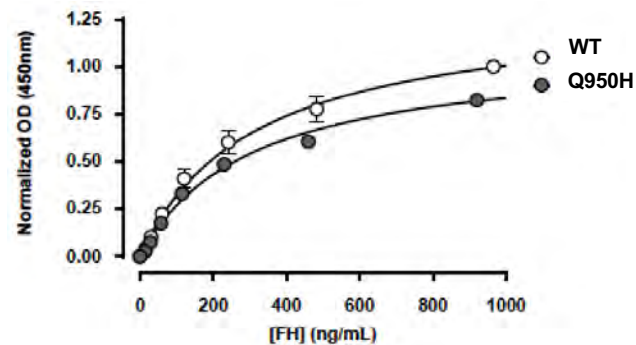

Binding to C3b

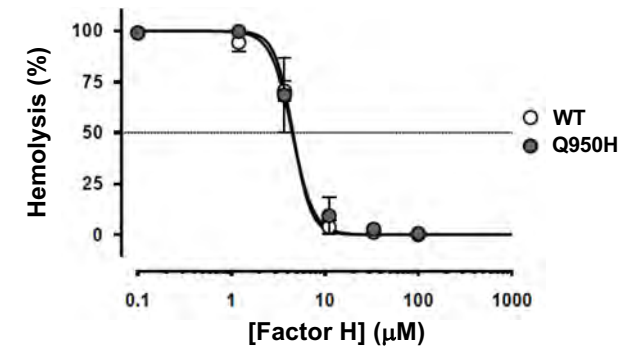

Hemolytic assay

**Conclusion: Normal Function  
BENIGN**

**Previous studies:** Benign in Mohlin FC, Nilsson SC, Levart TK, et al. Functional characterization of two novel non-synonymous alterations in CD46 and a Q950H change in factor H found in atypical hemolytic uremic syndrome patients. *Molecular Immunology*. 2015;65(2):367-376.

**Comments:**

Common polymorphism that does not affect function

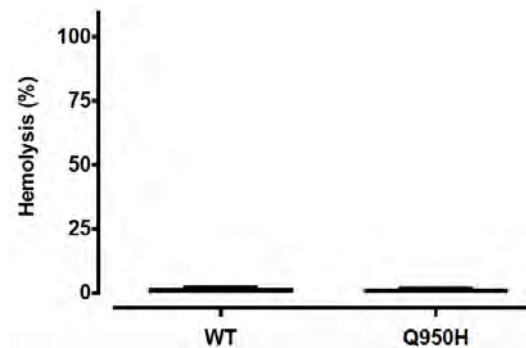

Cofactor activity

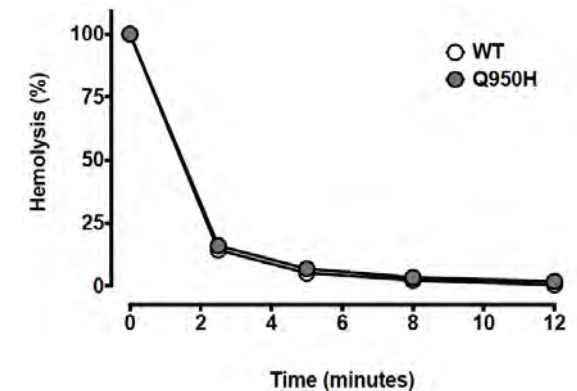

Decay-accelerating activity

# c.2851T>C (Y951H)

CADD: 14.6  
gnomAD:  $1 \times 10^{-5}$

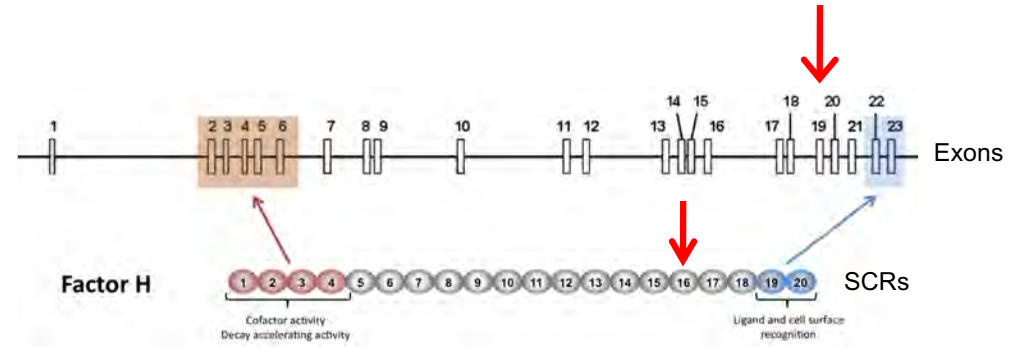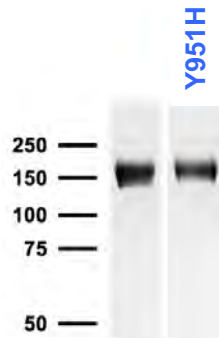

SDS-PAGE  
(Non-reduced)

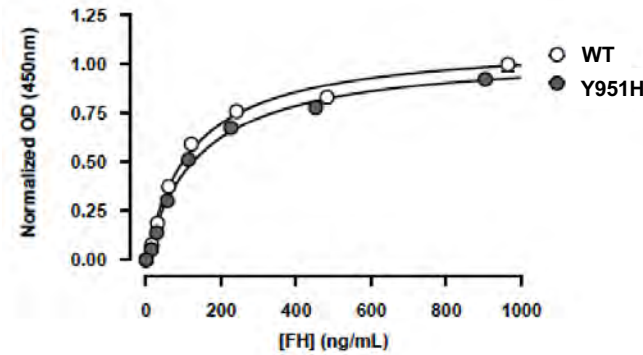

Binding to C3b

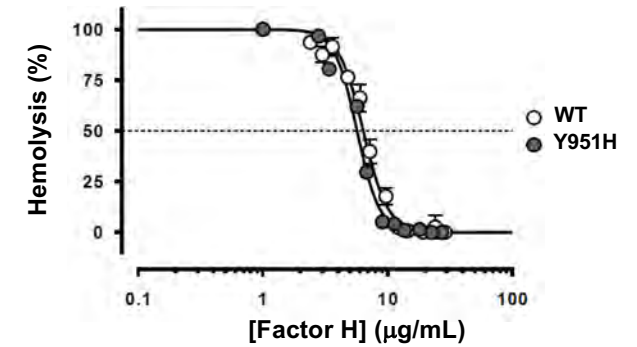

Hemolytic assay

Conclusion: Normal Function  
BENIGN

Previous studies: None

Comments:

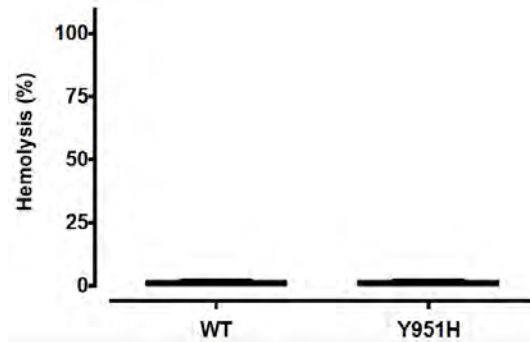

Cofactor activity

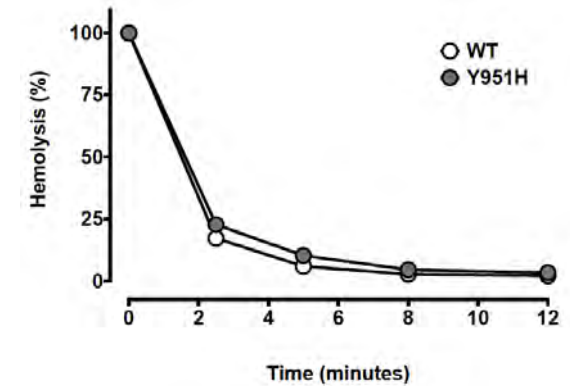

Decay-accelerating activity

# c.2867C>T (T956M)

CADD: 14.99  
gnomAD:  $1 \times 10^{-3}$

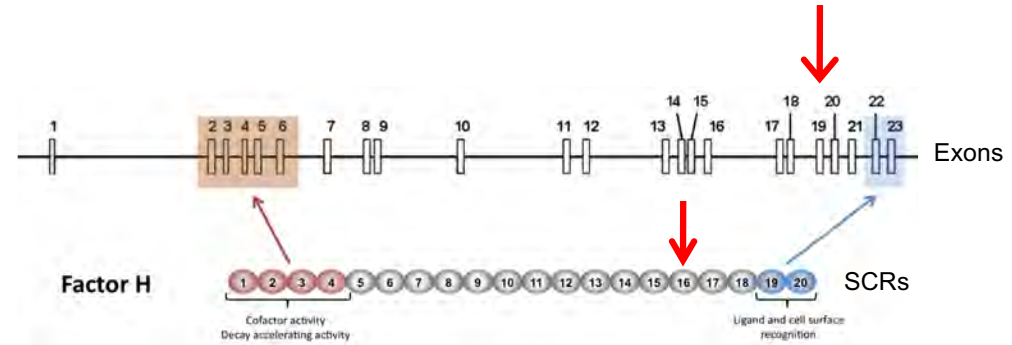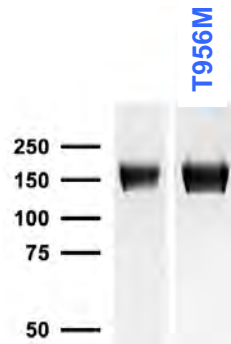

SDS-PAGE  
(Non-reduced)

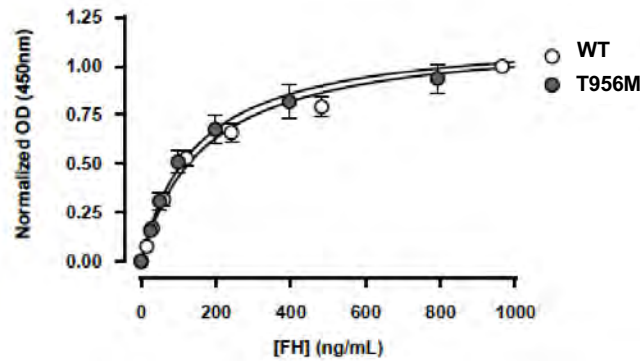

Binding to C3b

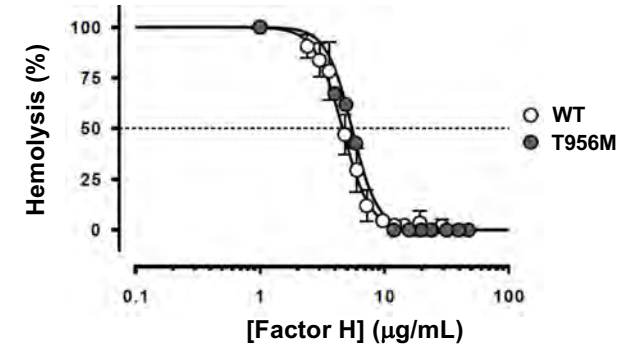

Hemolytic assay

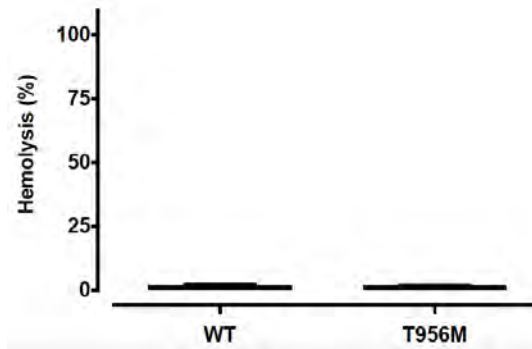

Cofactor activity

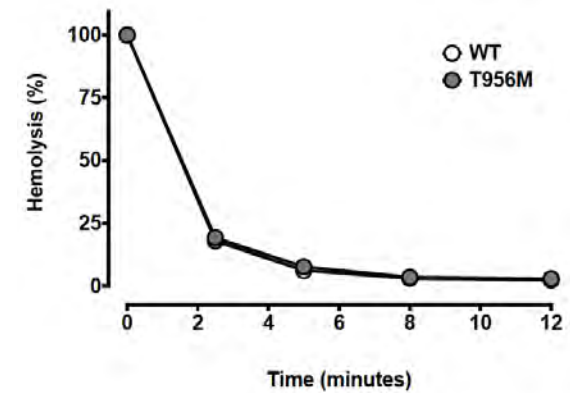

Decay-accelerating activity

**Conclusion: Normal Function  
BENIGN**

**Previous studies:** Benign in by Merinero HM, García SP, García-Fernández J, Arjona E, Tortajada A, Rodríguez de Córdoba S. Complete functional characterization of disease-associated genetic variants in the complement factor H gene. *Kidney International*. 2018;93(2):470-481.

Comments:

# c.2879T>C (F960S)

CADD: 0  
gnomAD:  $6 \times 10^{-5}$

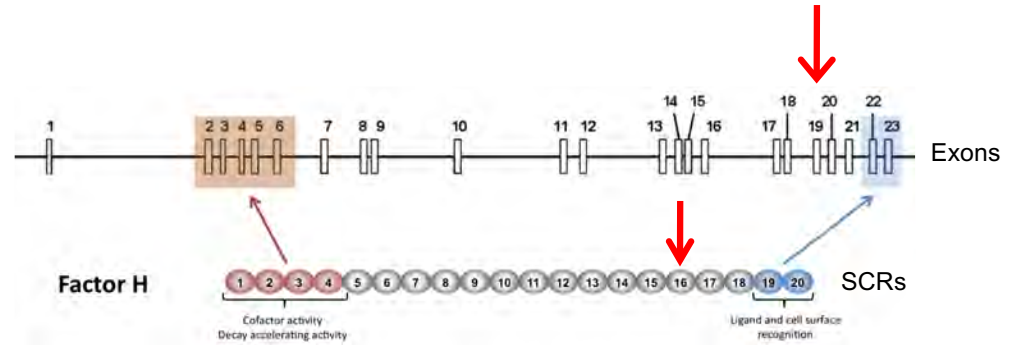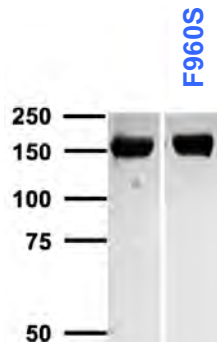

SDS-PAGE  
(Non-reduced)

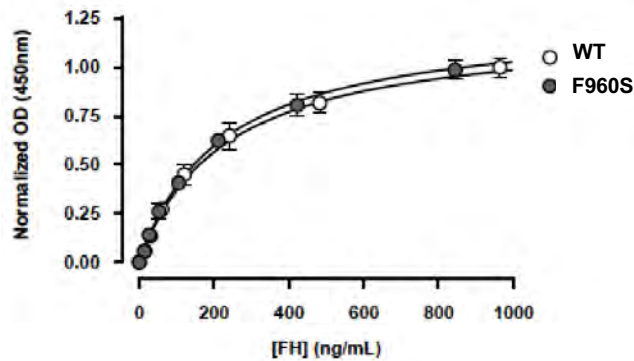

Binding to C3b

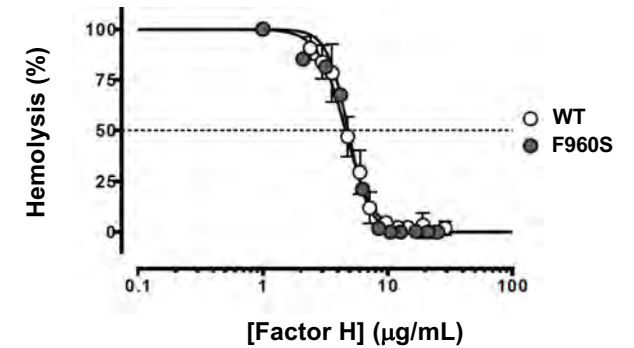

Hemolytic assay

Conclusion: Normal Function  
BENIGN

Previous studies: None

Comments:

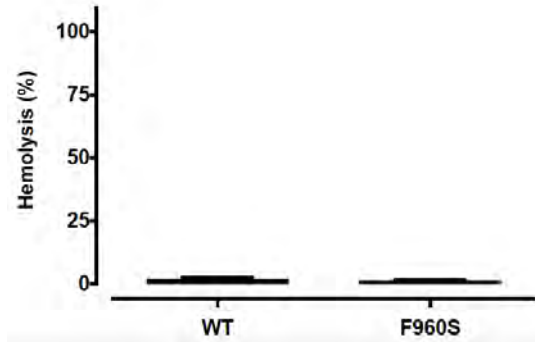

Cofactor activity

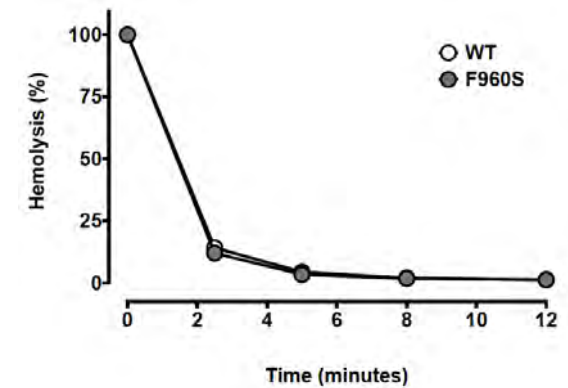

Decay-accelerating activity

# c.2918G>A (C973Y)

**CADD: 22.8**  
**gnomAD: Not present**

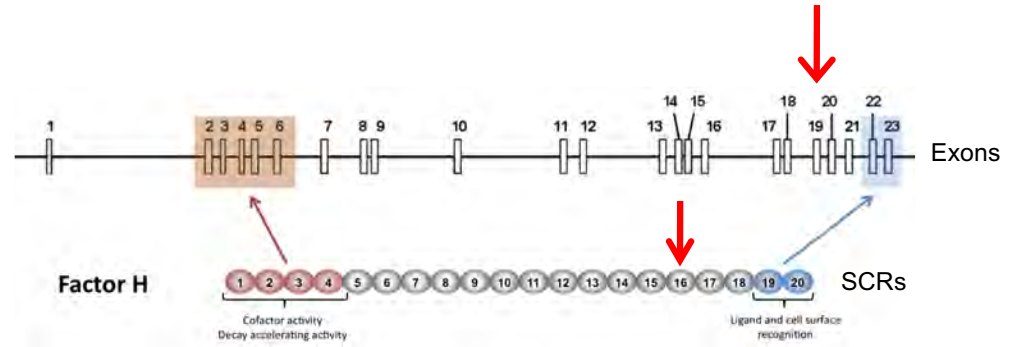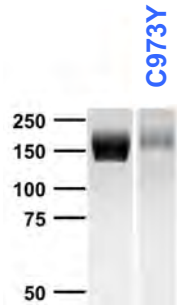

**SDS-PAGE**  
(Non-reduced)

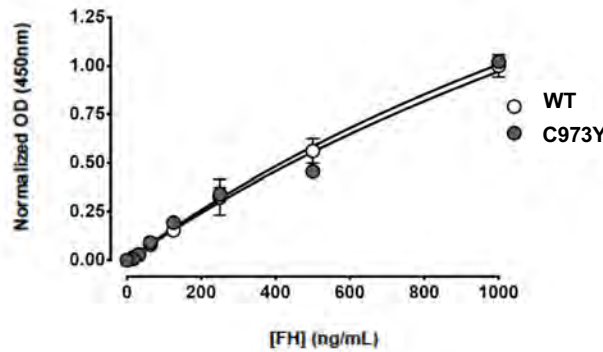

**Binding to C3b**

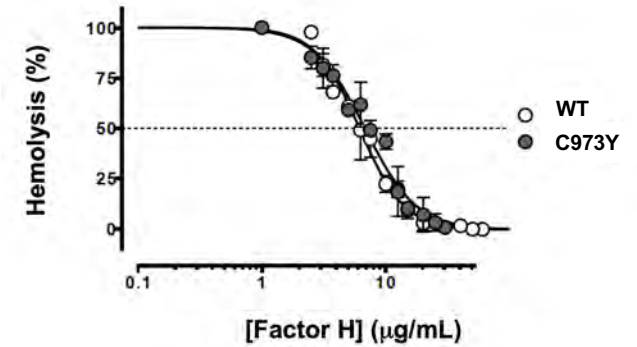

**Hemolytic assay**

**Conclusion: Impaired Expression**  
**PATHOGENIC**

**Previous studies:** Non expression in Saland JM, Emre SH, Shneider BL, et al. Favorable Long-Term Outcome after Liver-Kidney Transplant for Recurrent Hemolytic Uremic Syndrome Associated with a Factor H Mutation. *American Journal of Transplantation*. 2006;6(8):1948-1952.

**Comments:** SDS-PAGE shows a weak FH band under non-reducing conditions, suggesting that this variant likely affects expression of the protein and results in a factor H deficiency.

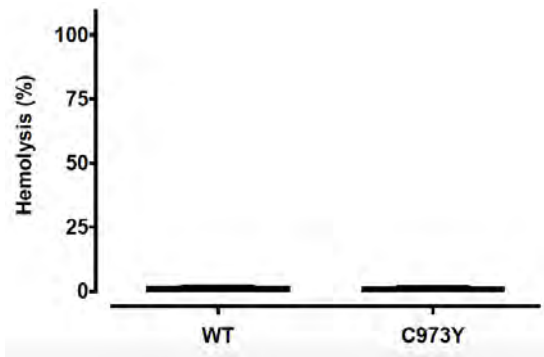

**Cofactor activity**

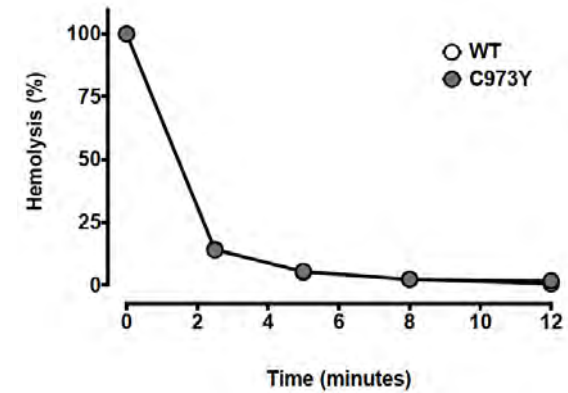

**Decay-accelerating activity**

# c.3050C>T (T1017I)

CADD: 10.49  
gnomAD:  $1 \times 10^{-3}$

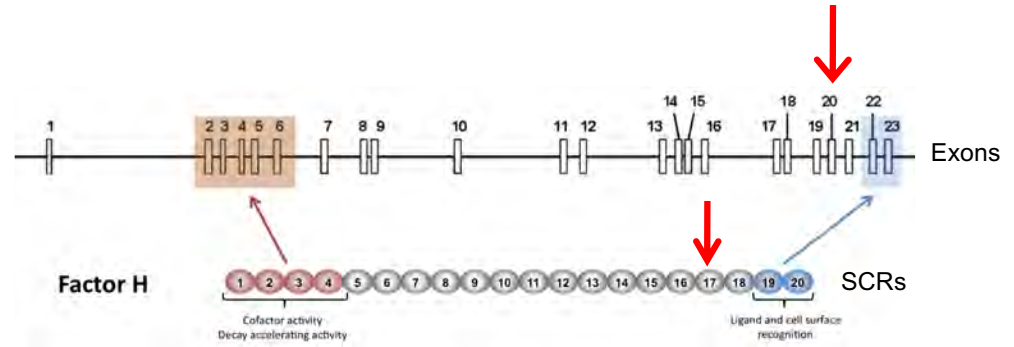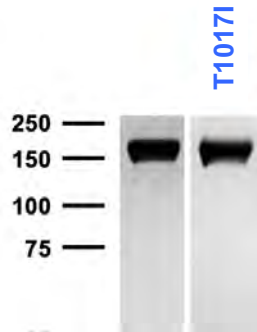

SDS-PAGE  
(Non-reduced)

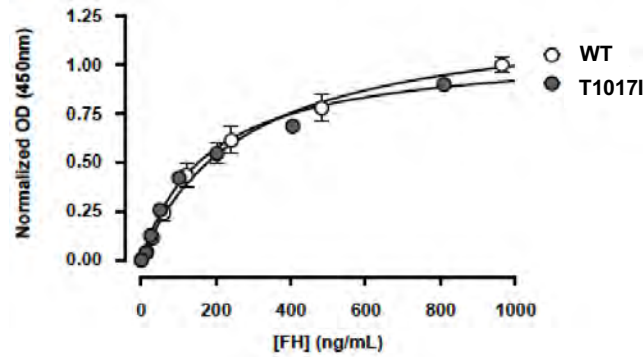

Binding to C3b

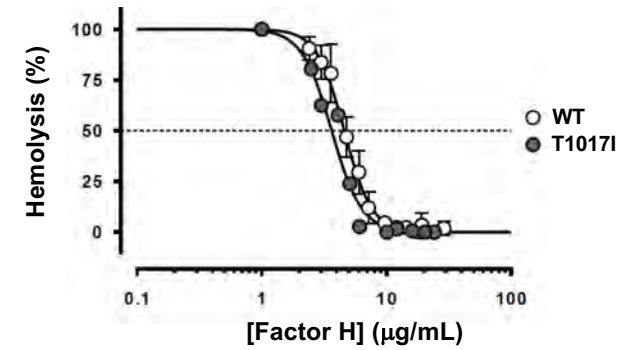

Hemolytic assay

Conclusion: Normal Function  
**BENIGN**

Previous studies: None

Comments:

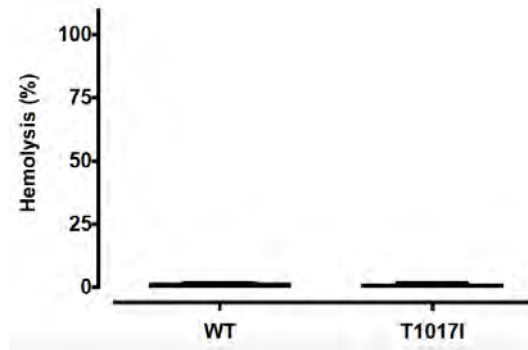

Cofactor activity

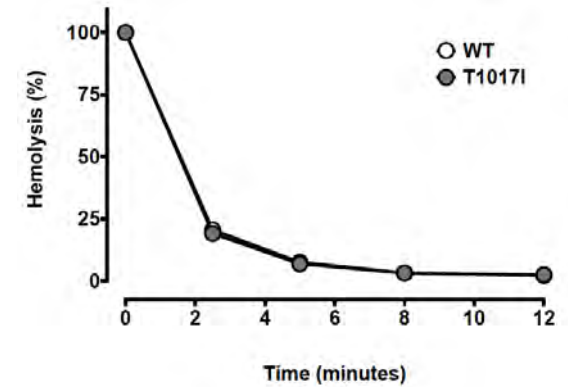

Decay-accelerating activity

# c.3062A>T (Y1021F)

**CADD: 0.84**  
**gnomAD: Not present**

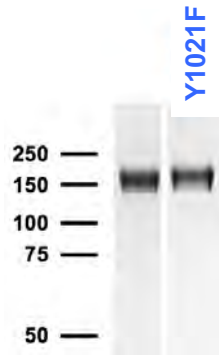

SDS-PAGE  
(Non-reduced)

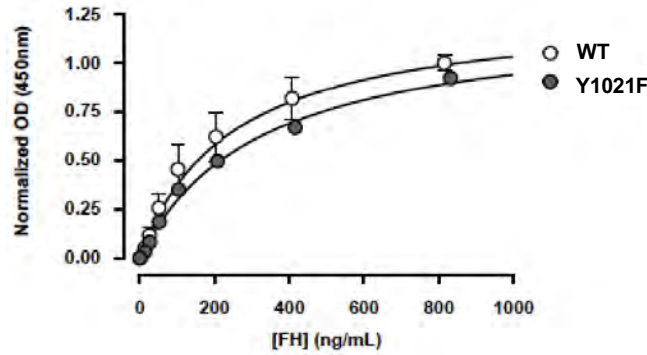

Binding to C3b

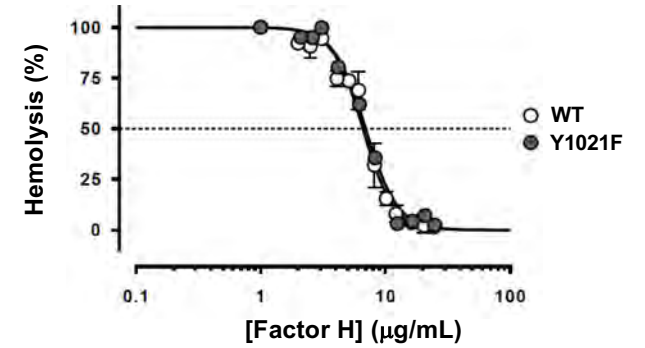

Hemolytic assay

**Conclusion: Normal Function**  
**BENIGN**

Previous studies: None

Comments:

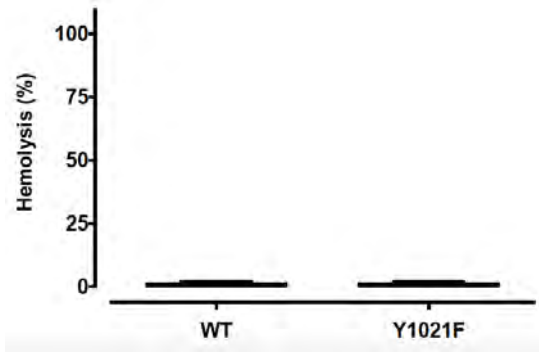

Cofactor activity

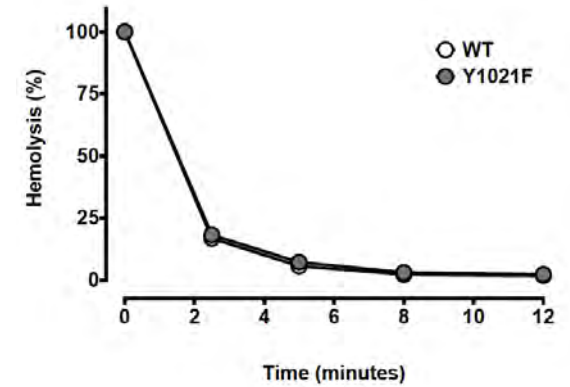

Decay-accelerating activity



# c.3079G>C (A1027P)

CADD: 0  
gnomAD:  $6 \times 10^{-5}$

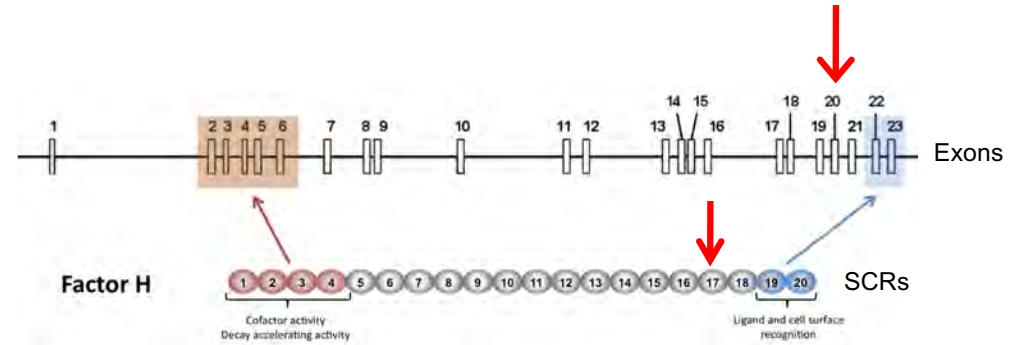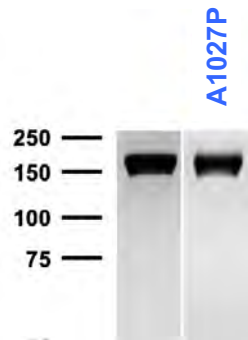

SDS-PAGE  
(Non-reduced)

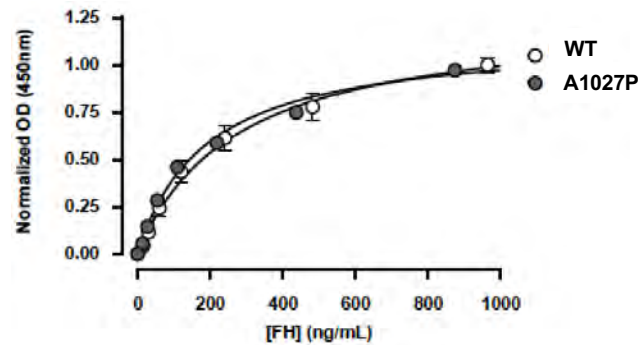

Binding to C3b

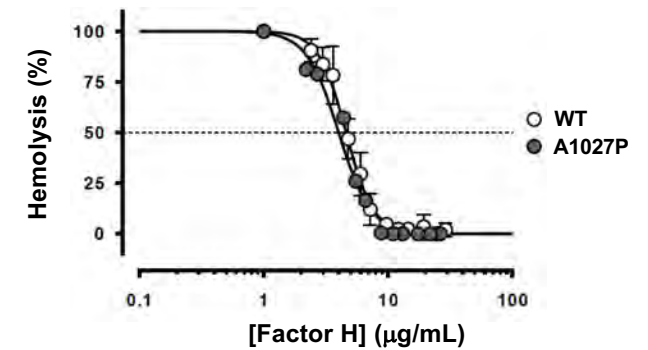

Hemolytic assay

Conclusion: Normal Function  
BENIGN

Previous studies: None

Comments:

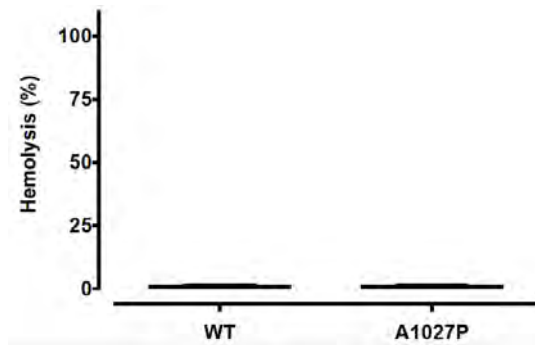

Cofactor activity

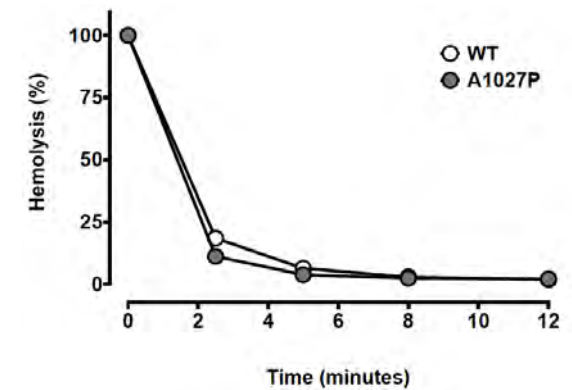

Decay-accelerating activity

# c.3148A>T (N1050Y)

CADD: 14.17  
gnomAD:  $1 \times 10^{-2}$

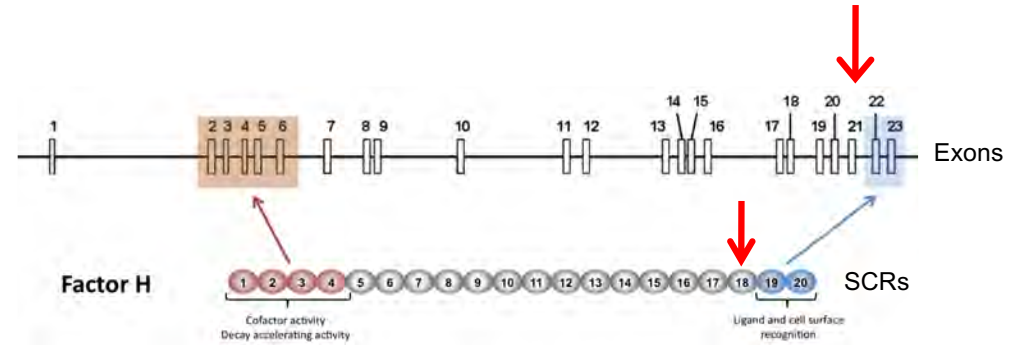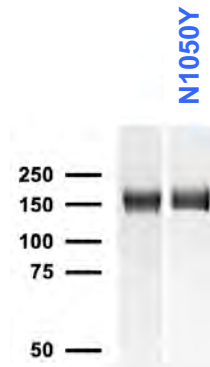

SDS-PAGE  
(Non-reduced)

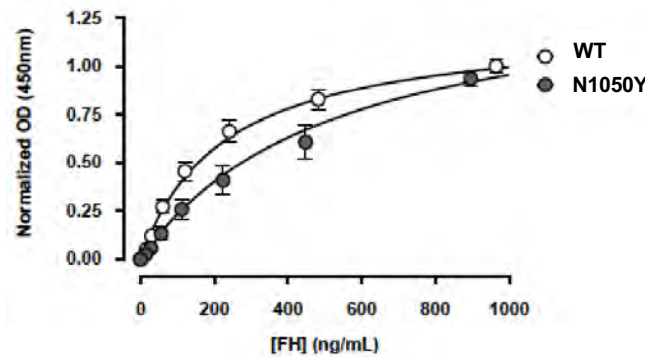

Binding to C3b

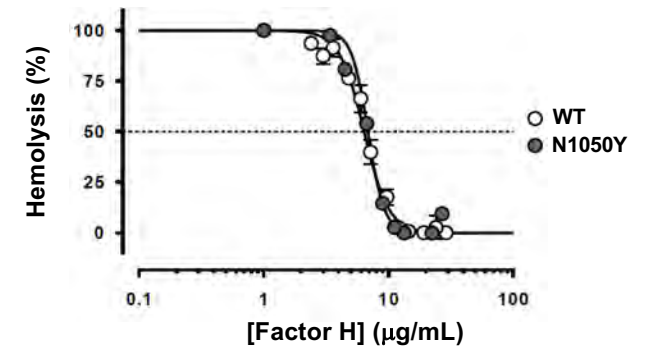

Hemolytic assay

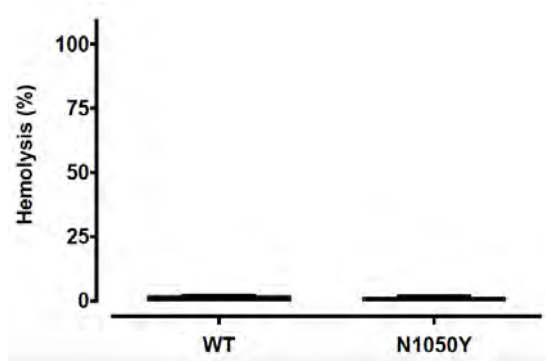

Cofactor activity

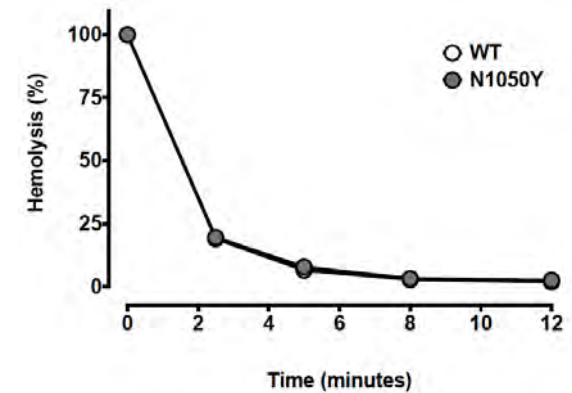

Decay-accelerating activity

**Conclusion: Normal Function  
BENIGN**

**Previous studies:** Benign in Richards A, Buddles MR, Donne RL, et al. Factor H Mutations in Hemolytic Uremic Syndrome Cluster in Exons 18–20, a Domain Important for Host Cell Recognition. *The American Journal of Human Genetics*. 2001;68(2):485-490.

**Comments:**

Common polymorphism that does not affect function

# c.3160G>A (V1054I)

CADD: 16.12  
gnomAD:  $5 \times 10^{-5}$

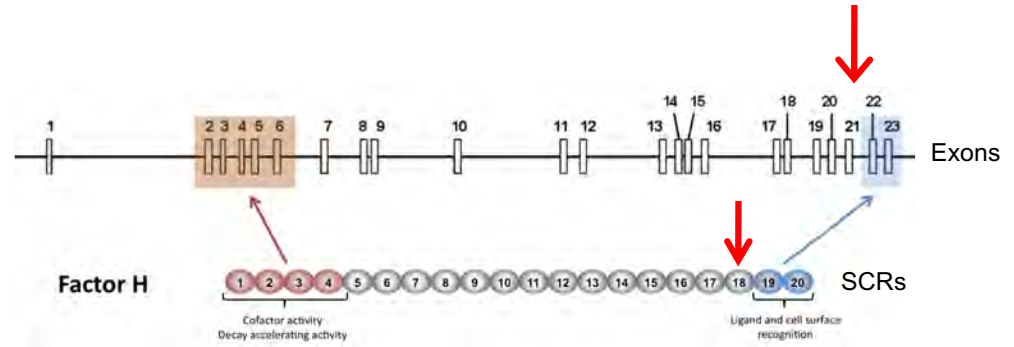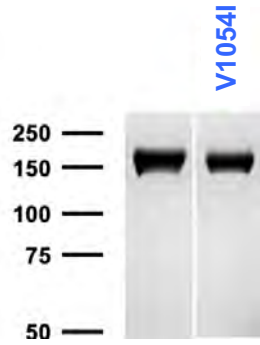

SDS-PAGE  
(Non-reduced)

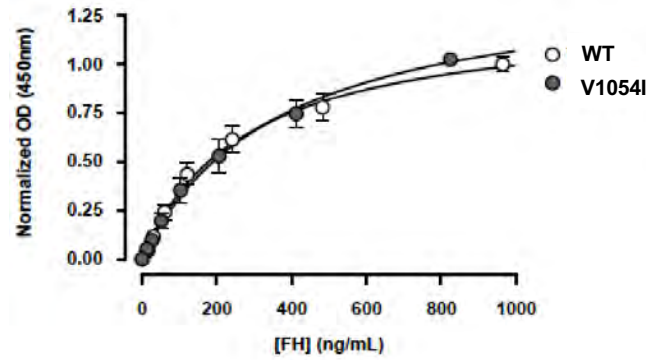

Binding to C3b

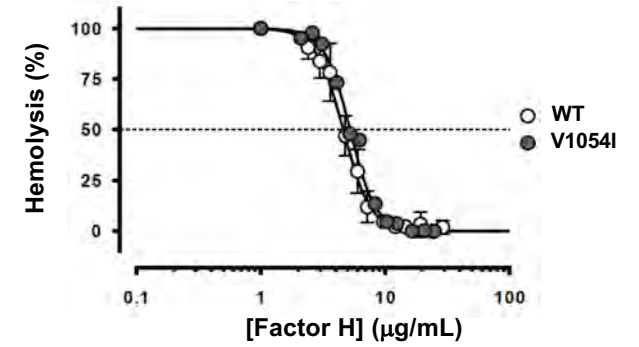

Hemolytic assay

Conclusion: Normal Function  
**BENIGN**

Previous studies: None

Comments:

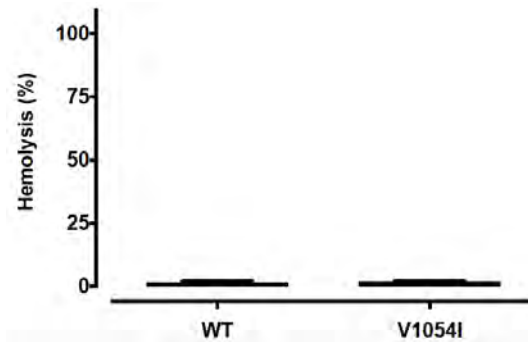

Cofactor activity

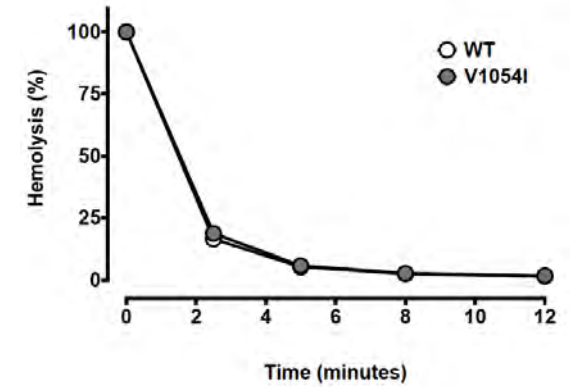

Decay-accelerating activity

# c.3172T>C (Y1058H)

CADD: 0  
gnomAD:  $6 \times 10^{-4}$

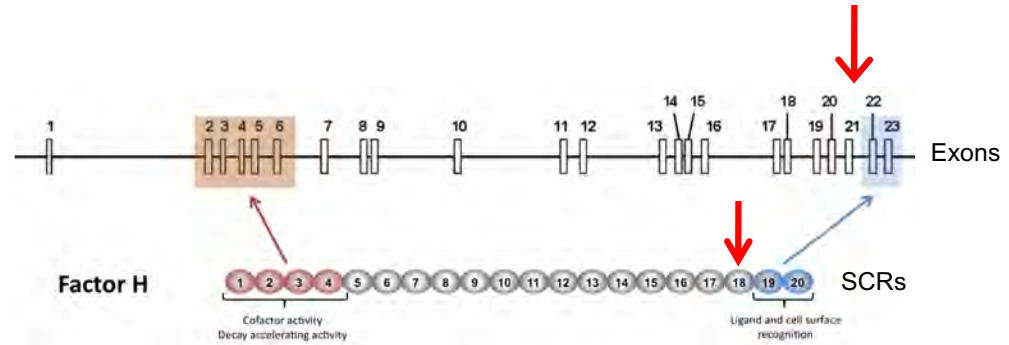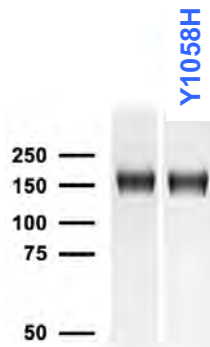

SDS-PAGE  
(Non-reduced)

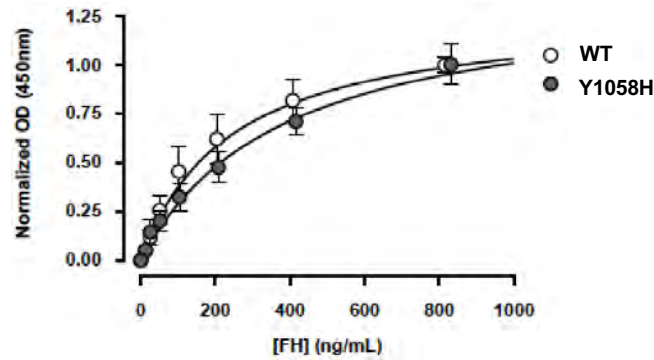

Binding to C3b

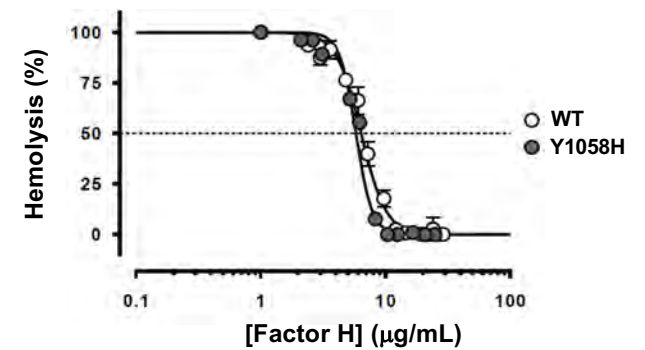

Hemolytic assay

Conclusion: Normal Function  
BENIGN

Previous studies: None

Comments:

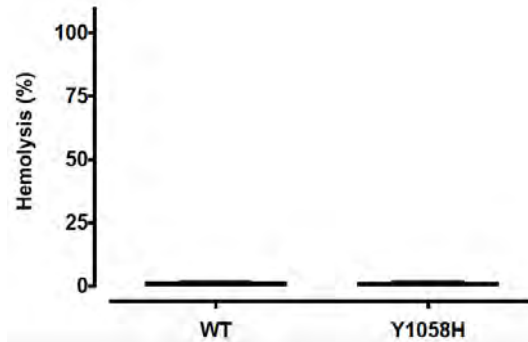

Cofactor activity

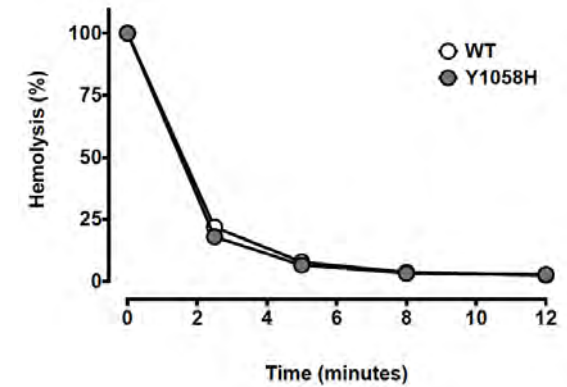

Decay-accelerating activity

# c.3176T>C (I1059T)

CADD: 12.6  
gnomAD:  $7 \times 10^{-3}$

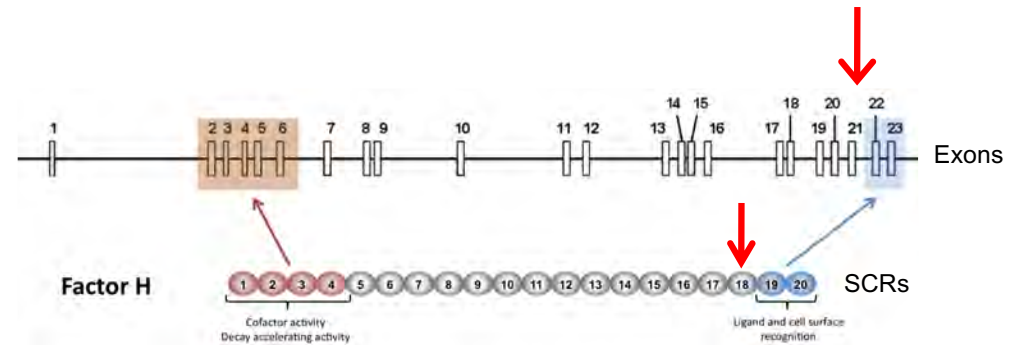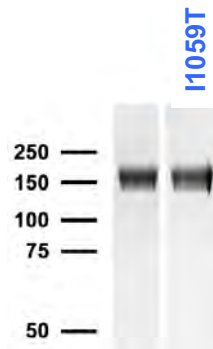

SDS-PAGE  
(Non-reduced)

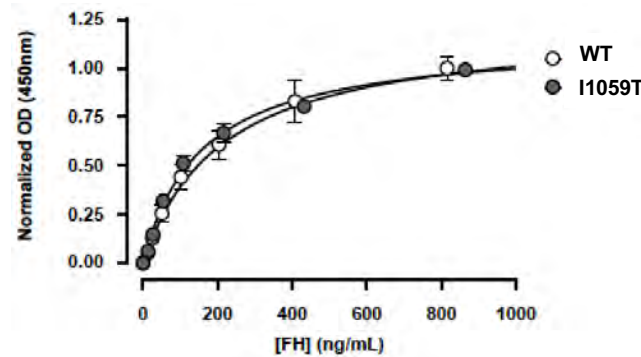

Binding to C3b

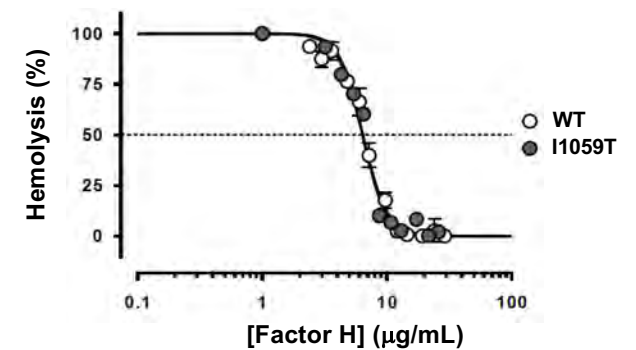

Hemolytic assay

Conclusion: Normal Function  
BENIGN

Previous studies: None

Comments:

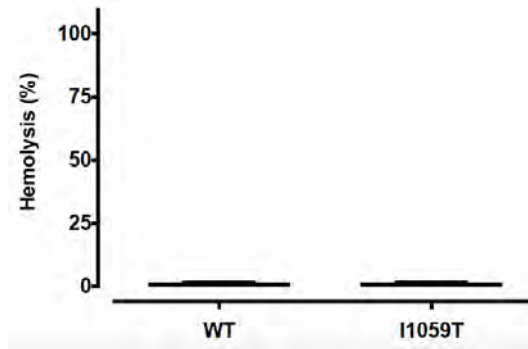

Cofactor activity

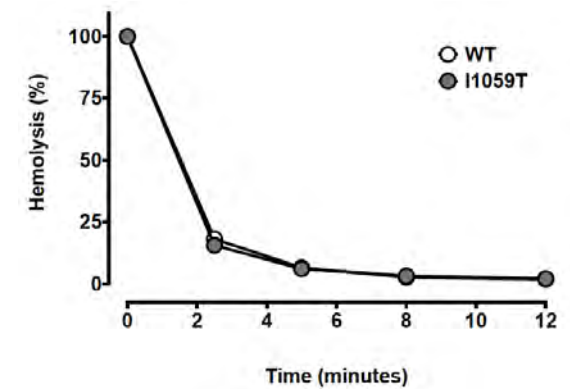

Decay-accelerating activity

# c.3178G>C (V1060L)

CADD: 0  
gnomAD:  $5 \times 10^{-4}$

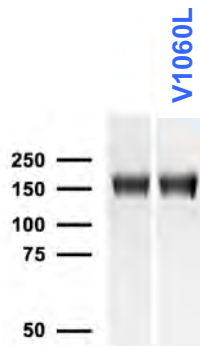

SDS-PAGE  
(Non-reduced)

**Conclusion: Normal Function  
BENIGN**

Previous studies: None

Comments:

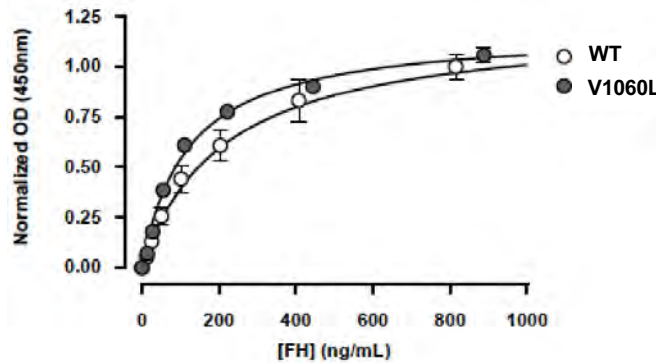

Binding to C3b

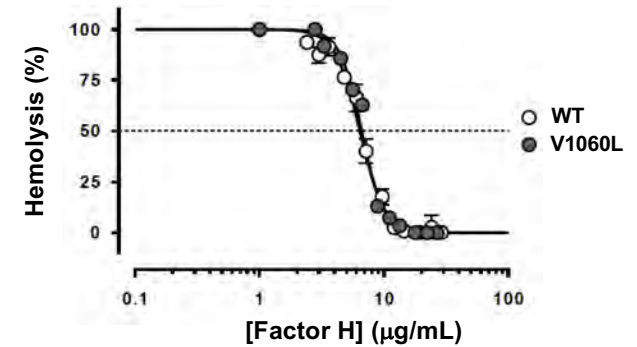

Hemolytic assay

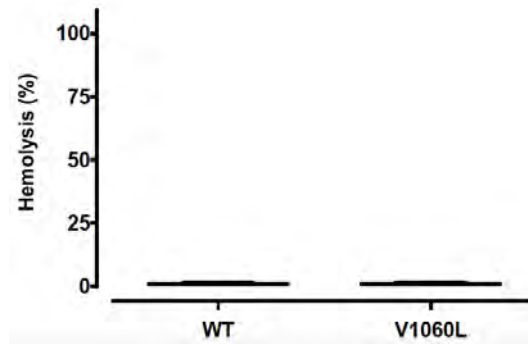

Cofactor activity

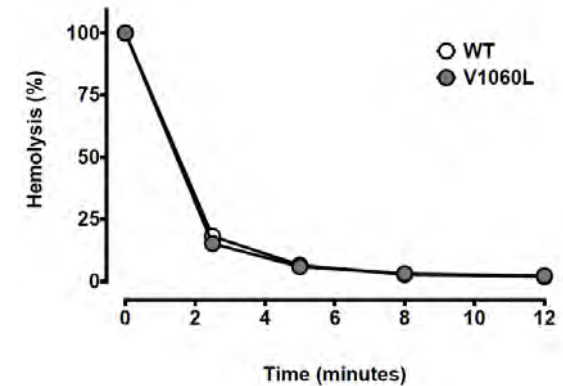

Decay-accelerating activity

# c.3179T>C (V1060A)

**CADD: 1.25**  
**gnomAD: Not present**

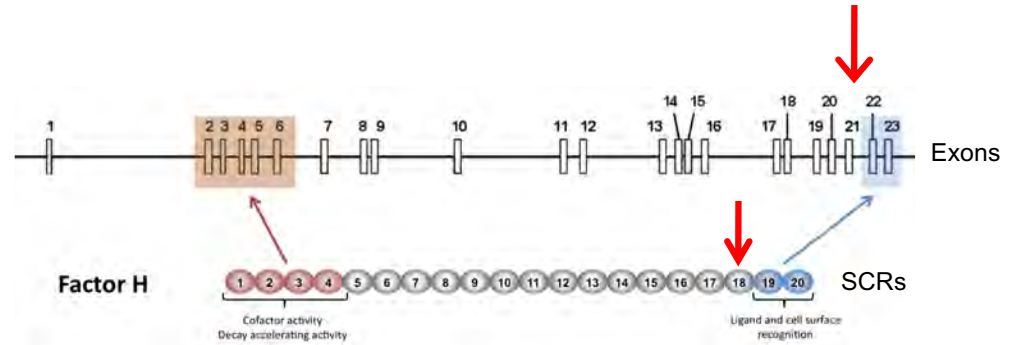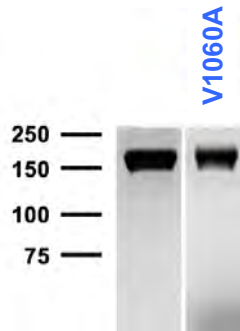

SDS-PAGE  
(Non-reduced)

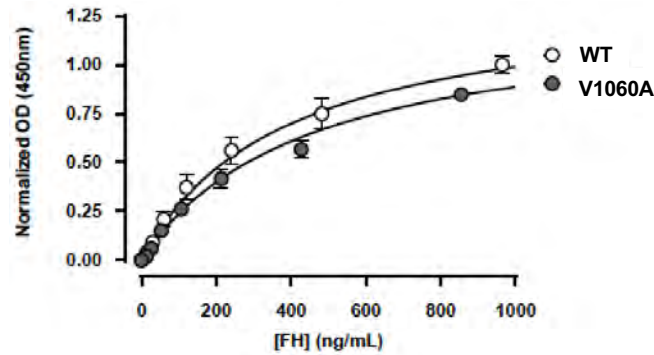

Binding to C3b

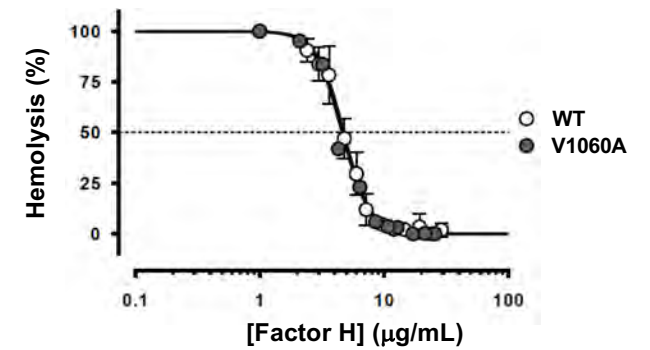

Hemolytic assay

**Conclusion: Normal Function**  
**BENIGN**

Previous studies: None

Comments:

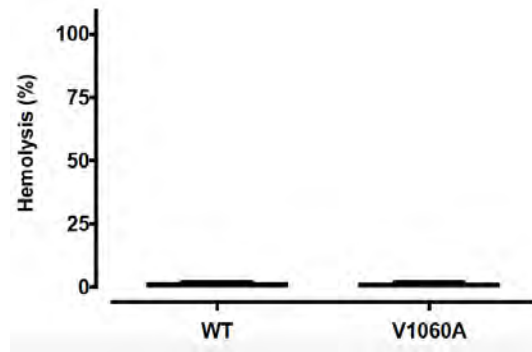

Cofactor activity

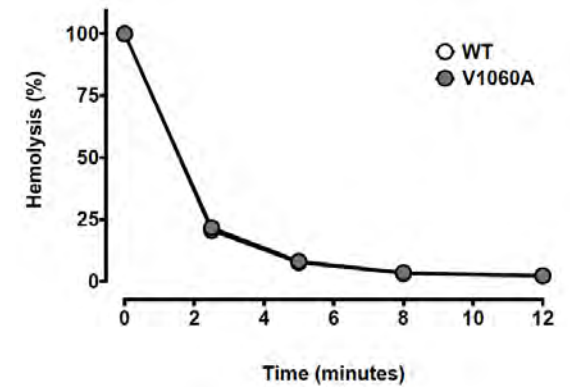

Decay-accelerating activity

# c.3181T>C (S1061P)

CADD: 4.84  
gnomAD: Not present

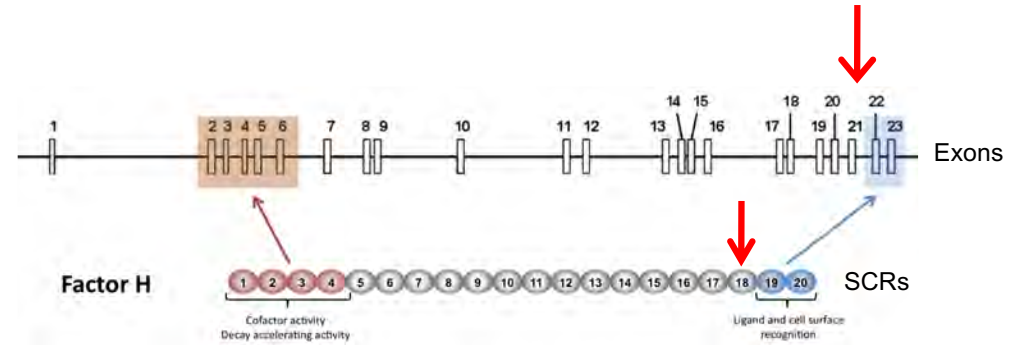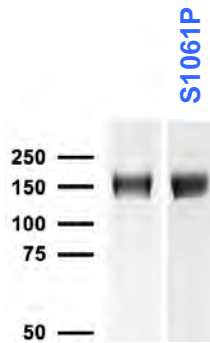

SDS-PAGE  
(Non-reduced)

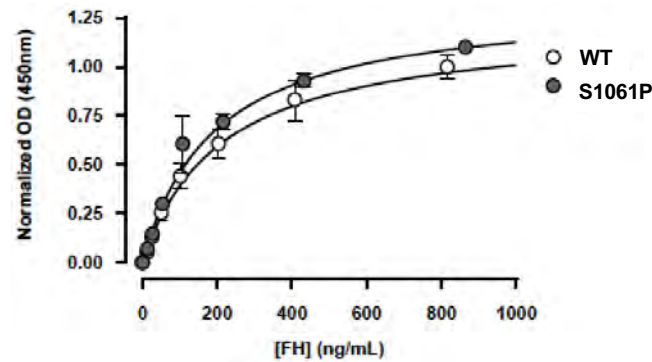

Binding to C3b

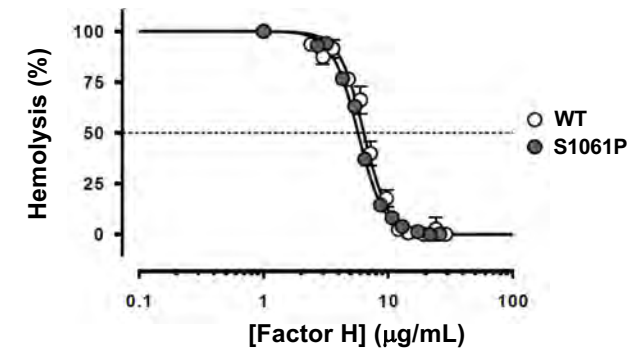

Hemolytic assay

Conclusion: Normal Function  
BENIGN

Previous studies: None

Comments:

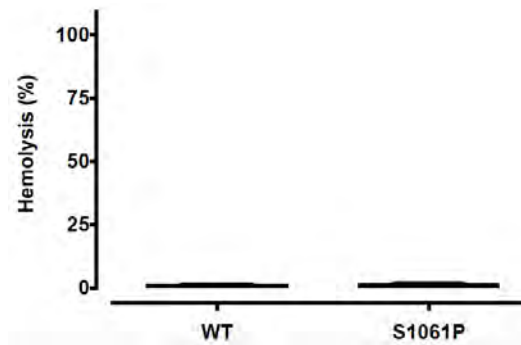

Cofactor activity

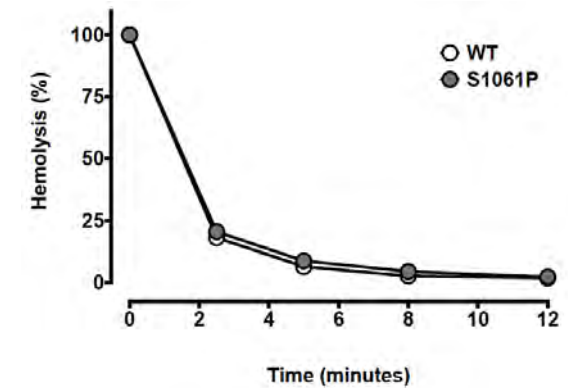

Decay-accelerating activity



# c.3226C>G (Q1076E)

CADD: 3.88  
gnomAD:  $3 \times 10^{-4}$

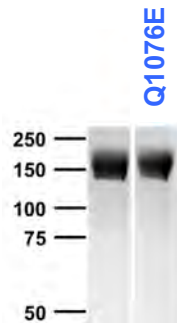

SDS-PAGE  
(Non-reduced)

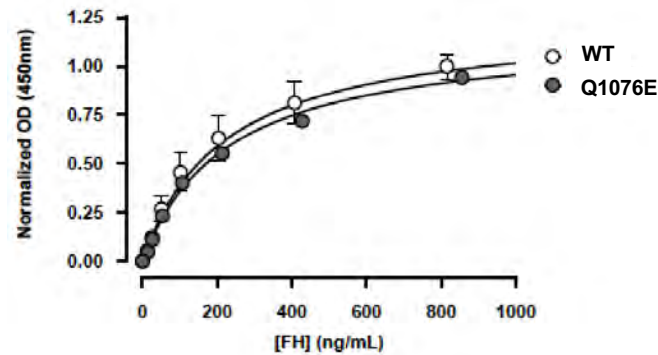

Binding to C3b

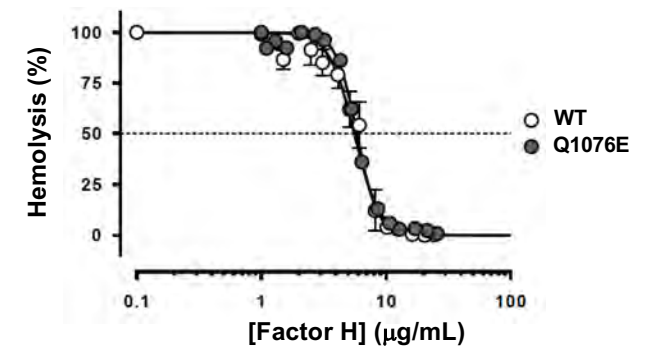

Hemolytic assay

Conclusion: Normal Function  
BENIGN

Previous studies: None

Comments:

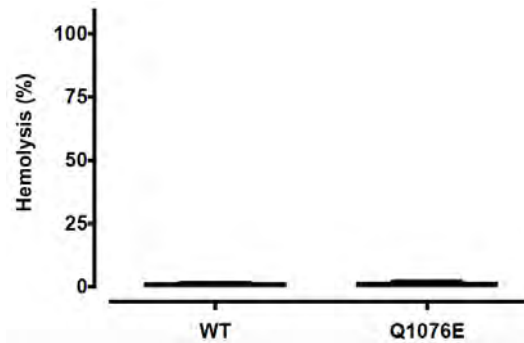

Cofactor activity

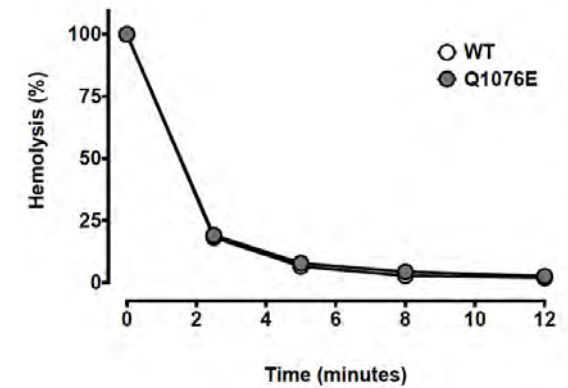

Decay-accelerating activity

# c.3231T>G (C1077W)

**CADD: 23.2**  
**gnomAD: Not present**

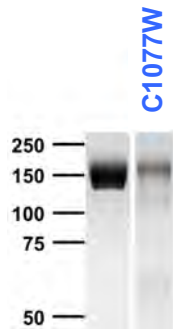

SDS-PAGE  
(Non-reduced)

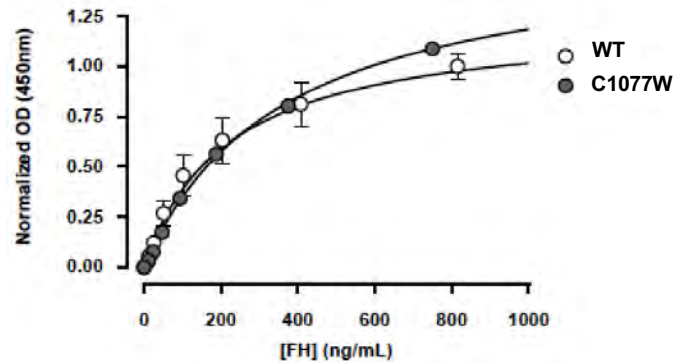

Binding to C3b

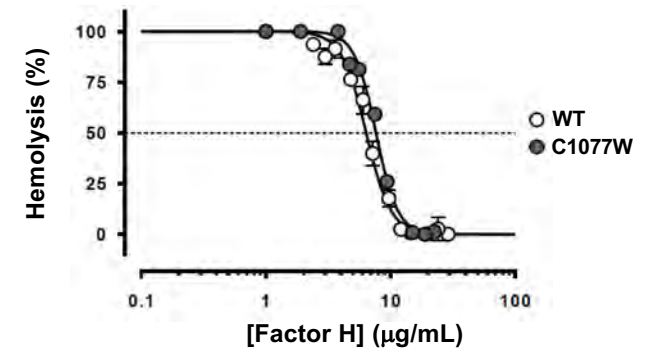

Hemolytic assay

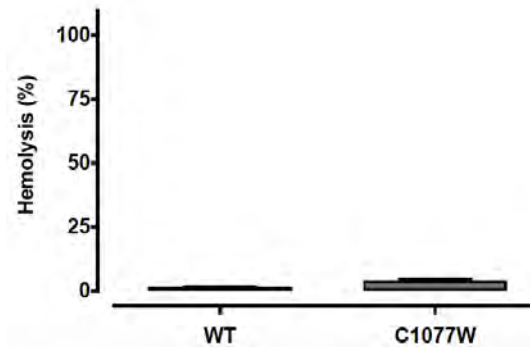

Cofactor activity

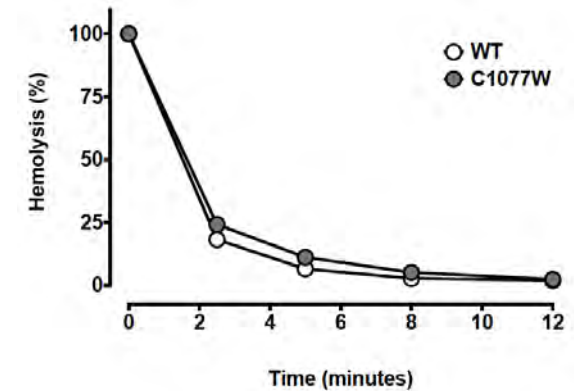

Decay-accelerating activity

**Conclusion: Impaired Expression**  
**PATHOGENIC**

Previous studies: None

**Comments:**

SDS-PAGE shows a weak FH band under non-reducing conditions, suggesting that this variant likely affects expression of the protein and results in a factor H deficiency.

# c.3234G>T (R1078S)

CADD: 3.37  
gnomAD:  $7 \times 10^{-5}$

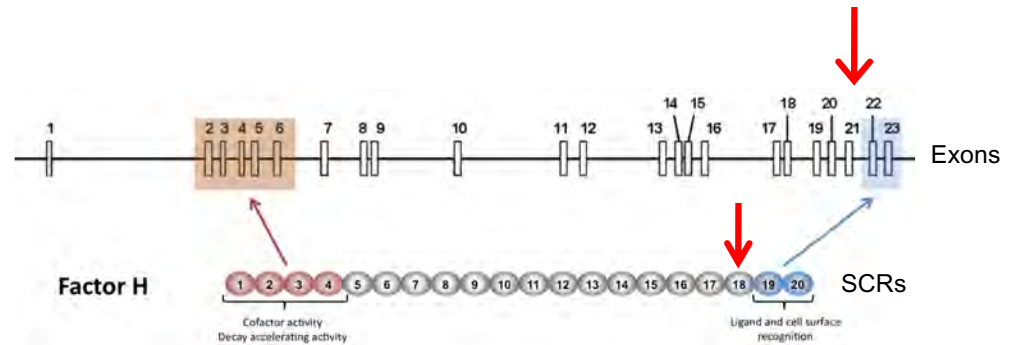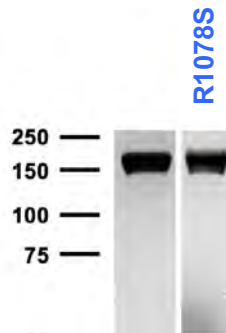

SDS-PAGE  
(Non-reduced)

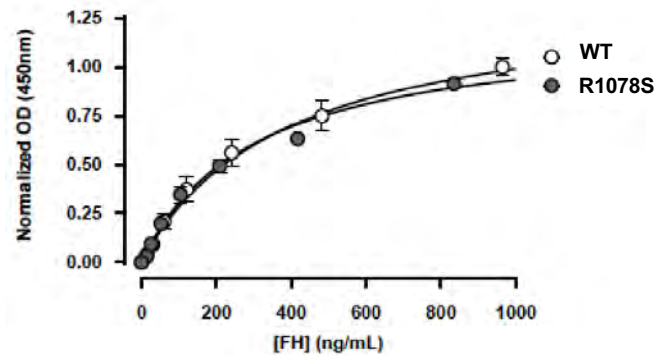

Binding to C3b

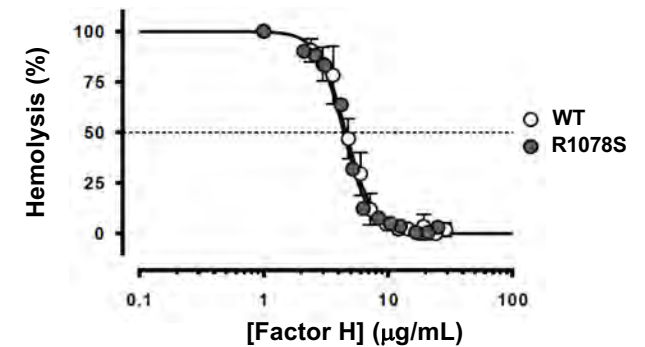

Hemolytic assay

Conclusion: Normal Function  
**BENIGN**

Previous studies: None

Comments:

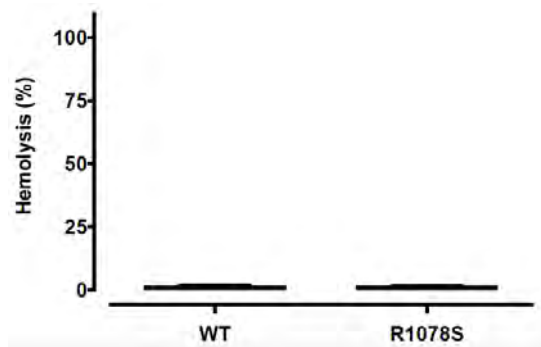

Cofactor activity

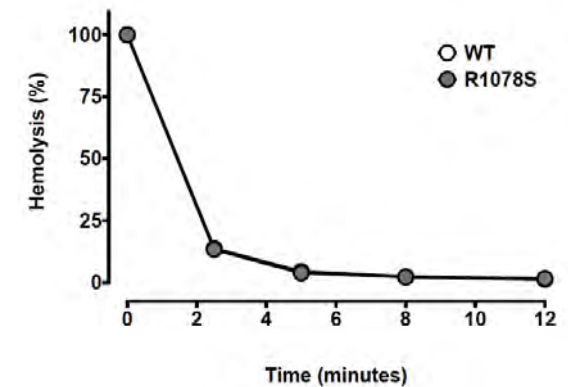

Decay-accelerating activity

# c.3264A>C (E1088D)

**CADD: 18.53**  
**gnomAD: Not present**

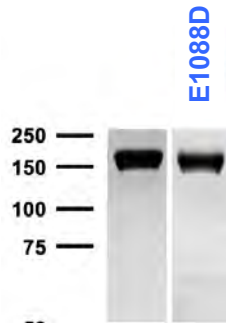

SDS-PAGE  
(Non-reduced)

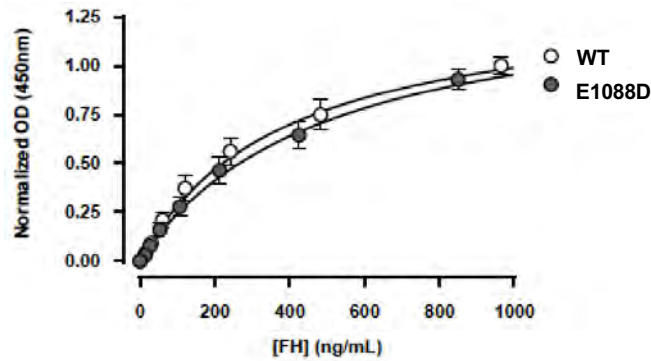

Binding to C3b

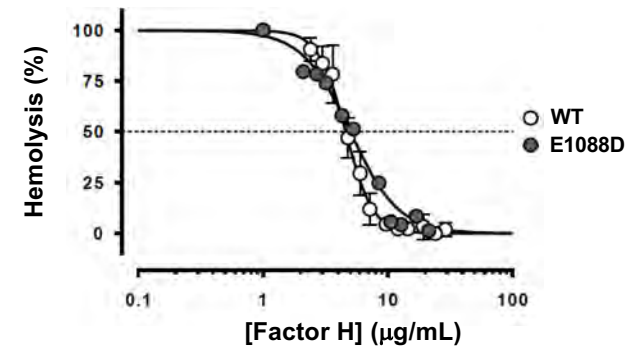

Hemolytic assay

**Conclusion: Normal Function**  
**BENIGN**

Previous studies: None

Comments:

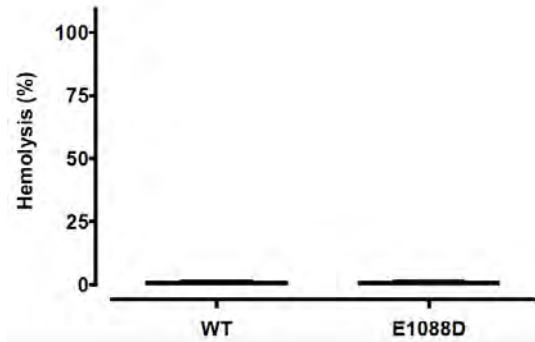

Cofactor activity

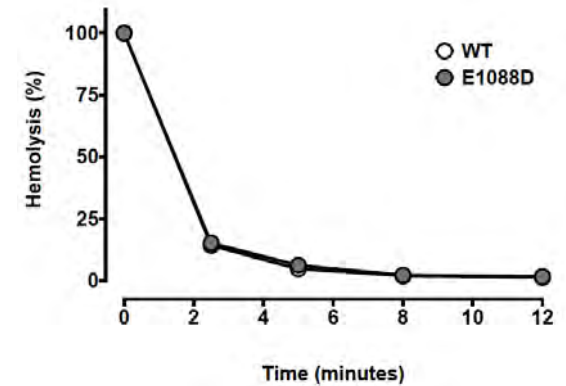

Decay-accelerating activity

# c.3355G>A (D1119N)

**CADD: 24.4**  
**gnomAD: Not present**

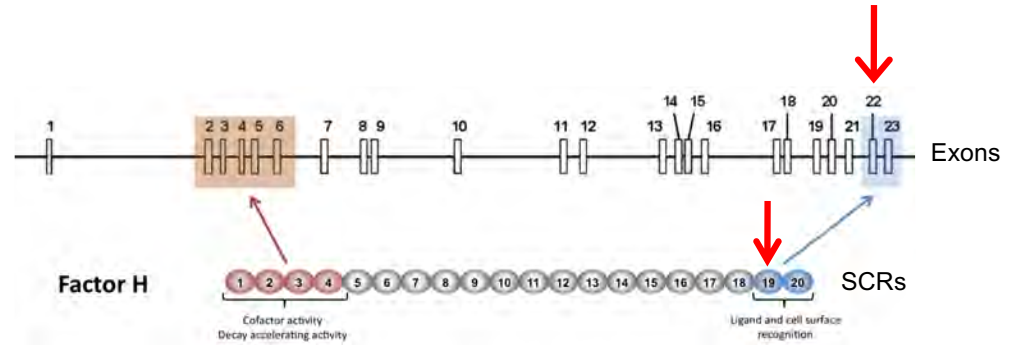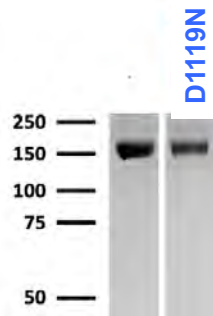

**SDS-PAGE**  
(Non-reduced)

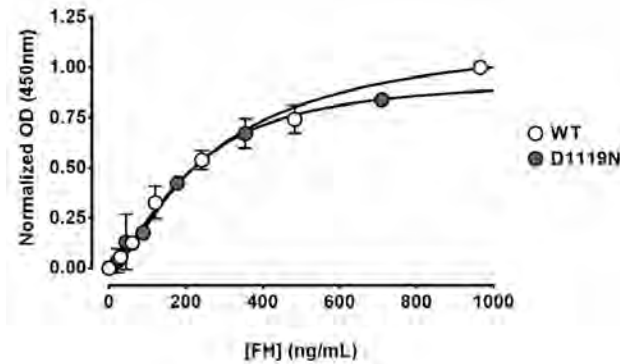

**Binding to C3b**

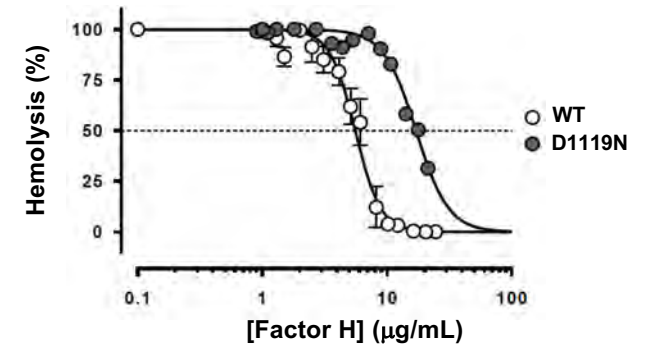

**Hemolytic assay**

**Conclusion: Impaired Function**  
**PATHOGENIC**

**Previous studies:** Pathogenic in Merinero HM, García SP, García-Fernández J, Arjona E, Tortajada A, Rodríguez de Córdoba S. Complete functional characterization of disease-associated genetic variants in the complement factor H gene. *Kidney International*. 2018;93(2):470-481.

**Comments:**

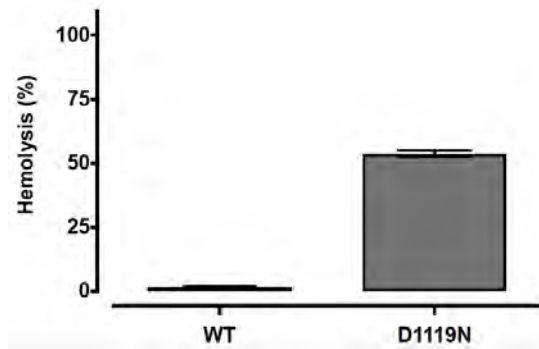

**Cofactor activity**

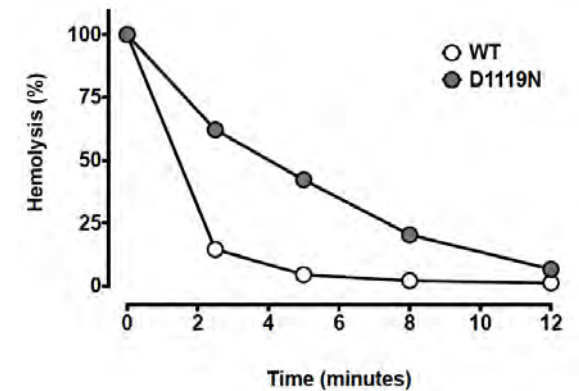

**Decay-accelerating activity**

# c.3356A>G (D1119G)

CADD: 23  
gnomAD:  $4 \times 10^{-6}$

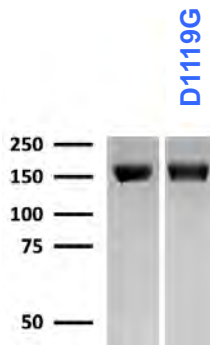

SDS-PAGE  
(Non-reduced)

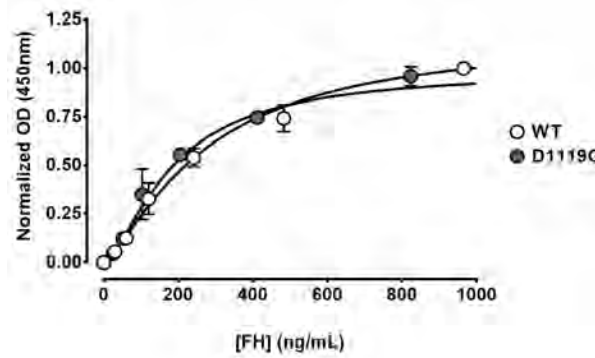

Binding to C3b

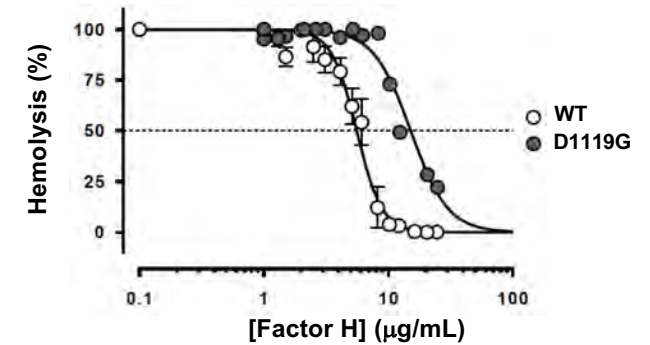

Hemolytic assay

**Conclusion: Impaired Function  
PATHOGENIC**

Previous studies: None

Comments:

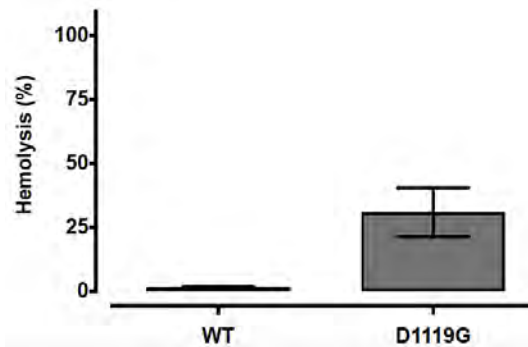

Cofactor activity

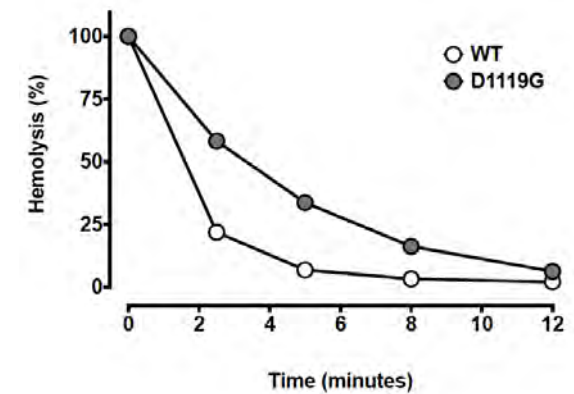

Decay-accelerating activity

# c.3357C>G (D1119E)

CADD: 11.94  
gnomAD:  $1 \times 10^{-5}$

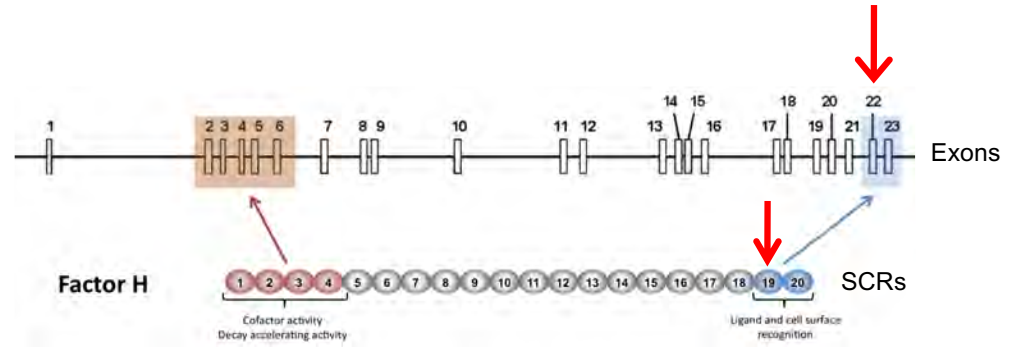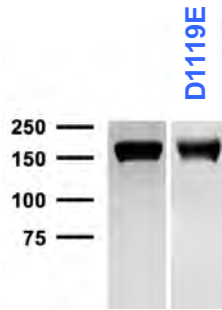

SDS-PAGE  
(Non-reduced)

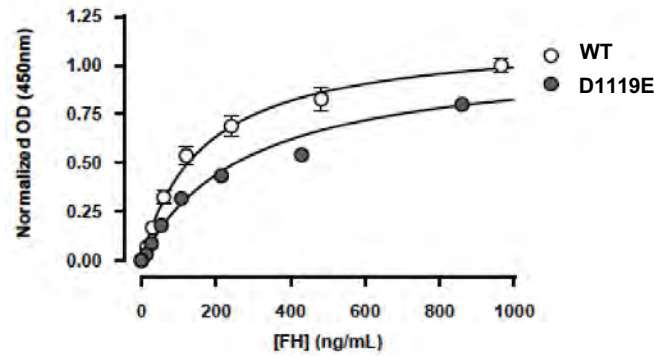

Binding to C3b

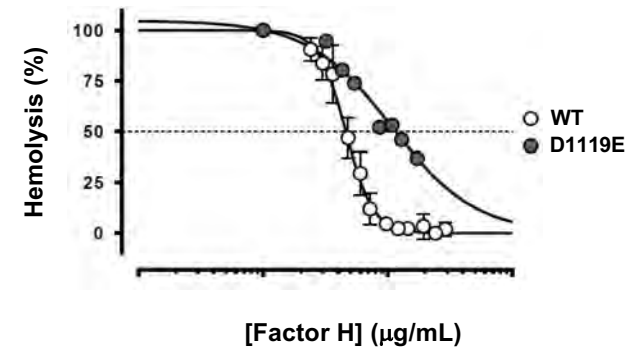

Hemolytic assay

Conclusion: Impaired Function  
PATHOGENIC

Previous studies: None

Comments:

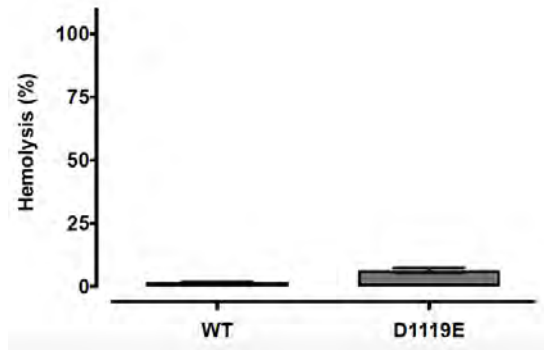

Cofactor activity

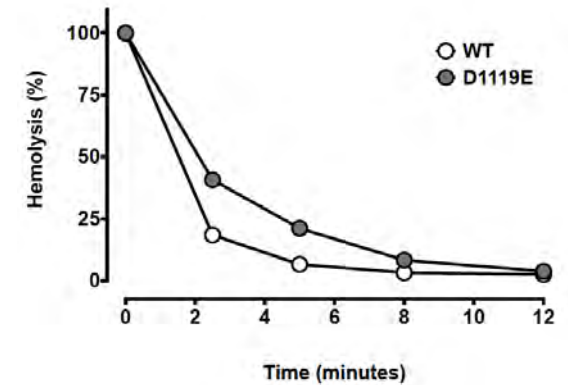

Decay-accelerating activity

# c.3389C>T (P1130L)

CADD: 15.04  
gnomAD: Not present

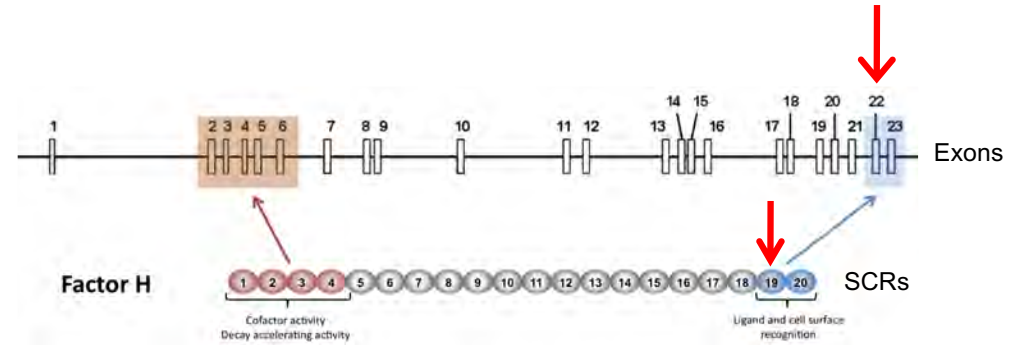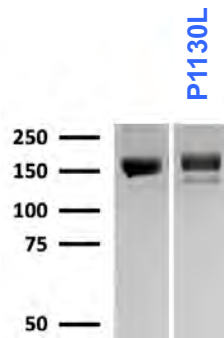

SDS-PAGE  
(Non-reduced)

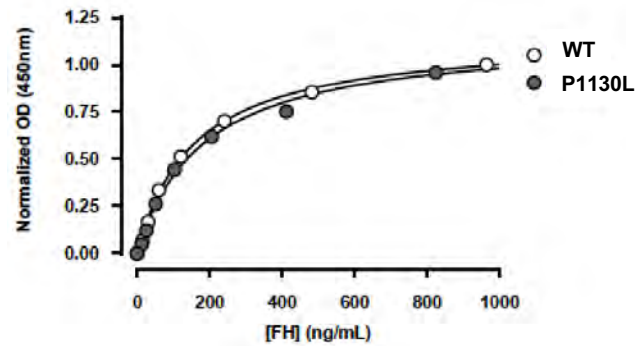

Binding to C3b

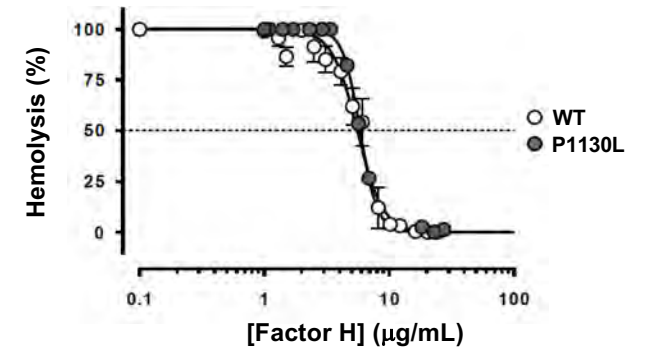

Hemolytic assay

Conclusion: Normal Function  
BENIGN

Previous studies: None

## Comments:

Potential degradation. Proteolytic fragment seen as lower band.

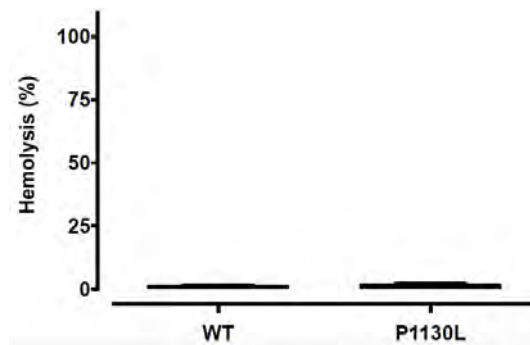

Cofactor activity

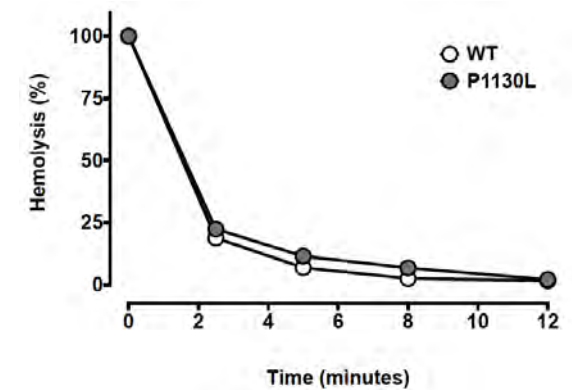

Decay-accelerating activity



# c.3405G>C (E1135D)

CADD: 15.16  
gnomAD:  $4 \times 10^{-6}$

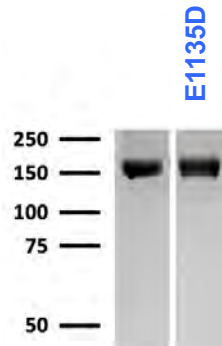

SDS-PAGE  
(Non-reduced)

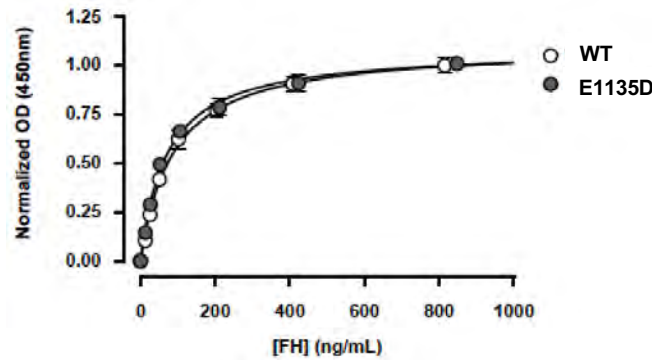

Binding to C3b

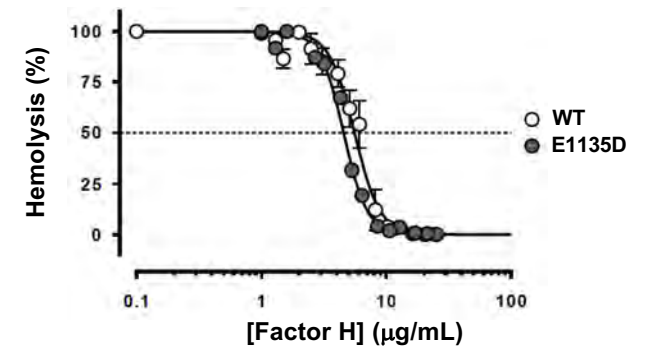

Hemolytic assay

Conclusion: Normal Function  
**BENIGN**

Previous studies: None

Comments:

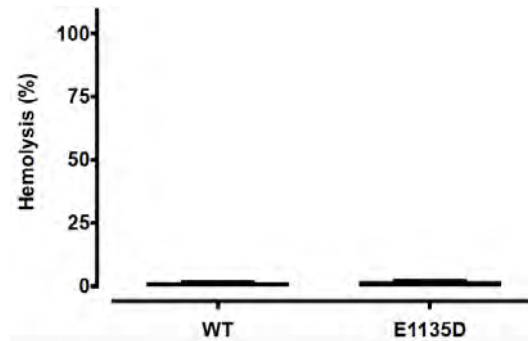

Cofactor activity

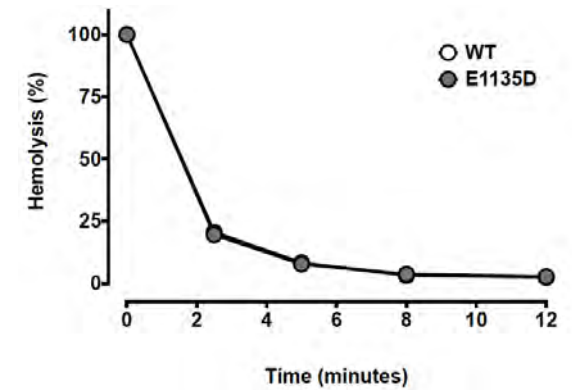

Decay-accelerating activity

# c.3410A>T (Q1137L)

**CADD: 16.39**  
**gnomAD: Not present**

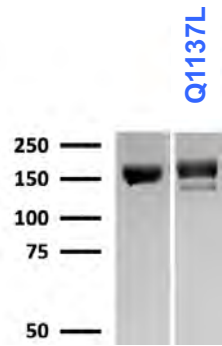

SDS-PAGE  
(Non-reduced)

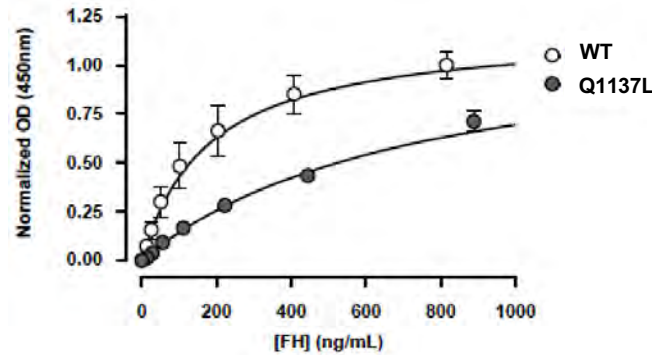

Binding to C3b

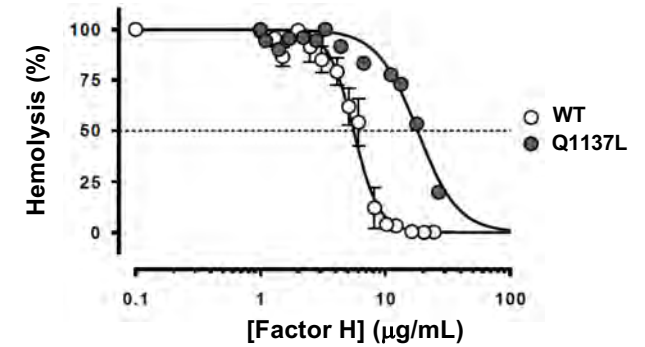

Hemolytic assay

**Conclusion: Impaired Function**  
**PATHOGENIC**

Previous studies: None

**Comments:**

Potential degradation. Proteolytic fragment seen as lower band.

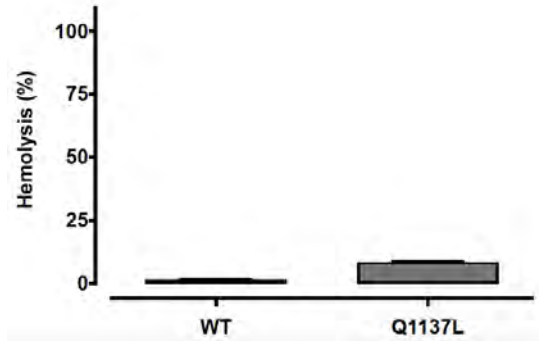

Cofactor activity

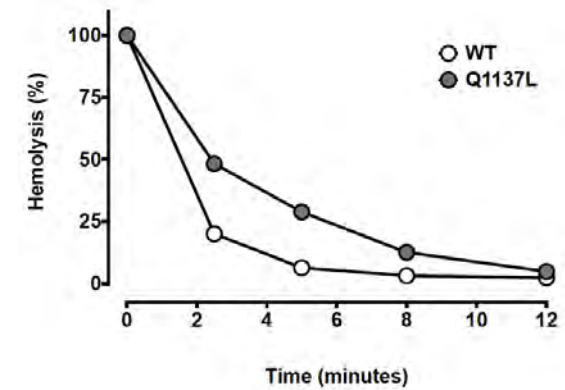

Decay-accelerating activity

# c.3425A>G (Y1142C)

**CADD: 22.1**  
**gnomAD: Not present**

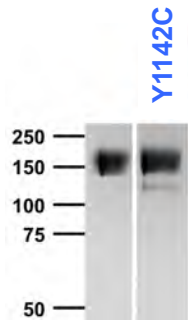

**SDS-PAGE**  
(Non-reduced)

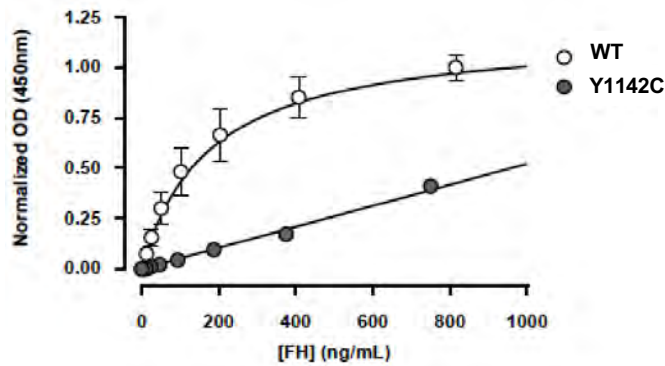

**Binding to C3b**

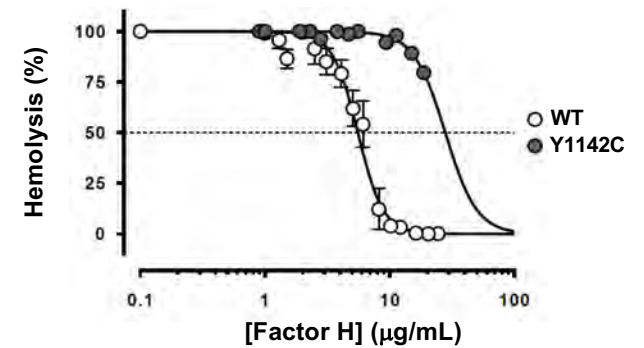

**Hemolytic assay**

**Conclusion: Impaired Function**  
**PATHOGENIC**

Previous studies: None

**Comments:**

Potential degradation. Proteolytic fragment seen as lower band.

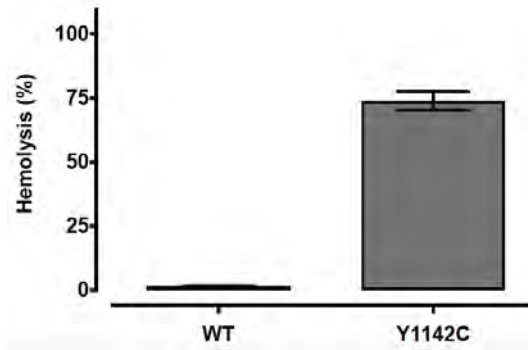

**Cofactor activity**

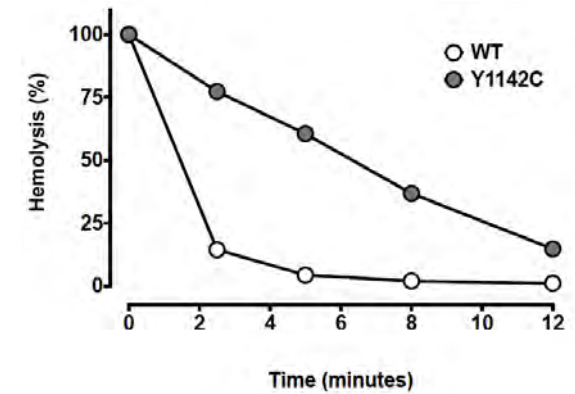

**Decay-accelerating activity**

# c.3427C>G (Q1143E)

CADD: 0  
gnomAD:  $9 \times 10^{-3}$

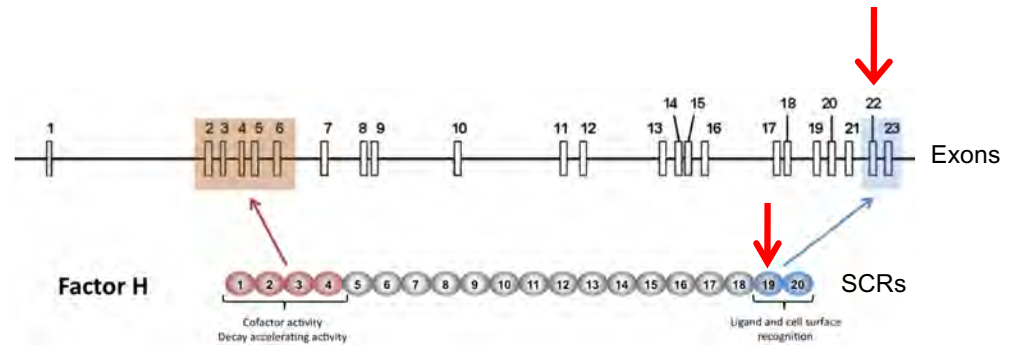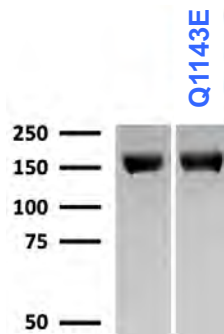

SDS-PAGE  
(Non-reduced)

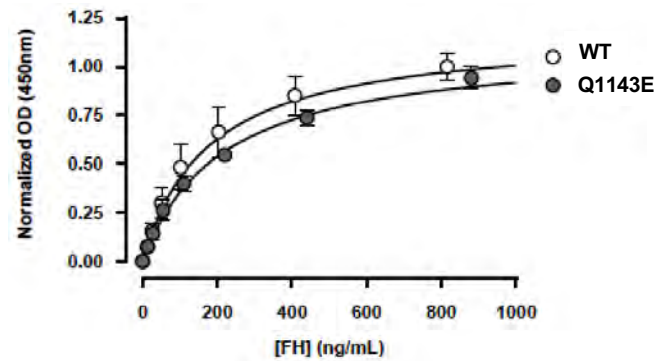

Binding to C3b

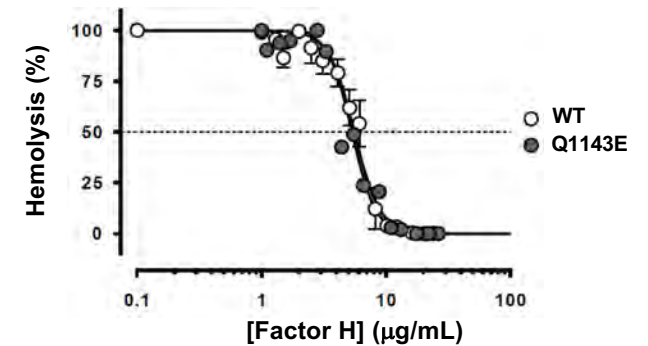

Hemolytic assay

Conclusion: Normal Function  
BENIGN

Previous studies: None

Comments:

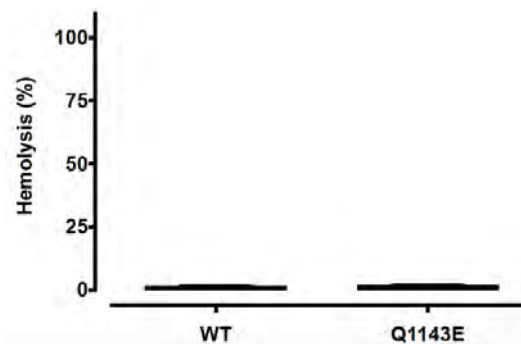

Cofactor activity

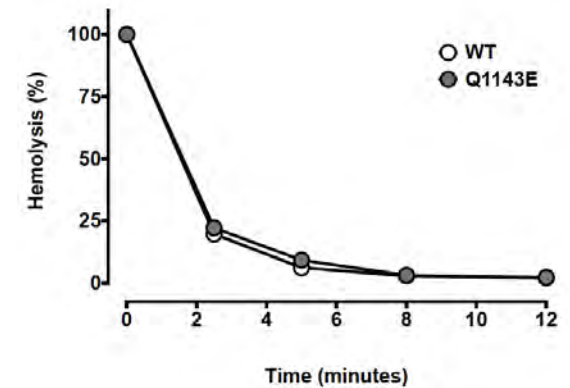

Decay-accelerating activity

# c.3481C>A (P1161T)

**CADD: 23.6**  
**gnomAD: Not present**

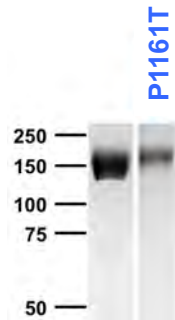

SDS-PAGE  
(Non-reduced)

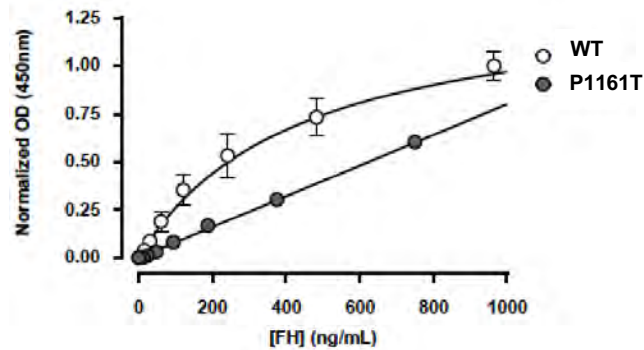

Binding to C3b

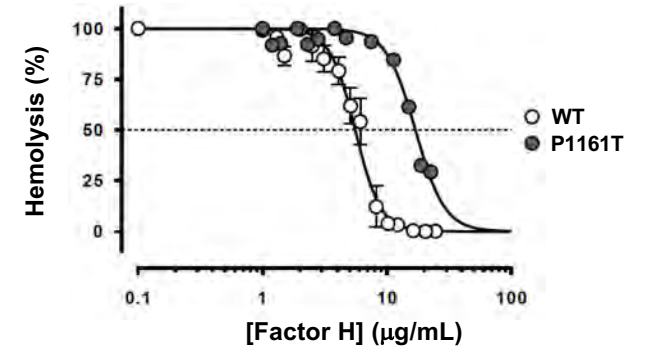

Hemolytic assay

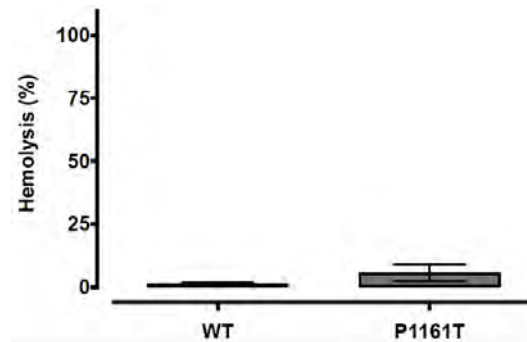

Cofactor activity

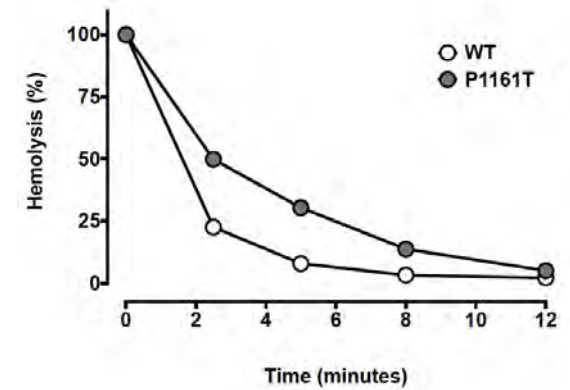

Decay-accelerating activity

**Conclusion: Impaired Expression**  
**PATHOGENIC**

Previous studies: None

**Comments:**

SDS-PAGE shows a weak FH band under non-reducing conditions, suggesting that this variant likely affects expression of the protein and results in a factor H deficiency.

# c.3497C>T (P1166L)

**CADD: 13.96**  
**gnomAD: Not present**

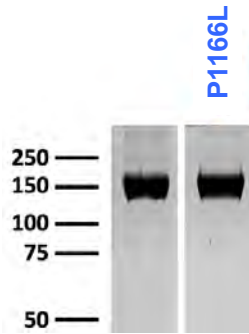

**SDS-PAGE**  
(Non-reduced)

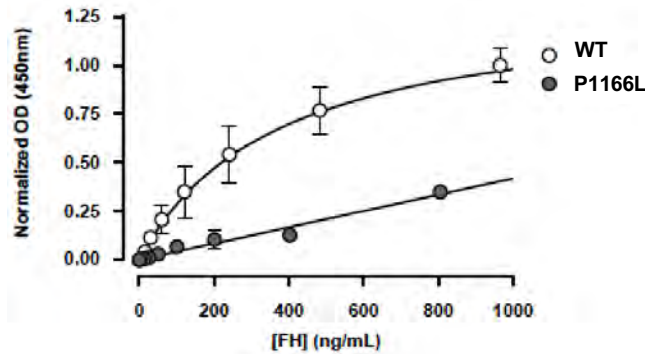

**Binding to C3b**

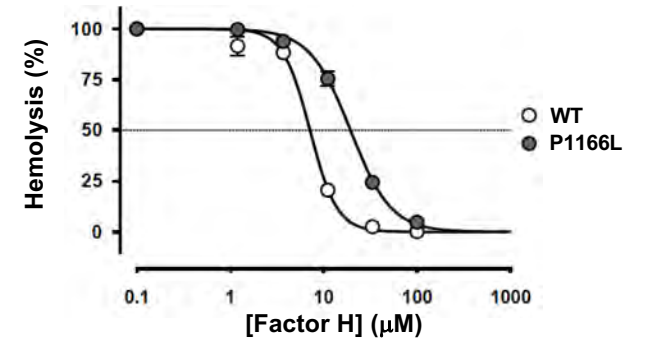

**Hemolytic assay**

**Conclusion: Impaired Function**  
**PATHOGENIC**

**Previous studies:** Pathogenic in Merinero HM, García SP, García-Fernández J, Arjona E, Tortajada A, Rodríguez de Córdoba S. Complete functional characterization of disease-associated genetic variants in the complement factor H gene. *Kidney International*. 2018;93(2):470-481.

**Comments:**

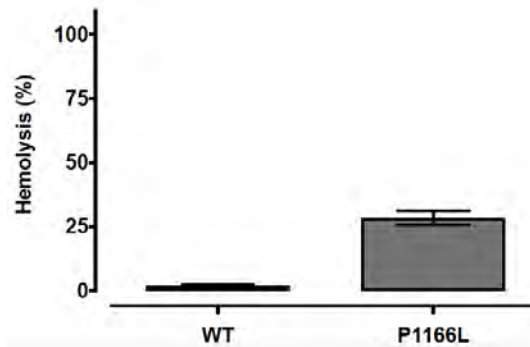

**Cofactor activity**

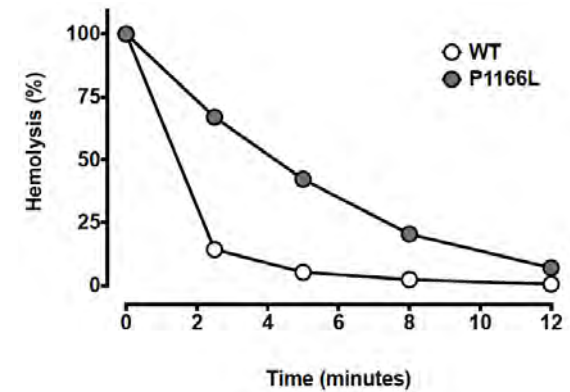

**Decay-accelerating activity**

# c.3505A>C (I1169L)

**CADD: 15.43**  
**gnomAD: Not present**

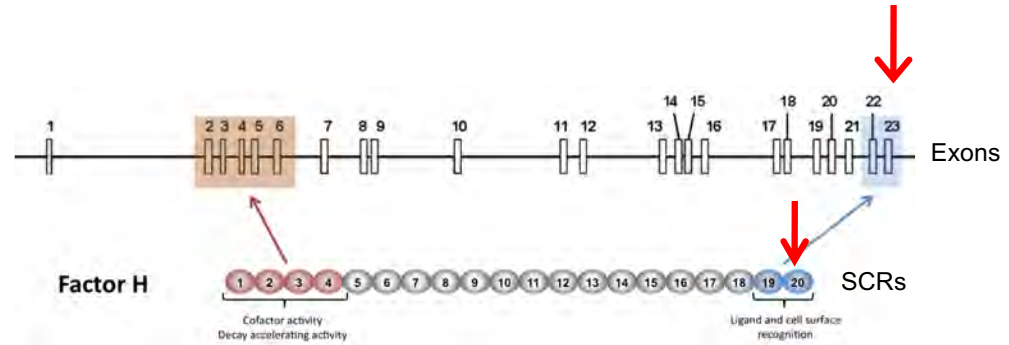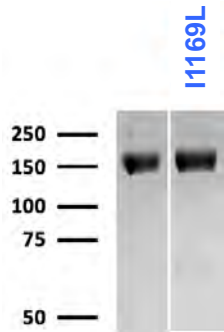

SDS-PAGE  
(Non-reduced)

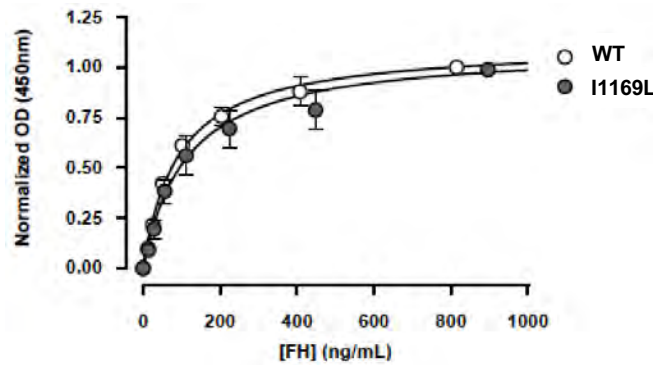

Binding to C3b

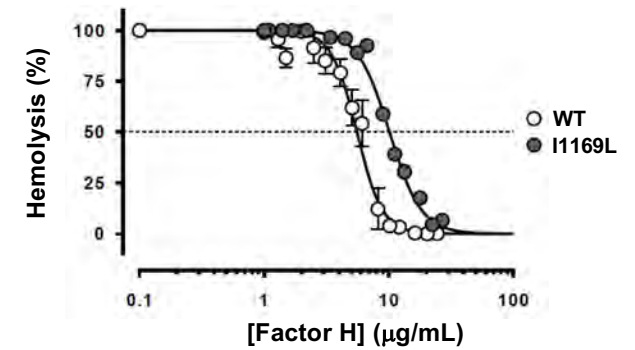

Hemolytic assay

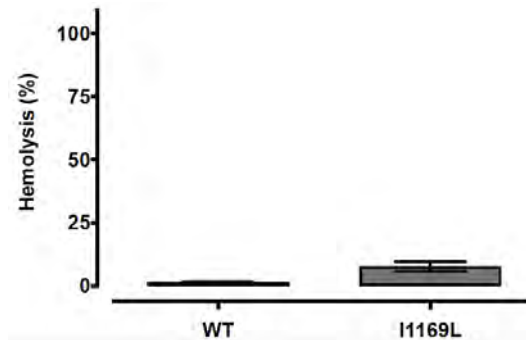

Cofactor activity

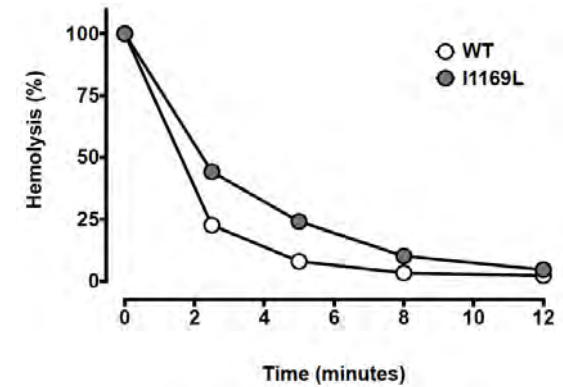

Decay-accelerating activity

**Conclusion: Impaired Function**  
**PATHOGENIC**

Previous studies: None

Comments:

# c.3530A>G (I1177C)

**CADD: 22.8**  
**gnomAD: Not present**

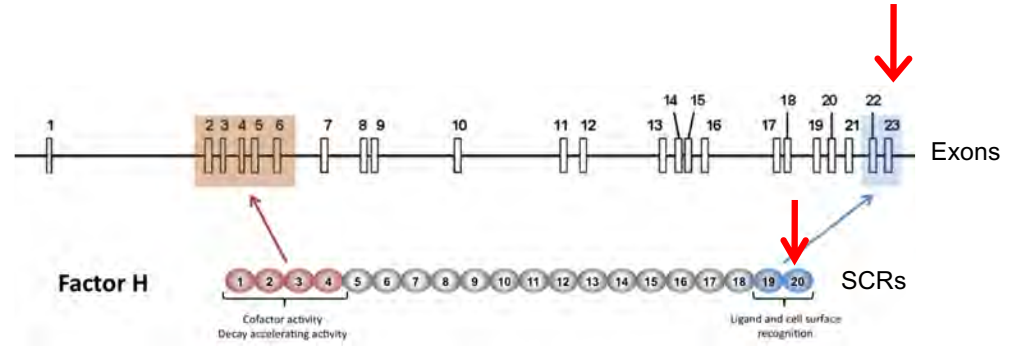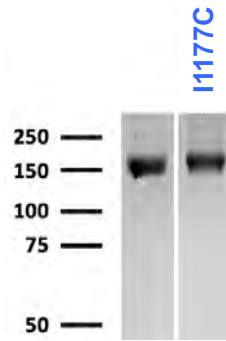

SDS-PAGE  
(Non-reduced)

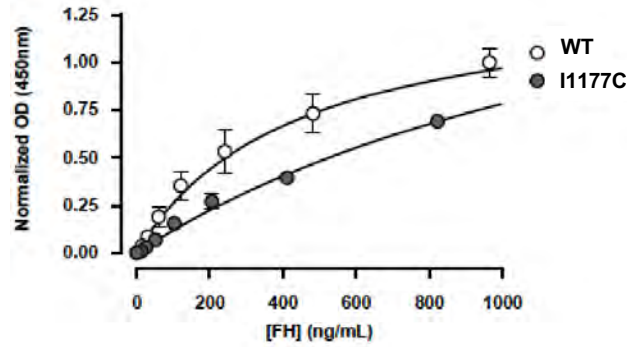

Binding to C3b

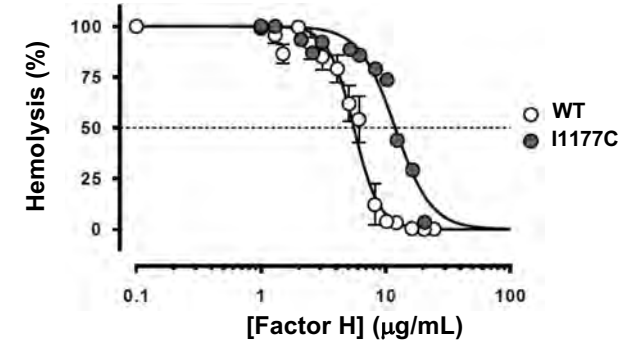

Hemolytic assay

**Conclusion: Impaired Function**  
**PATHOGENIC**

Previous studies: None

Comments:

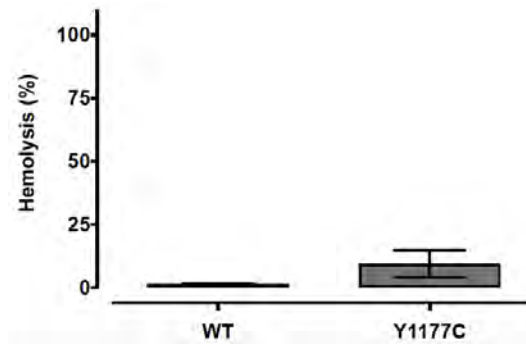

Cofactor activity

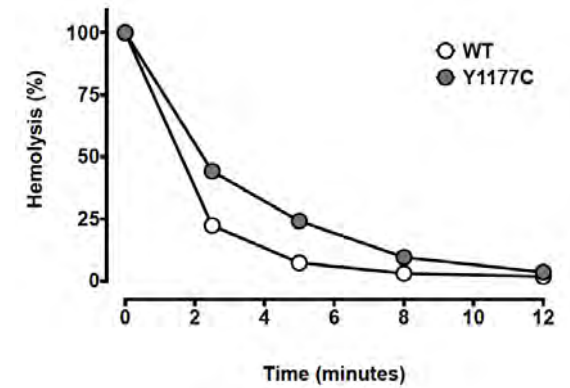

Decay-accelerating activity



# c.3549G>T (W1183C)

**CADD: 22.5**  
**gnomAD: Not present**

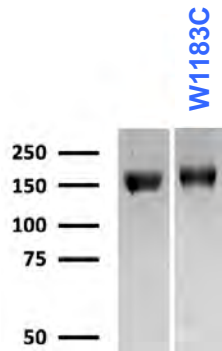

SDS-PAGE  
(Non-reduced)

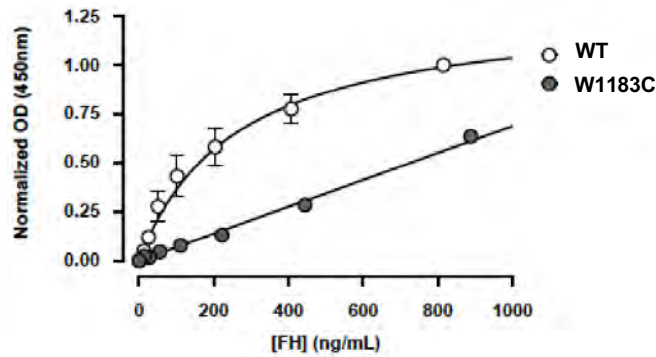

Binding to C3b

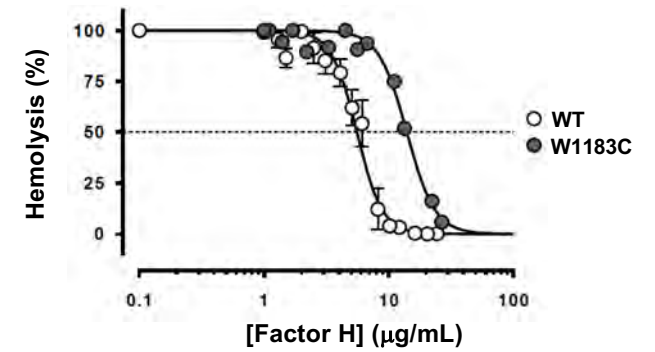

Hemolytic assay

**Conclusion: Impaired Function**  
**PATHOGENIC**

Previous studies: None

Comments:

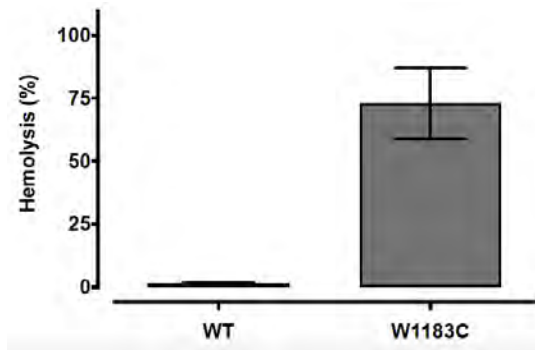

Cofactor activity

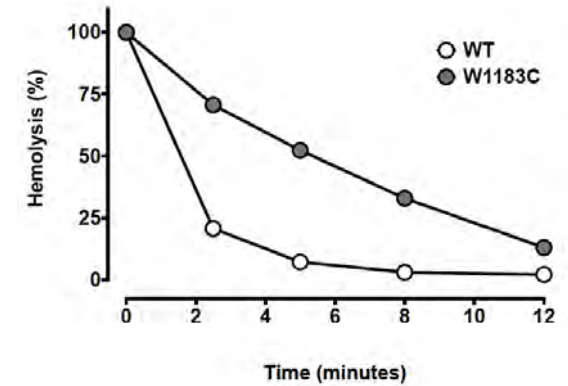

Decay-accelerating activity

# c.3547T>A (W1183R)

**CADD: 19.26**  
**gnomAD: Not present**

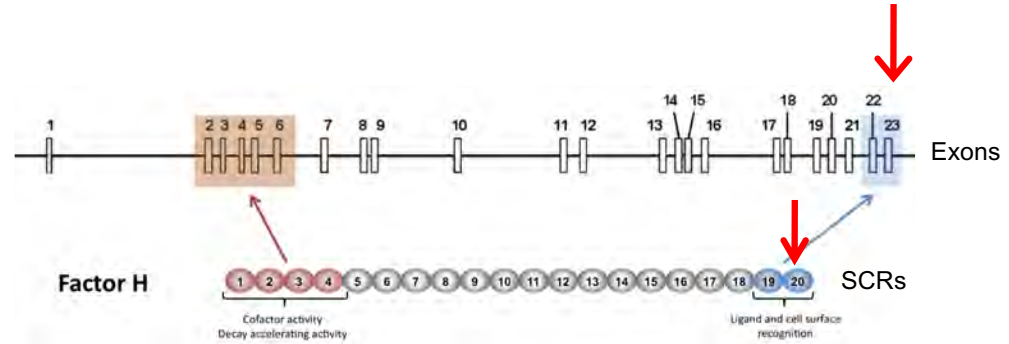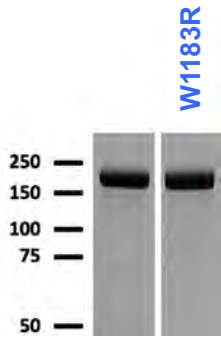

SDS-PAGE  
(Non-reduced)

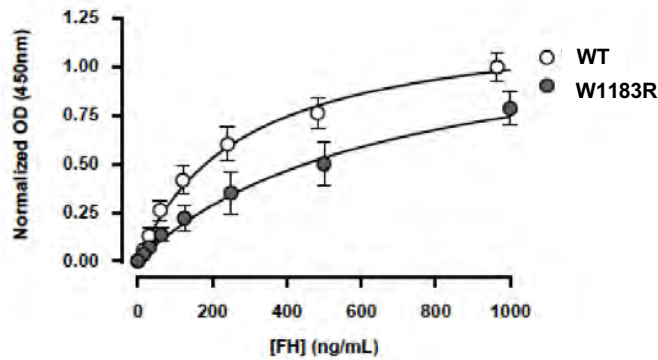

Binding to C3b

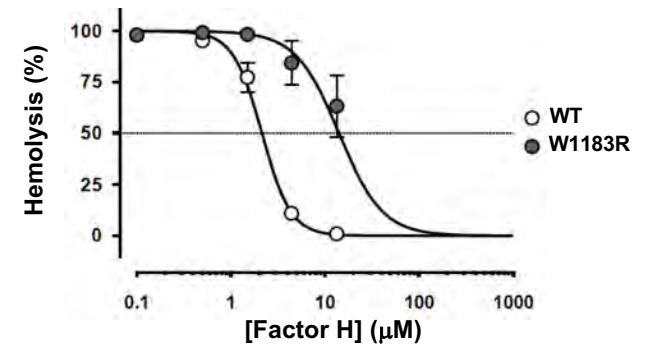

Hemolytic assay

**Conclusion: Impaired Function**  
**PATHOGENIC**

Previous studies: None

Comments:

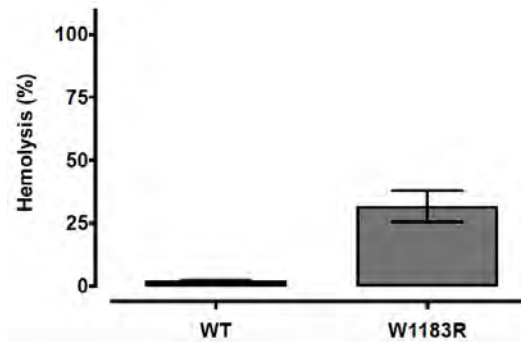

Cofactor activity

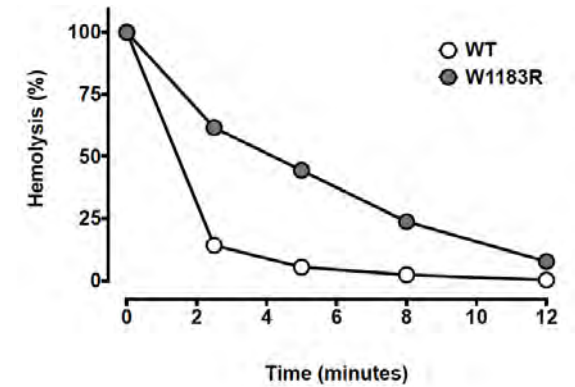

Decay-accelerating activity

# c.3550A>G (T1184A)

**CADD: 0.5**  
**gnomAD: Not present**

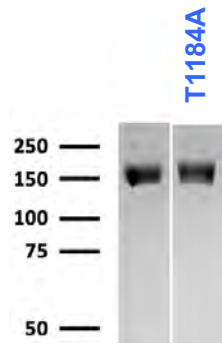

SDS-PAGE  
(Non-reduced)

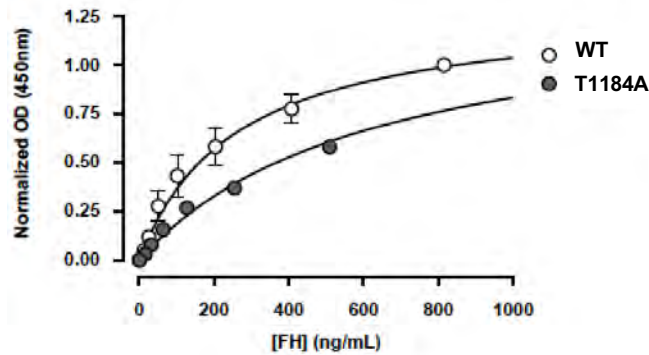

Binding to C3b

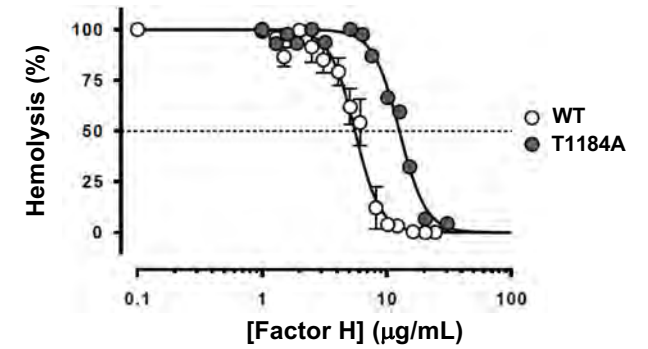

Hemolytic assay

**Conclusion: Impaired Function**  
**PATHOGENIC**

Previous studies: None

Comments:

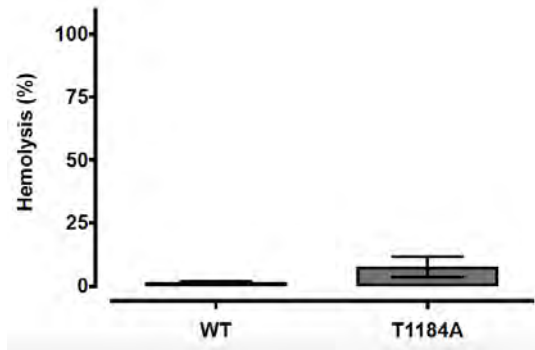

Cofactor activity

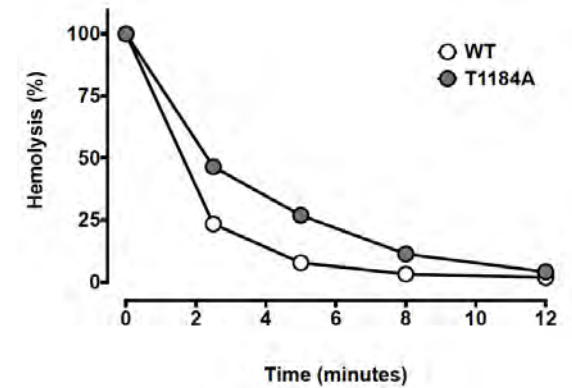

Decay-accelerating activity

# c.3550A>C (T1184P)

**CADD: 1.49**  
**gnomAD: Not present**

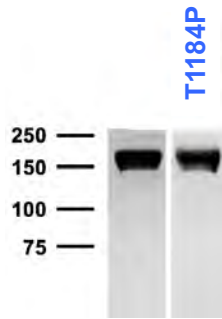

SDS-PAGE  
(Non-reduced)

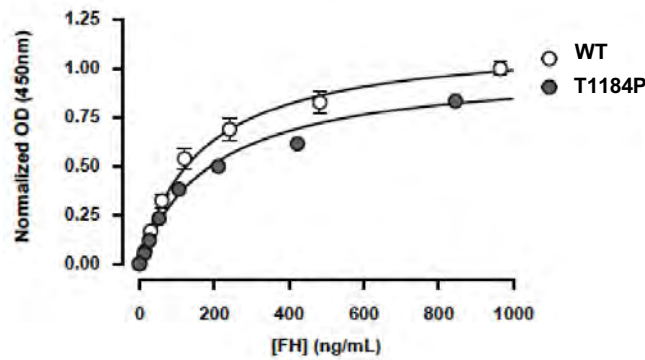

Binding to C3b

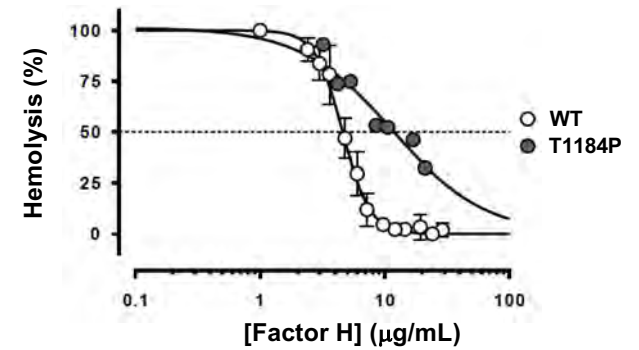

Hemolytic assay

**Conclusion: Impaired Function**  
**PATHOGENIC**

Previous studies: None

Comments:

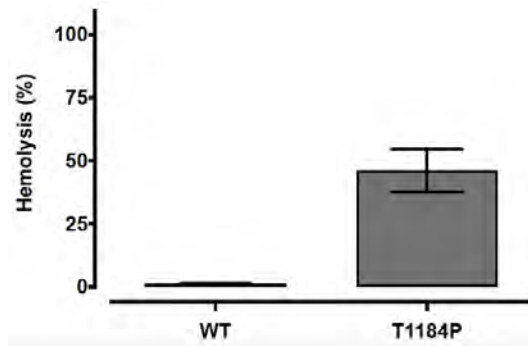

Cofactor activity

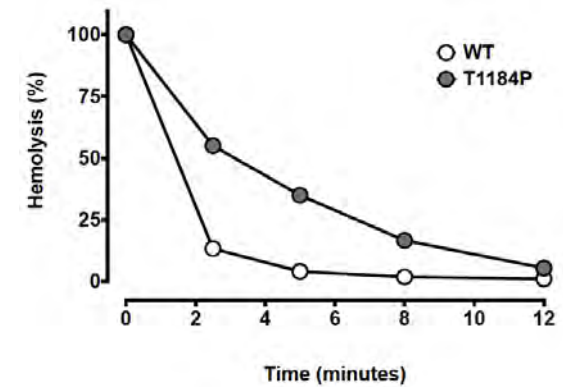

Decay-accelerating activity

# c.3551C>G (T1184R)

CADD: 0  
gnomAD: Not present

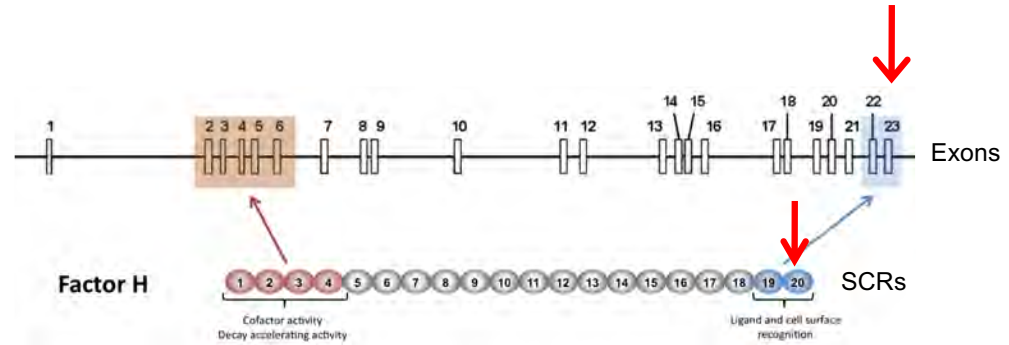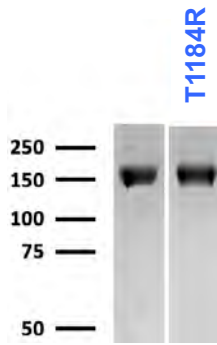

SDS-PAGE  
(Non-reduced)

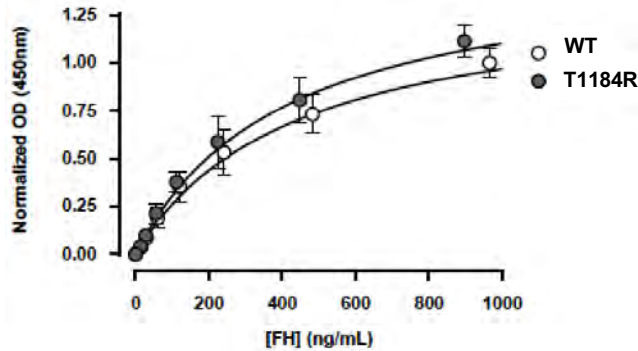

Binding to C3b

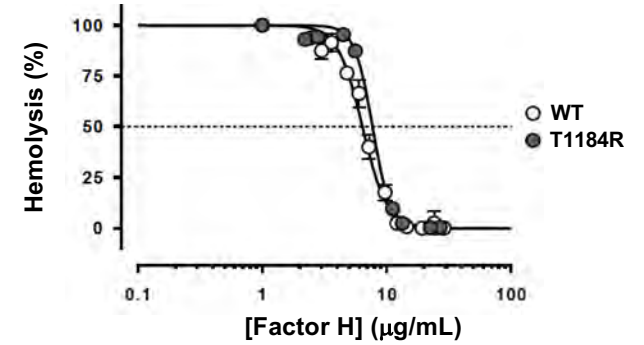

Hemolytic assay

Conclusion: Normal Function  
BENIGN

Previous studies: None

Comments:

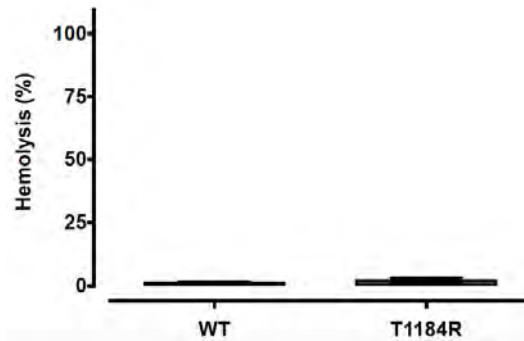

Cofactor activity

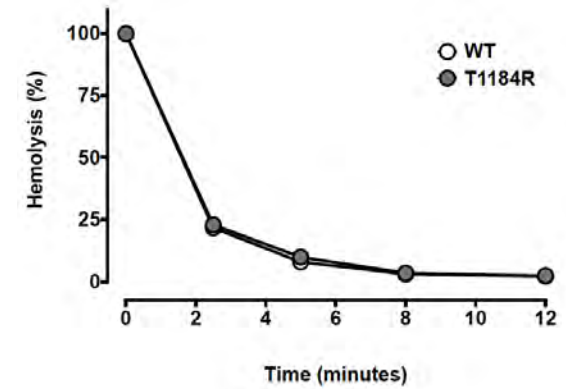

Decay-accelerating activity

# c.3557A>C (K1186T)

**CADD: 0.26**  
**gnomAD:  $4 \times 10^{-6}$**

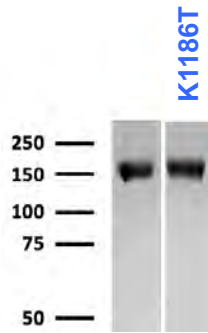

SDS-PAGE  
(Non-reduced)

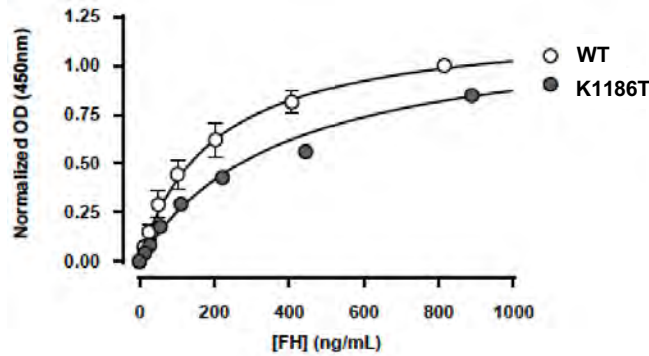

Binding to C3b

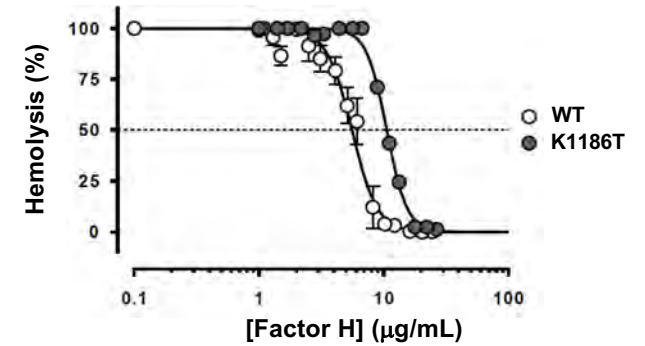

Hemolytic assay

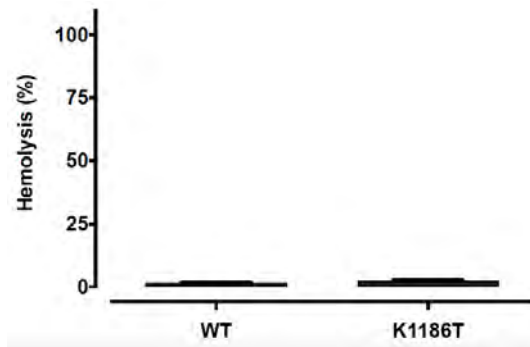

Cofactor activity

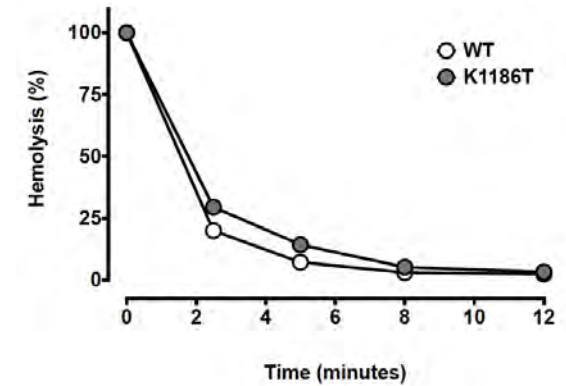

Decay-accelerating activity

**Conclusion: Impaired Function**  
**PATHOGENIC**

Previous studies: None

Comments:

# c.3566T>C (L1189P)

**CADD: 15.81**  
**gnomAD: Not present**

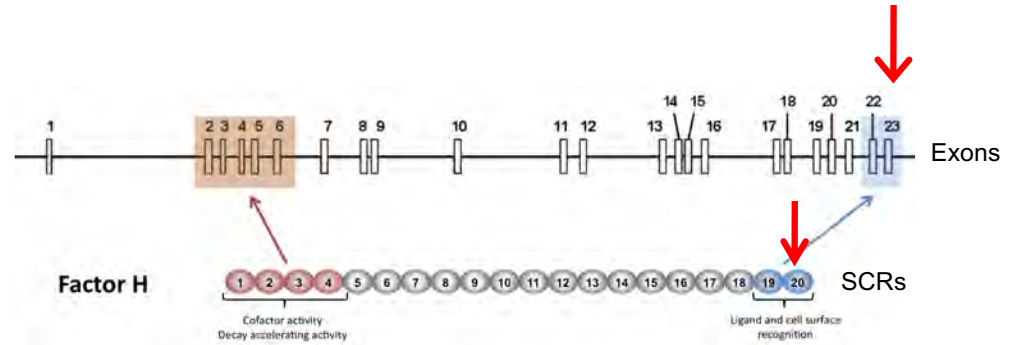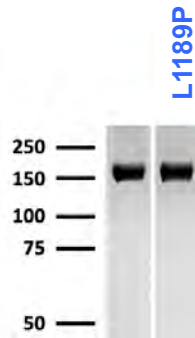

SDS-PAGE  
(Non-reduced)

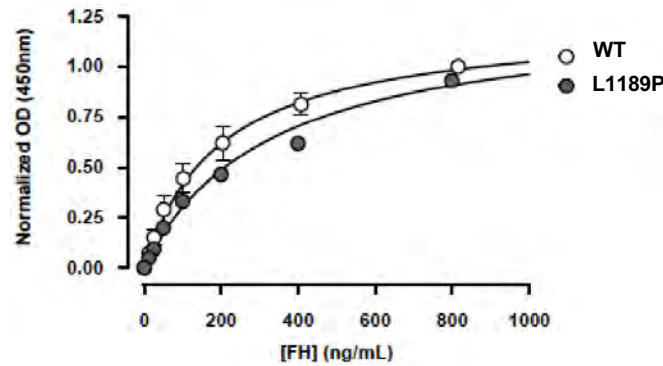

Binding to C3b

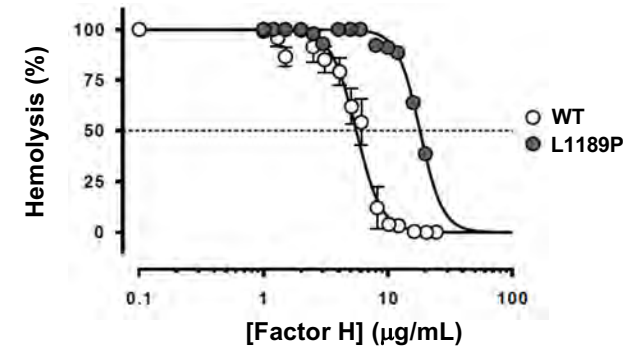

Hemolytic assay

**Conclusion: Impaired Function**  
**PATHOGENIC**

Previous studies: None

Comments:

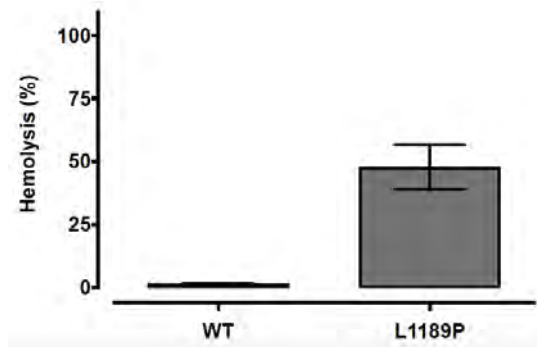

Cofactor activity

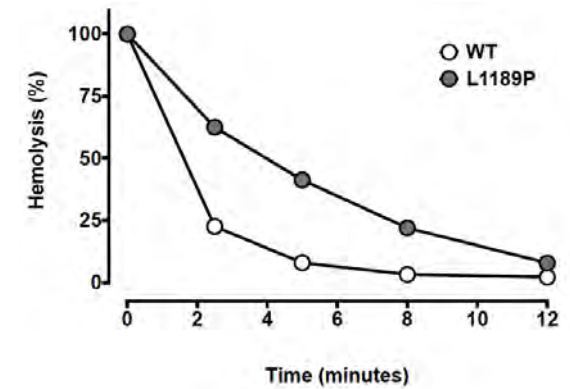

Decay-accelerating activity

# c.3566T>A (L1189H)

**CADD: 20.3**  
**gnomAD: Not present**

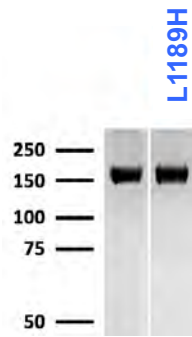

SDS-PAGE  
(Non-reduced)

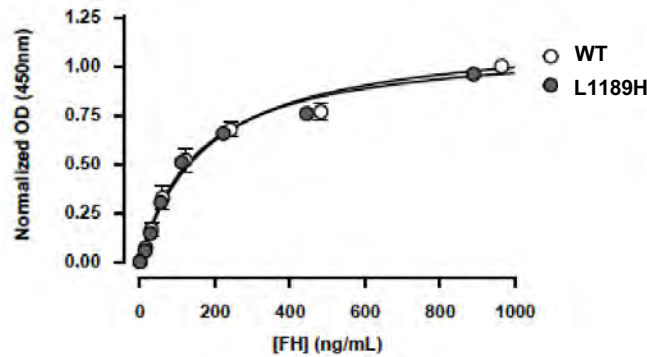

Binding to C3b

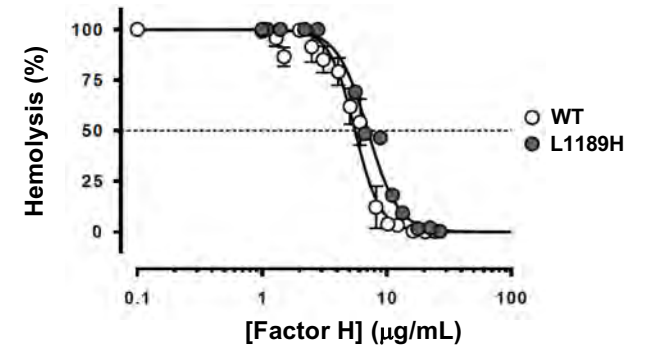

Hemolytic assay

**Conclusion: Impaired Function**  
**PATHOGENIC**

Previous studies: None

Comments:

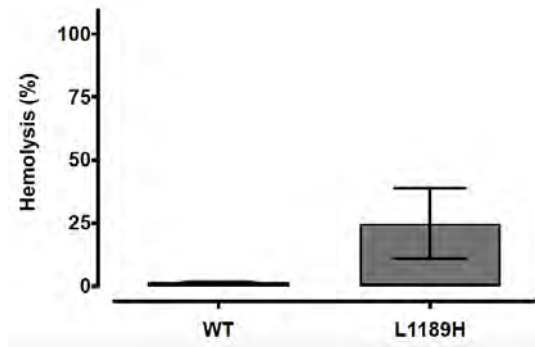

Cofactor activity

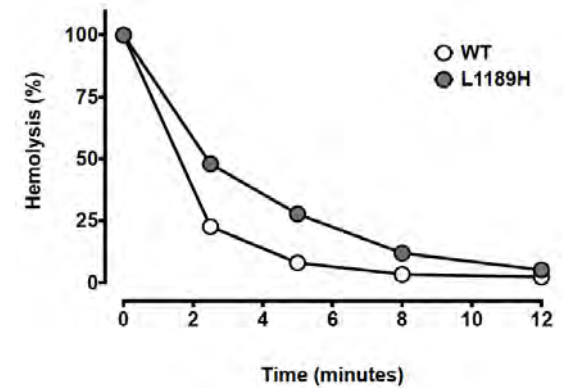

Decay-accelerating activity



# c.3572C>G (S1191W)

**CADD: 17.31**  
**gnomAD: Not present**

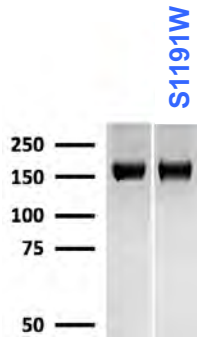

SDS-PAGE  
(Non-reduced)

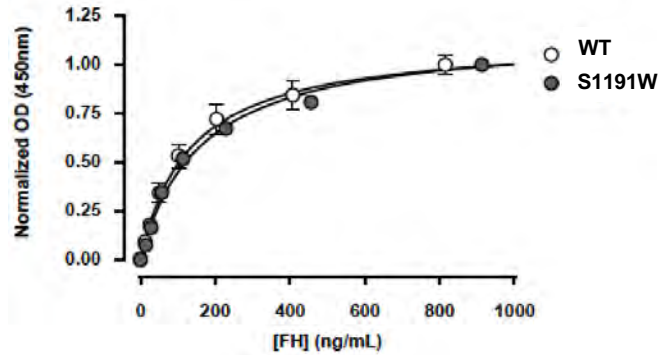

Binding to C3b

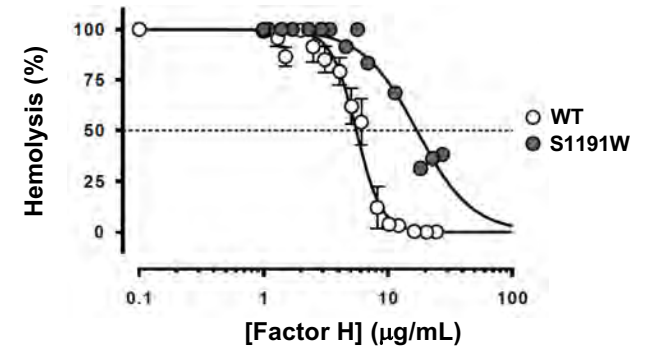

Hemolytic assay

**Conclusion: Impaired Function**  
**PATHOGENIC**

Previous studies: None

Comments:

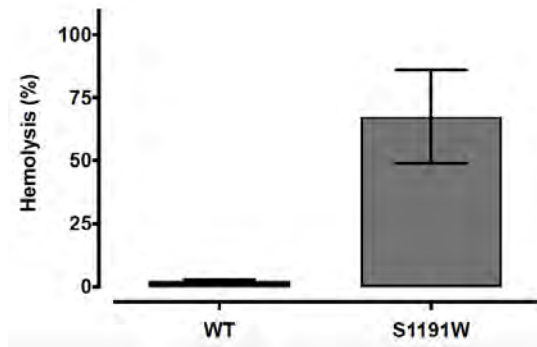

Cofactor activity

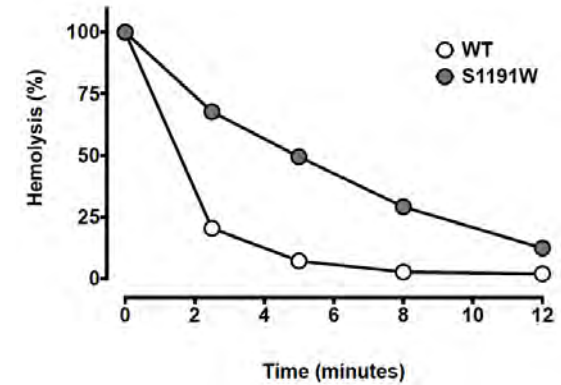

Decay-accelerating activity

# c.3572C>T (S1191L)

**CADD: 12.98**  
**gnomAD: Not present**

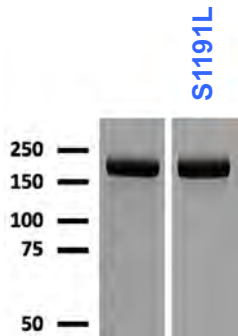

**SDS-PAGE**  
(Non-reduced)

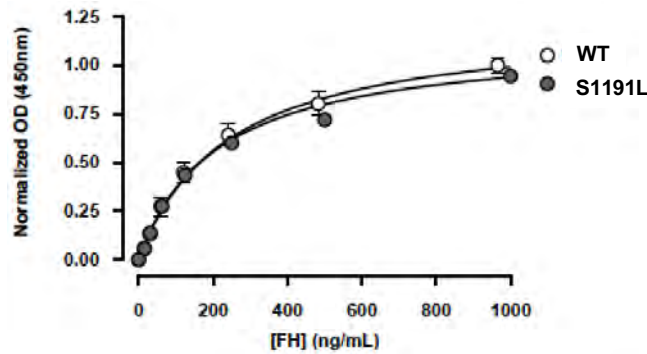

**Binding to C3b**

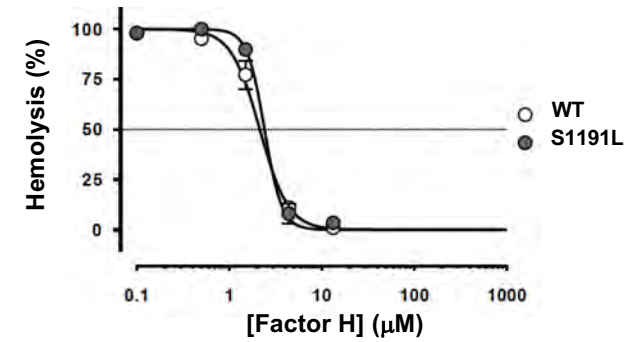

**Hemolytic assay**

**Conclusion: Impaired Function**  
**PATHOGENIC**

**Previous studies:** Pathogenic in Heinen S, Sanchez-Corral P, Jackson MS, et al. De novo gene conversion in the RCA gene cluster (1q32) causes mutations in complement factor H associated with atypical hemolytic uremic syndrome. *Human Mutation*. 2006;27(3):292-293.

**Comments:**

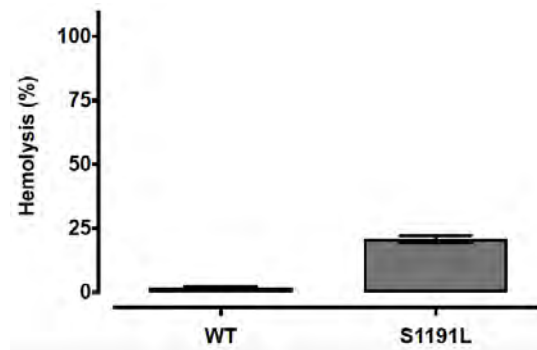

**Cofactor activity**

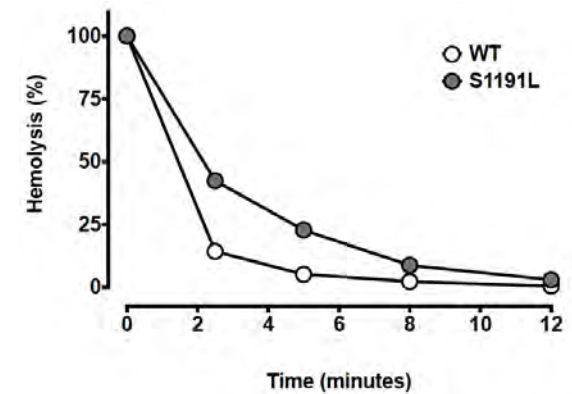

**Decay-accelerating activity**

# c.3581G>A (G1194D)

CADD: 15.28  
gnomAD:  $1 \times 10^{-5}$

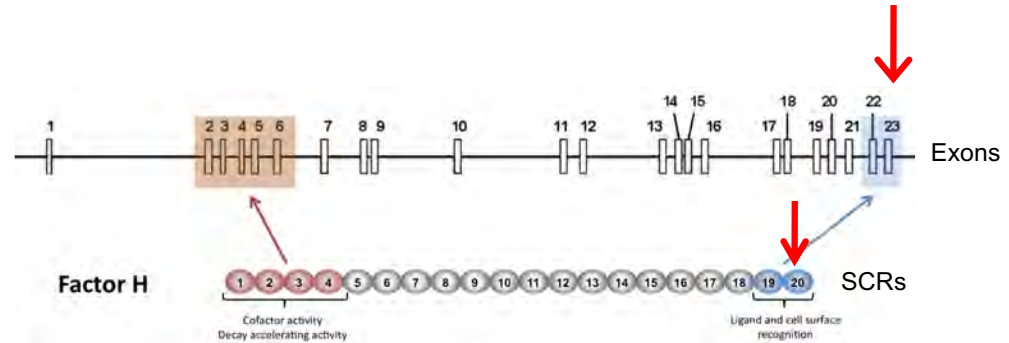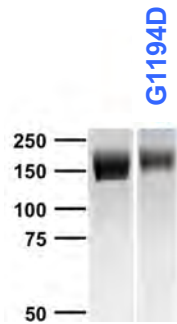

SDS-PAGE  
(Non-reduced)

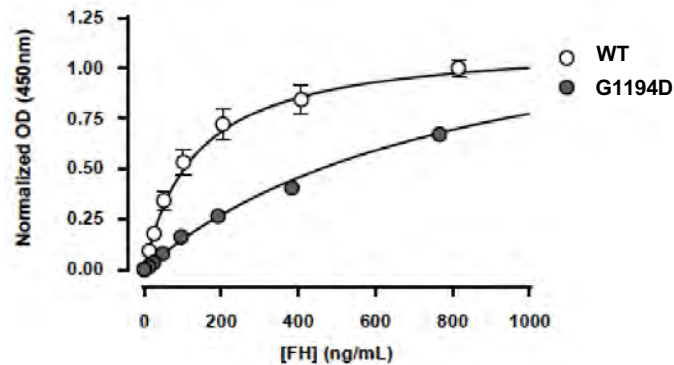

Binding to C3b

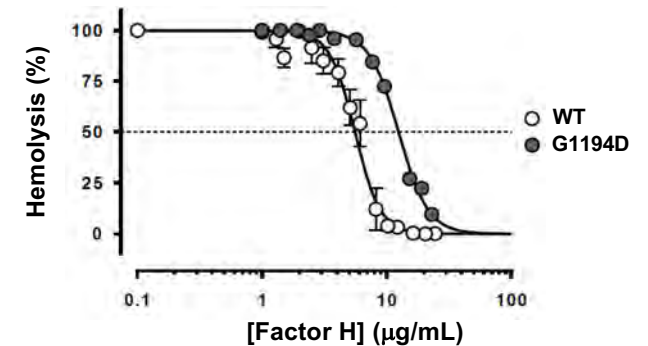

Hemolytic assay

**Conclusion:** Impaired Expression  
**PATHOGENIC**

Previous studies: None

**Comments:**

SDS-PAGE shows a FH band with diminished intensity under non-reducing conditions, suggesting that this variant likely affects expression of the protein and results in a factor H deficiency.

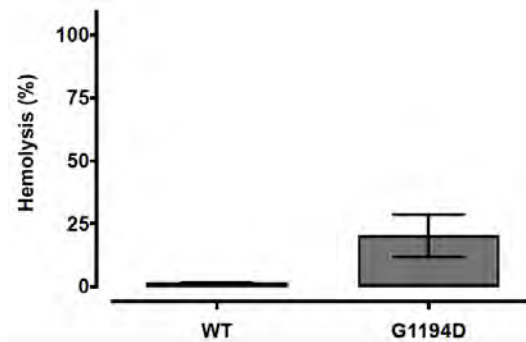

Cofactor activity

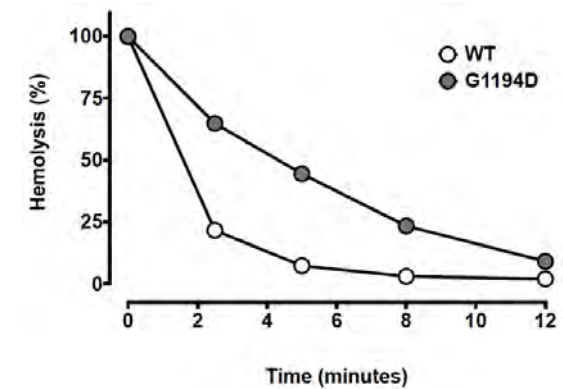

Decay-accelerating activity

# c.3593A>T (E1198V)

**CADD: 22.3**  
**gnomAD: Not present**

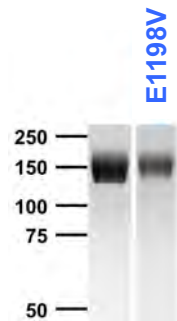

**SDS-PAGE**  
(Non-reduced)

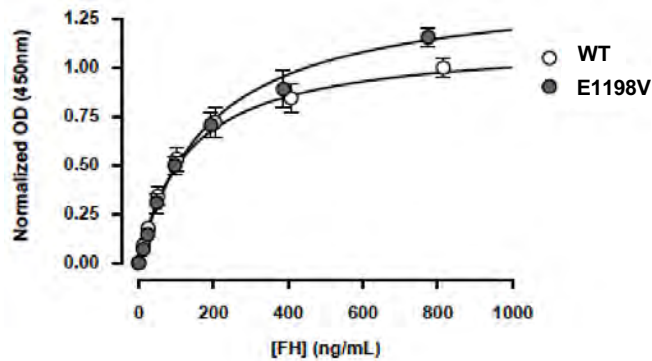

**Binding to C3b**

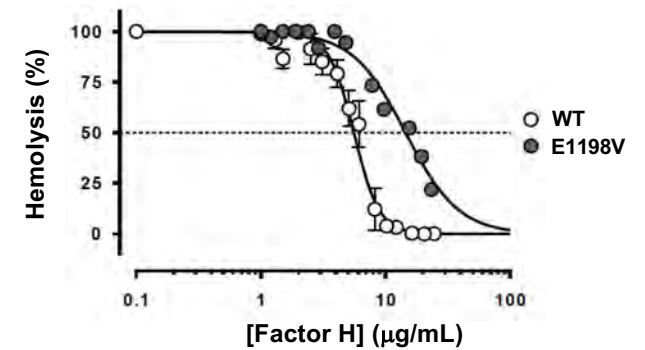

**Hemolytic assay**

**Conclusion: Impaired Expression**  
**PATHOGENIC**

Previous studies: None

**Comments:**

SDS-PAGE shows a FH band with diminished intensity under non-reducing conditions, suggesting that this variant likely affects expression of the protein and results in a factor H deficiency.

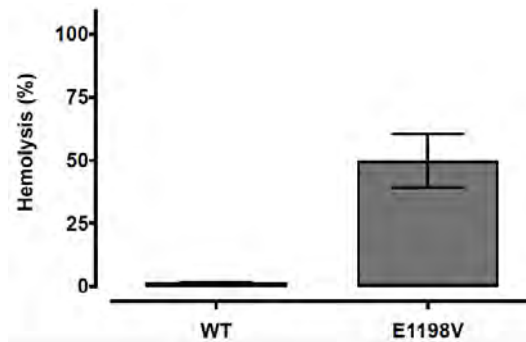

**Cofactor activity**

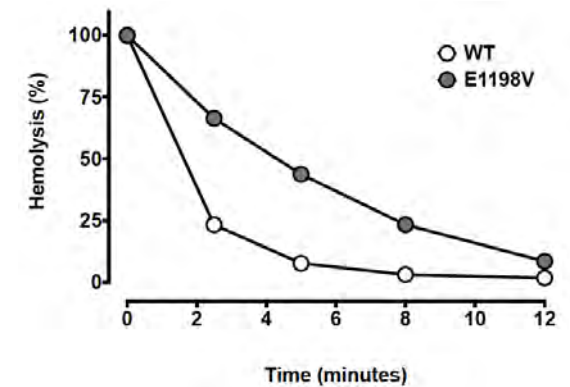

**Decay-accelerating activity**

# c.3598G>T (V1200L)

CADD: 0  
gnomAD: Not present

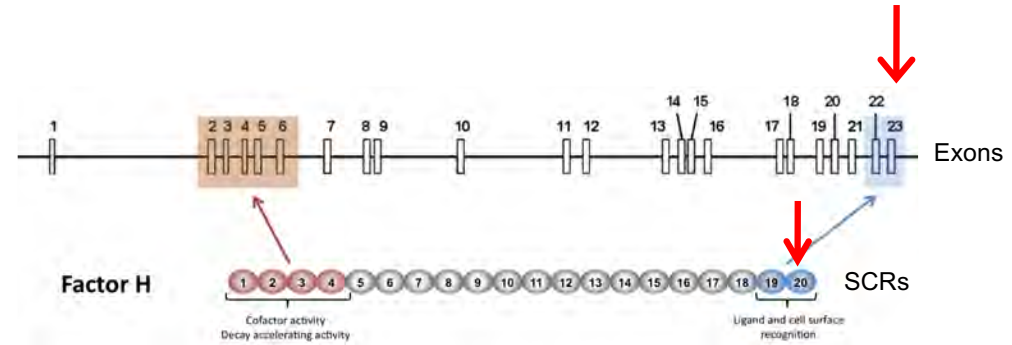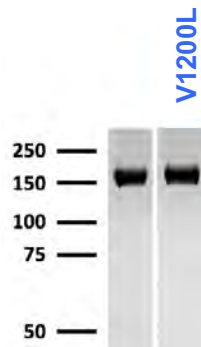

SDS-PAGE  
(Non-reduced)

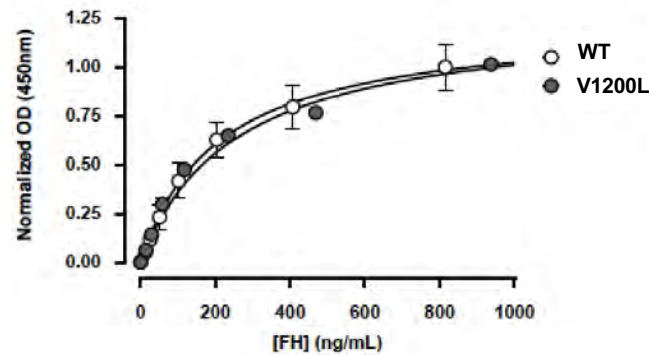

Binding to C3b

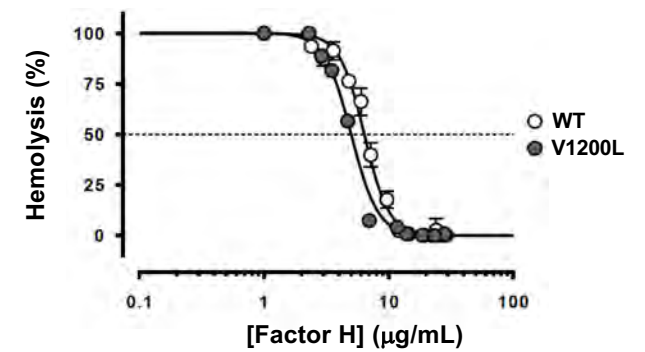

Hemolytic assay

Conclusion: Normal Function  
BENIGN

Previous studies: None

Comments:

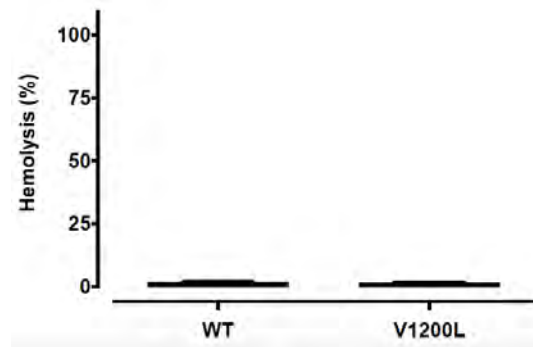

Cofactor activity

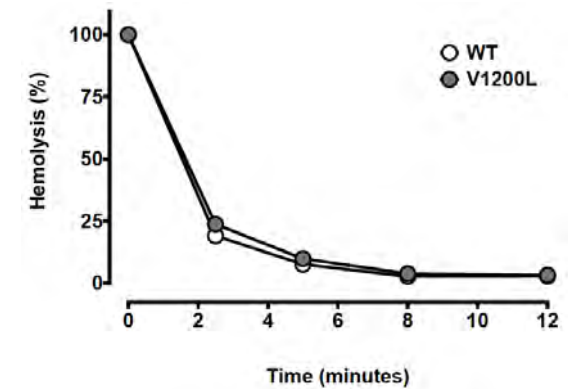

Decay-accelerating activity

# c.3607C>T (R1203W)

CADD: 0  
gnomAD:  $4 \times 10^{-5}$

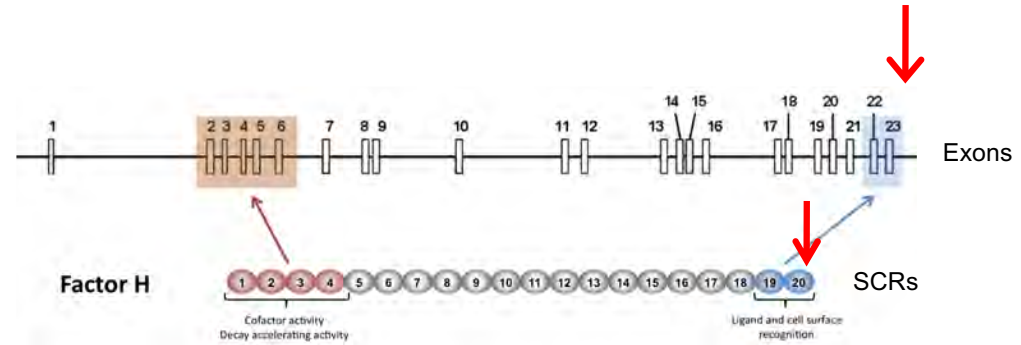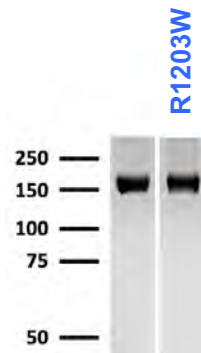

SDS-PAGE  
(Non-reduced)

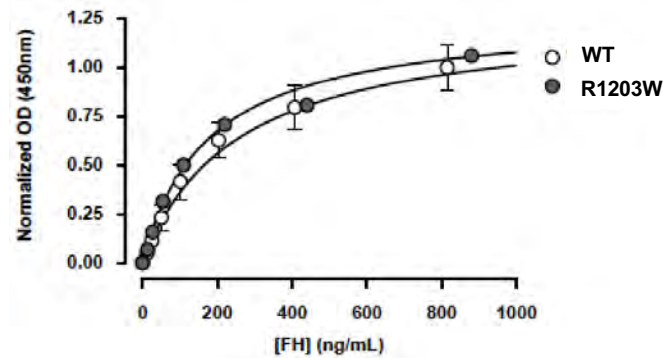

Binding to C3b

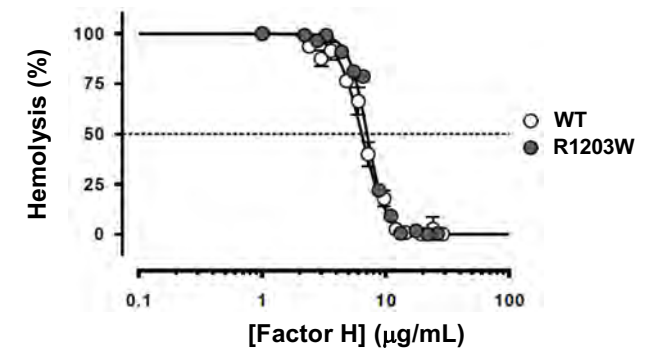

Hemolytic assay

Conclusion: Normal Function  
**BENIGN**

Previous studies: None

Comments:

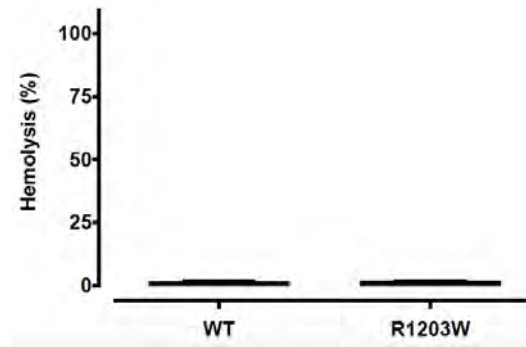

Cofactor activity

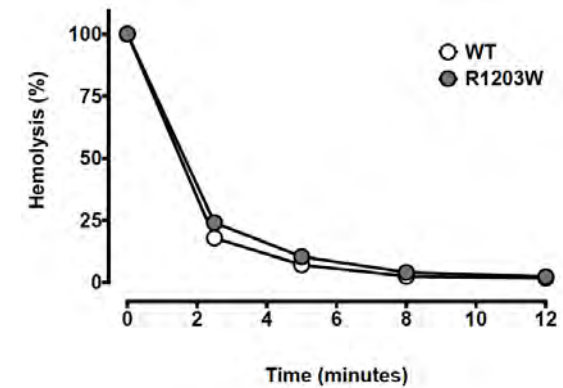

Decay-accelerating activity

# c.3616C>T (R1206C)

**CADD: 0.14**  
**gnomAD: Not present**

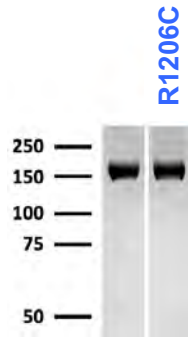

SDS-PAGE  
(Non-reduced)

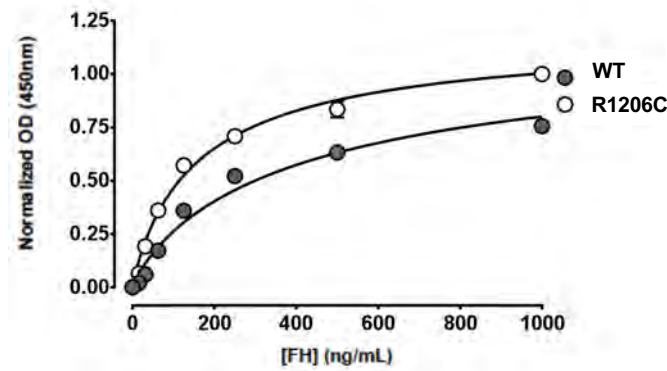

Binding to C3b

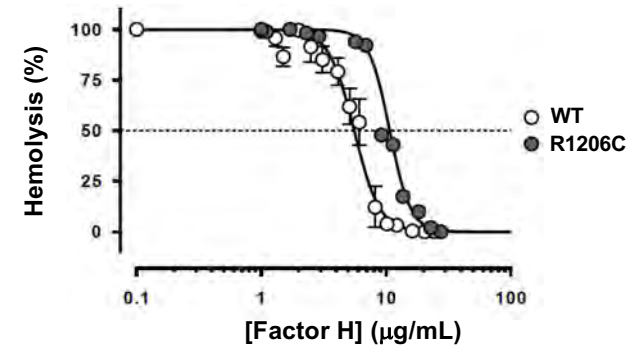

Hemolytic assay

**Conclusion: Impaired Function**  
**PATHOGENIC**

Previous studies: None

Comments:

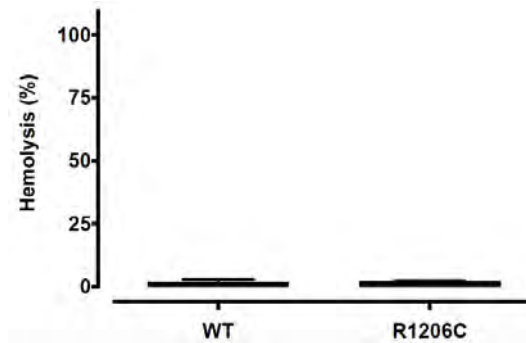

Cofactor activity

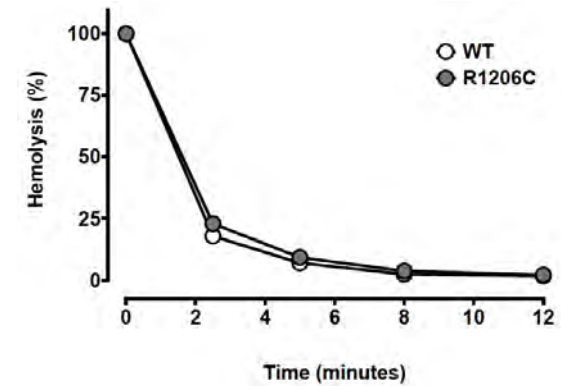

Decay-accelerating activity

# c.3628C>T (R1210C)

CADD: 2.95  
gnomAD:  $1 \times 10^{-4}$

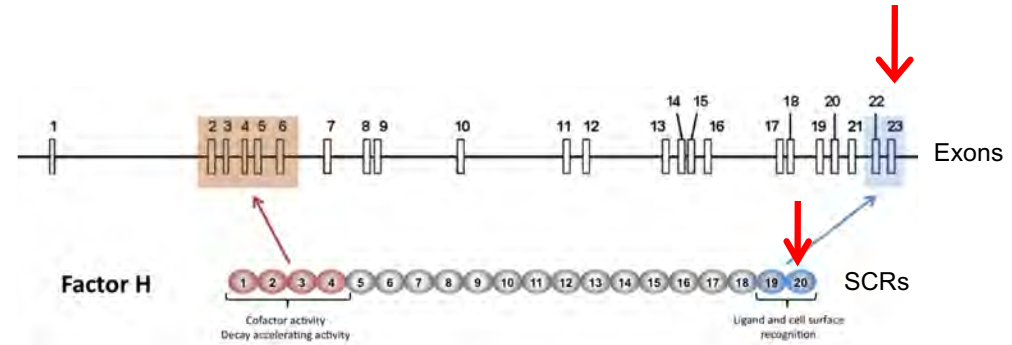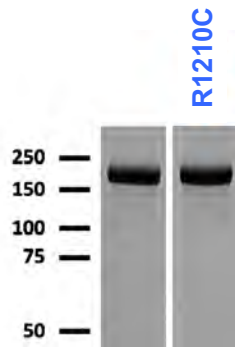

SDS-PAGE  
(Non-reduced)

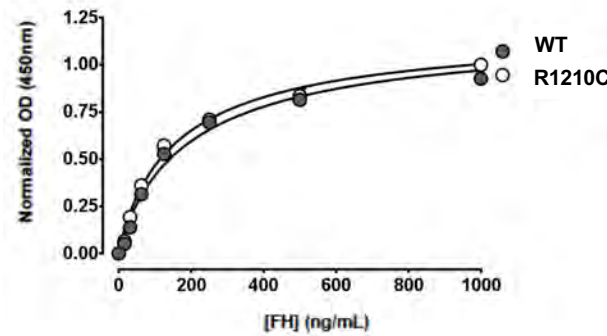

Binding to C3b

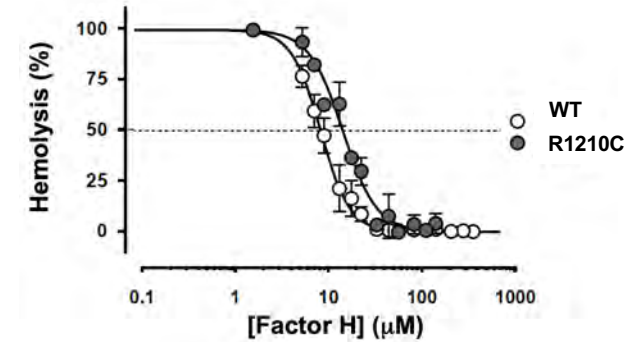

Hemolytic assay

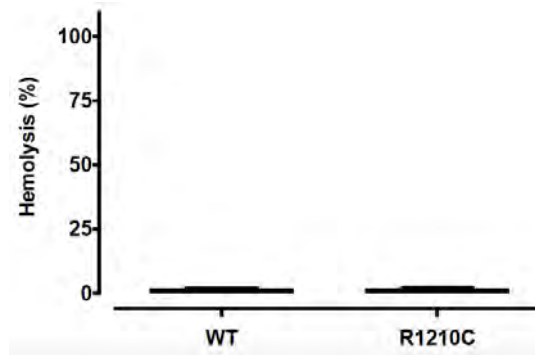

Cofactor activity

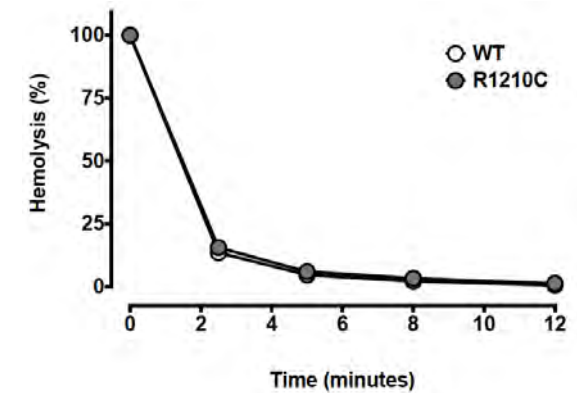

Decay-accelerating activity

**Conclusion: Impaired Function  
PATHOGENIC**

**Previous studies:** Pathogenic in Sánchez-Corral P, Pérez-Caballero D, Huarte O, et al. Structural and Functional Characterization of Factor H Mutations Associated with Atypical Hemolytic Uremic Syndrome. *The American Journal of Human Genetics*. 2002;71(6):1285-1295.

**Comments:**

The pathogenicity of this variant is a consequence of the novel cysteine residue organizing a covalent linkage with albumin. The FH-Alb dimers that this mutant forms in vivo are not present in the recombinant protein.



# c.3644G>A (R1215Q)

**CADD: 15.74**  
**gnomAD: Not present**

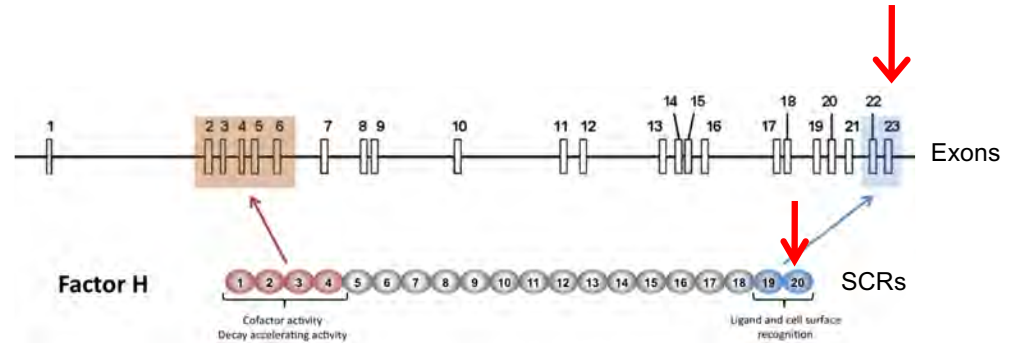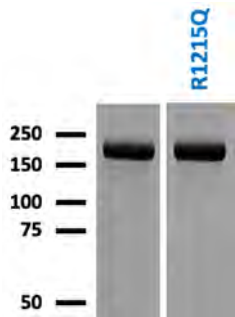

**SDS-PAGE**  
(Non-reduced)

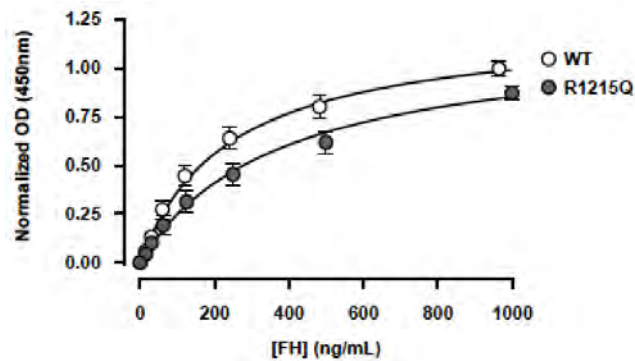

**Binding to C3b**

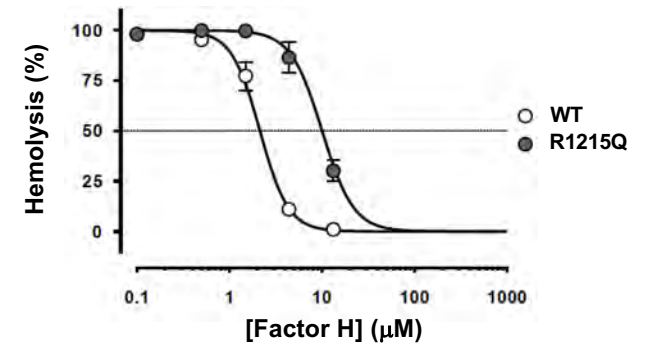

**Hemolytic assay**

**Conclusion: Impaired Function**  
**PATHOGENIC**

**Previous studies:** Pathogenic in Lehtinen MJ, Rops AL, Iseman DE, van der Vlag J, Jokiranta TS. Mutations of factor H impair regulation of surface-bound C3b by three mechanisms in atypical hemolytic uremic syndrome. *J Biol Chem.* 2009;284(23):15650-15658.

Comments:

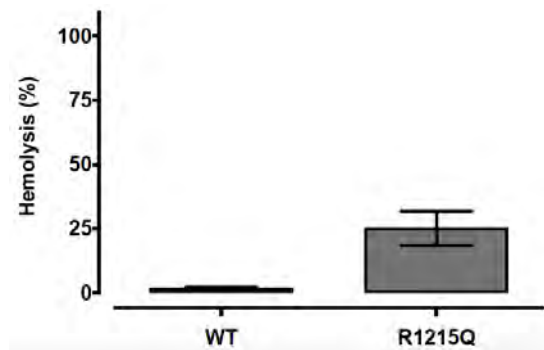

**Cofactor activity**

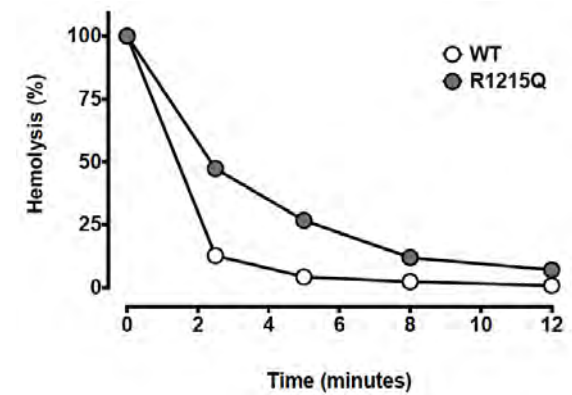

**Decay-accelerating activity**
